# Supplementary material for: Comparative Tandem Mass Tag-Based Quantitative Proteomic Analysis of Tachaea chinensis Isopod During Parasitism
Source: Front Cell Infect Microbiol. 2019 Oct 11;9:350. doi: 10.3389/fcimb.2019.00350 (PMC6798089; doi:10.3389/fcimb.2019.00350)
Supplement: Table S1 — Lists of proteins indented from Tachaea chinensis. [file Table_1.XLSX]

## Sheet: Table S1
Table S1 Lists of proteins indenfited from Tachaea chinensis
	Description	Coverage	Peptides	PSMs	Unique Peptides	Protein Groups	AAs	MW [kDa]	calc. pI	Abundances (Scaled): F1: 126, A1	Abundances (Scaled): F1: 127, A2	Abundances (Scaled): F1: 128, A3	Abundances (Scaled): F1: 129, B1	Abundances (Scaled): F1: 130, B2	Abundances (Scaled): F1: 131, B3	Average A	Average B	FC A/B	P value
1371969814	calcium-transporting ATPase sarcoplasmic/endoplasmic reticulum type-like [Hirondellea gigas]	13.8861	13	36	2	1	1001	109.5	5.52	1.185	0.984	1.106	0.867	0.948	0.911	1.09167	0.908667	1.20139	0.0438632
1562023247	Histone H4 [Armadillidium vulgare]	16.8224	2	2	1	1	107	12.4	9.5	1.087	1.143	1.045	0.895	0.948	0.881	1.09167	0.908	1.20228	0.00628086
1371956987	peroxiredoxin, partial [Hirondellea gigas]	9.64912	1	1	1	1	114	12.4	5.48	1.14	1.021	1.116	0.987	0.876	0.859	1.09233	0.907333	1.20389	0.0268488
1067084430	PREDICTED: NADH dehydrogenase [ubiquinone] flavoprotein 1, mitochondrial-like [Hyalella azteca]	8.54701	3	3	3	1	468	50.9	8.21	1.117	1.105	1.056	0.854	0.973	0.895	1.09267	0.907333	1.20426	0.00942645
1067103684	PREDICTED: malate dehydrogenase, mitochondrial-like [Hyalella azteca]	2.63158	1	1	1	1	342	35.5	8.57	1.117	1.075	1.09	0.864	0.863	0.992	1.094	0.906333	1.20706	0.0135714
1562028019	M-phase inducer phosphatase [Armadillidium vulgare]	1.57895	1	1	1	1	380	44	9.25	1.079	1.064	1.139	0.861	0.928	0.93	1.094	0.906333	1.20706	0.00433501
1561970922	Laminin subunit alpha [Armadillidium vulgare]	2.1645	1	2	1	1	462	51.7	6.33	1.084	1.022	1.198	0.862	0.963	0.871	1.10133	0.898667	1.22552	0.0290306
1067097810	PREDICTED: L-2-hydroxyglutarate dehydrogenase, mitochondrial-like [Hyalella azteca]	2.72727	1	2	1	1	440	48.7	8.41	1.087	1.096	1.123	0.947	0.896	0.851	1.102	0.898	1.22717	0.00237269
1371970385	40S ribosomal protein S5 [Hirondellea gigas]	4.18605	1	1	1	1	215	23.9	9.89	1.135	1.073	1.11	0.801	0.951	0.93	1.106	0.894	1.23714	0.0134738
1067075940	PREDICTED: 40S ribosomal protein S14 [Hyalella azteca]	8.60927	1	2	1	1	151	16.3	10.11	1.089	1.147	1.086	0.963	0.788	0.927	1.10733	0.892667	1.24048	0.0195911
1562030194	Histone H1.0-A [Armadillidium vulgare]	7.92079	2	3	2	1	202	22.3	11.28	1.17	1.053	1.106	0.877	0.894	0.899	1.10967	0.89	1.24682	0.00311105
1562011558	Sodium/calcium exchanger 3 [Armadillidium vulgare]	1.2069	1	1	1	1	580	65	4.78	1.151	1.046	1.145	0.835	0.902	0.921	1.114	0.886	1.25734	0.0060208
1371968809	histidine ammonia-lyase-like [Hirondellea gigas]	1.43062	1	1	1	1	699	75.8	6.74	1.187	0.989	1.177	0.875	0.923	0.849	1.11767	0.882333	1.26672	0.0257367
1562033211	hypothetical protein Avbf_05421, partial [Armadillidium vulgare]	4.80349	1	1	1	1	229	25.9	9.32	1.193	1.026	1.138	0.866	0.923	0.854	1.119	0.881	1.27015	0.0112933
1371969232	four and a half LIM domains protein 2-like [Hirondellea gigas]	5.04425	5	12	2	1	1130	127	8.56	1.062	1.226	1.072	0.919	0.861	0.859	1.12	0.879667	1.27321	0.0132045
1547583175	Na+/K+-ATPase, partial [Porcellionides cilicius]	29.703	5	9	1	1	202	22.4	6.77	1.16	1.007	1.197	0.933	0.849	0.855	1.12133	0.879	1.27569	0.0194675
1562029774	40S ribosomal protein S11 [Armadillidium vulgare]	3.57143	1	1	1	1	196	22.9	10.68	1.176	1.008	1.187	0.781	0.883	0.966	1.12367	0.876667	1.28175	0.0350958
1246309936	sodium potassium ATPase alpha subunit, partial [Ligia dentipes]	25.9912	5	9	1	1	227	25.2	5.39	1.195	1.044	1.133	0.908	0.927	0.794	1.124	0.876333	1.28262	0.0148269
1371970304	alpha actin-like protein, partial [Hirondellea gigas]	34.7826	7	46	1	1	253	28.3	5.07	1.127	1.074	1.177	0.904	0.851	0.867	1.126	0.874	1.28833	0.0016957
1371970028	phosphate carrier protein, mitochondrial-like [Hirondellea gigas]	5.38244	2	3	1	1	353	38.5	9.07	1.089	1.116	1.173	0.971	0.847	0.804	1.126	0.874	1.28833	0.0107236
1562018147	Dynein light chain 1, cytoplasmic [Armadillidium vulgare]	29	2	3	2	1	100	11.5	7.8	1.21	1.049	1.133	0.831	0.91	0.868	1.13067	0.869667	1.30011	0.00728429
1561977122	40S ribosomal protein S16 [Armadillidium vulgare]	17.2414	2	2	1	1	116	13.3	9.39	1.22	1.017	1.163	0.805	0.905	0.891	1.13333	0.867	1.30719	0.0173423
1562019919	Dystonin [Armadillidium vulgare]	3.5533	1	1	1	1	394	44.7	5.3	1.119	1.168	1.12	0.813	0.929	0.851	1.13567	0.864333	1.31392	0.00199058
1562025521	Death-associated protein 1 [Armadillidium vulgare]	7.40741	1	1	1	1	108	12.2	9.57	1.218	1.048	1.141	0.893	0.906	0.794	1.13567	0.864333	1.31392	0.0109798
1561997290	Phosrestin-1 [Armadillidium vulgare]	2.09974	1	1	1	1	381	41.9	8.84	1.152	1.078	1.178	0.885	0.877	0.83	1.136	0.864	1.31481	0.00140259
26324131	smooth endoplasmic reticulum calcium ATPase [Porcellio scaber]	18.9621	17	46	6	1	1002	109.7	5.36	1.113	1.11	1.191	0.95	0.826	0.809	1.138	0.861667	1.3207	0.00592506
1067074389	PREDICTED: uncharacterized abhydrolase domain-containing protein DDB_G0269086-like [Hyalella azteca]	6.69456	1	2	1	1	239	25.4	4.98	1.149	1.1	1.173	0.806	0.886	0.886	1.14067	0.859333	1.32739	0.00119623
1371963965	chitinase 3, partial [Hirondellea gigas]	2.04918	1	2	1	1	732	82.5	7.87	1.208	1.121	1.143	0.794	0.864	0.869	1.15733	0.842333	1.37396	0.000901927
1220106012	NADH dehydrogenase subunit 1 (mitochondrion) [Armadillidium vulgare]	3.55987	1	1	1	1	309	34.7	8.88	1.161	1.183	1.169	0.883	0.805	0.8	1.171	0.829333	1.41198	0.000245807
1561990362	Four and a half LIM domains protein 2 [Armadillidium vulgare]	27.6923	5	13	2	1	195	22.1	8.38	1.128	1.124	1.287	1.029	0.77	0.663	1.17967	0.820667	1.43745	0.0414568
1561970059	Cyclic AMP-responsive element-binding protein 1 [Armadillidium vulgare]	1.983	1	1	1	1	353	37.5	7.56	1.203	1.076	1.26	0.796	0.792	0.873	1.17967	0.820333	1.43803	0.00401345
1371964021	titin-like, partial [Hirondellea gigas]	1.44388	3	4	1	1	2147	243.5	5.91	1.226	1.078	1.236	0.862	0.841	0.758	1.18	0.820333	1.43844	0.00393039
1561979674	60S ribosomal protein L21 [Armadillidium vulgare]	5.44218	1	1	1	1	147	17.1	10.8	1.103	1.154	1.293	0.964	0.793	0.693	1.18333	0.816667	1.44898	0.0196864
1562033203	Bifunctional purine biosynthesis protein PURH [Armadillidium vulgare]	2.48307	1	1	1	1	443	49.1	7.33	1.225	1.032	1.309	0.843	0.854	0.737	1.18867	0.811333	1.46508	0.0138224
195979061	myosin heavy chain, partial [Gammarus duebeni]	5.47368	3	11	2	1	475	53.3	6.24	1.191	1.15	1.251	0.846	0.798	0.764	1.19733	0.802667	1.49169	0.000473533
1371959777	galactose ABC transporter substrate-binding protein [Hirondellea gigas]	3.26409	1	1	1	1	337	37.1	5.03	1.18	1.175	1.249	0.81	0.742	0.844	1.20133	0.798667	1.50417	0.000464251
1067062399	PREDICTED: uncharacterized protein LOC108671976 [Hyalella azteca]	1.11732	1	1	1	1	895	103.6	6.51	1.349	1.218	1.374	0.635	0.73	0.694	1.31367	0.686333	1.91404	0.000355051
1371963343	hemocyanin, partial [Hirondellea gigas]	24.1758	2	3	1	1	91	10.5	6.79	0.093	0.092	0.098	3.127	1.464	1.127	0.0943333	1.906	0.0494928	0.0427914
1371963472	hemocyanin, partial [Hirondellea gigas]	33.0097	3	6	2	1	103	12.5	6.19	0.216	0.253	0.233	2.269	1.665	1.365	0.234	1.76633	0.132478	0.00450808
427782987	Putative salivary alkaline phosphatase [Rhipicephalus pulchellus]	1.68224	1	1	1	1	535	58.2	6.6	0.599	0.581	0.61	1.334	1.389	1.486	0.596667	1.403	0.425279	5.81774e-05
1562034533	Troponin C, isoform 2 [Armadillidium vulgare]	12.6582	2	6	2	1	158	18.3	4.7	0.681	0.587	0.628	1.318	1.356	1.431	0.632	1.36833	0.461876	6.77434e-05
1371970188	hemocyanin, partial [Hirondellea gigas]	4.40771	1	11	1	1	363	41.4	5.44	0.7	0.608	0.671	1.4	1.304	1.316	0.659667	1.34	0.492289	7.44203e-05
1562028599	6-phosphofructo-2-kinase/fructose-2,6-bisphosphatase [Armadillidium vulgare]	2.40385	1	1	1	1	416	48.4	7.02	0.782	0.658	0.55	0.959	1.437	1.614	0.663333	1.33667	0.496259	0.0311938
1371958939	calmodulin 1, partial [Hirondellea gigas]	24.2718	3	7	1	1	103	11.6	4.16	0.836	0.671	0.741	1.083	1.246	1.423	0.749333	1.25067	0.599147	0.0100998
1067100877	PREDICTED: RNA-binding protein cabeza-like, partial [Hyalella azteca]	3.4188	1	1	1	1	234	22.2	8.46	0.803	0.655	0.801	1.259	1.233	1.25	0.753	1.24733	0.603688	0.000569054
1067064770	PREDICTED: aminopeptidase N-like [Hyalella azteca]	0.594273	1	2	1	1	1851	208.5	4.91	0.8	0.786	0.727	1.154	1.236	1.296	0.771	1.22867	0.627509	0.000614802
1561997562	MICOS complex subunit Mic60 [Armadillidium vulgare]	3.26296	2	5	2	1	521	58.5	8.88	0.851	0.684	0.78	1.068	1.355	1.261	0.771667	1.228	0.628393	0.00939611
1067094619	PREDICTED: troponin C-like isoform X1 [Hyalella azteca]	7.33333	1	4	1	1	150	16.9	4.08	0.682	1.038	0.612	1.16	1.171	1.337	0.777333	1.22267	0.635769	0.0363166
1371969475	26S protease regulatory subunit 6B [Hirondellea gigas]	5.55556	3	3	1	1	414	46.7	5.58	0.757	0.816	0.787	1.305	1.197	1.138	0.786667	1.21333	0.648352	0.0011827
1561973869	Barrier-to-autointegration factor [Armadillidium vulgare]	11.1111	1	1	1	1	90	10.1	5.9	0.849	0.751	0.803	1.018	1.247	1.333	0.801	1.19933	0.667871	0.0153813
1067068263	PREDICTED: tropomyosin isoform X2 [Hyalella azteca]	22.1374	12	56	0	1	393	44.2	4.7	0.847	0.744	0.832	1.109	1.279	1.19	0.807667	1.19267	0.677194	0.00278979
1371969117	phosphoglucomutase [Hirondellea gigas]	3.01954	1	1	1	1	563	61.4	5.26	0.806	0.826	0.795	1.118	1.221	1.234	0.809	1.191	0.679261	0.000539426
1562025605	Protein disulfide-isomerase A6 [Armadillidium vulgare]	2.26757	1	1	1	1	441	48.3	5.57	0.849	0.866	0.714	1.093	1.222	1.255	0.809667	1.19	0.680392	0.00527431
1371968916	dystonin-like, partial [Hirondellea gigas]	0.397727	2	3	1	1	3520	403.7	5.35	0.861	0.735	0.844	1.149	1.226	1.185	0.813333	1.18667	0.685393	0.00118307
1562031674	Troponin T [Armadillidium vulgare]	5.83658	2	3	1	1	257	30.2	9.01	0.906	0.727	0.858	1.136	1.213	1.161	0.830333	1.17	0.709687	0.00426961
1562022706	14-3-3 protein zeta [Armadillidium vulgare]	32.4723	7	20	1	1	271	30.7	5.06	0.791	0.775	0.933	1.201	1.11	1.191	0.833	1.16733	0.713592	0.00446392
1562006601	Prefoldin subunit 6 [Armadillidium vulgare]	14.8438	2	3	2	1	128	14.7	6.21	0.946	0.787	0.766	0.973	1.268	1.26	0.833	1.167	0.713796	0.0411278
1561988379	Myosin-2 essential light chain [Armadillidium vulgare]	14.966	2	3	2	1	147	16.6	4.73	0.944	0.722	0.834	1.166	1.151	1.181	0.833333	1.166	0.714694	0.00677192
190014500	70kDa heat shock protein [Gammarus locusta]	7.64431	4	10	1	1	641	70.1	5.53	0.828	0.875	0.802	1.059	1.201	1.235	0.835	1.165	0.716738	0.0047068
1562024141	Coiled-coil domain-containing protein 6, partial [Armadillidium vulgare]	7.41627	2	2	2	1	418	47.6	6.58	0.988	0.709	0.81	1.113	1.164	1.214	0.835667	1.16367	0.718132	0.0193184
1067116995	PREDICTED: inorganic pyrophosphatase-like isoform X1 [Hyalella azteca]	3.41463	1	1	1	1	410	46.2	5.08	0.834	0.795	0.887	1.214	1.161	1.109	0.838667	1.16133	0.722158	0.0013282
1067117088	PREDICTED: troponin C-like [Hyalella azteca]	5.44218	1	1	1	1	147	16.7	4.17	0.976	0.727	0.831	1.174	1.213	1.08	0.844667	1.15567	0.730891	0.0194469
1371968465	GTP cyclohydrolase 1-like [Hirondellea gigas]	2.30769	1	1	1	1	390	42.5	7.01	0.844	0.87	0.821	1.07	1.194	1.201	0.845	1.155	0.731602	0.00229674
1562029141	Protein CutA-like protein [Armadillidium vulgare]	14.2857	1	1	1	1	84	9.8	5.21	0.874	0.789	0.873	1.155	1.114	1.196	0.845333	1.155	0.73189	0.00109109
1562001515	Trehalase [Armadillidium vulgare]	1.45985	1	1	1	1	548	62.8	5.26	0.897	0.768	0.876	0.997	1.195	1.268	0.847	1.15333	0.734393	0.0274535
1562021577	Ribose-phosphate pyrophosphokinase 2 [Armadillidium vulgare]	7.29167	1	2	1	1	192	21.1	6.1	0.907	0.829	0.806	1.119	1.147	1.192	0.847333	1.15267	0.735107	0.00120462
1562028429	hypothetical protein Avbf_05797 [Armadillidium vulgare]	4.14313	2	3	2	1	531	59.7	6.07	0.869	0.783	0.893	1.031	1.186	1.238	0.848333	1.15167	0.736614	0.0126642
1371970147	nucleoside diphosphate kinase [Hirondellea gigas]	7.73481	1	2	1	1	181	20.2	8.4	0.886	0.775	0.885	1.074	1.107	1.274	0.848667	1.15167	0.736903	0.0136261
1067070998	PREDICTED: neurocalcin homolog isoform X3 [Hyalella azteca]	10.5263	2	2	2	1	190	21.9	5.25	0.918	0.746	0.891	1.153	1.136	1.156	0.851667	1.14833	0.741655	0.00526691
164632859	alpha-2-macroglobulin, partial [Armadillidium vulgare]	3.85289	2	3	1	1	571	61.7	4.94	0.878	0.858	0.838	1.114	1.115	1.197	0.858	1.142	0.751313	0.000679286
1561998636	hypothetical protein Avbf_15080 [Armadillidium vulgare]	4.0201	1	2	1	1	199	22.8	6.54	0.817	0.904	0.854	1.042	1.19	1.193	0.858333	1.14167	0.751825	0.00711626
1562030658	Protein disulfide-isomerase [Armadillidium vulgare]	5.17241	3	4	2	1	522	58.7	4.77	0.907	0.791	0.881	1.128	1.147	1.146	0.859667	1.14033	0.753873	0.00141186
1067085871	PREDICTED: calcineurin subunit B type 2 isoform X1 [Hyalella azteca]	4.69484	1	1	1	1	213	23.5	4.97	0.877	0.785	0.919	1.021	1.257	1.141	0.860333	1.13967	0.754899	0.0238976
1562022618	Protein disulfide-isomerase [Armadillidium vulgare]	9.83607	1	2	1	1	122	14.7	9.07	0.871	0.843	0.874	1.213	1.171	1.028	0.862667	1.13733	0.758499	0.00845694
1371970321	myosin light chain [Hirondellea gigas]	8.44156	1	4	1	1	154	17.6	4.77	0.874	0.809	0.912	1.102	1.11	1.194	0.865	1.13533	0.761891	0.0030164
1067085998	PREDICTED: UDP-glucuronosyltransferase 2B14-like [Hyalella azteca]	3.84615	1	5	1	1	156	17.8	9.57	0.85	0.918	0.828	1.125	1.171	1.108	0.865333	1.13467	0.762632	0.00122445
1561987640	Endoplasmin [Armadillidium vulgare]	3.98506	3	5	2	1	803	92.1	5.02	0.904	0.82	0.878	1.058	1.158	1.181	0.867333	1.13233	0.76597	0.00422095
1067062104	PREDICTED: uncharacterized protein LOC108677944 [Hyalella azteca]	2.90237	1	1	1	1	379	42.2	5.96	0.855	0.862	0.887	1.164	1.148	1.084	0.868	1.132	0.766784	0.000553769
1067061287	PREDICTED: glutathione peroxidase-like [Hyalella azteca]	4.21941	1	1	1	1	237	26.4	4.92	0.879	0.787	0.942	1.207	1.105	1.081	0.869333	1.131	0.768641	0.0115827
1067098190	PREDICTED: troponin I-like isoform X1 [Hyalella azteca]	11.5727	5	9	5	1	337	36.9	5.03	0.87	0.895	0.846	1.13	1.07	1.19	0.870333	1.13	0.770206	0.00226444
1067084661	PREDICTED: alpha-2-macroglobulin-like isoform X1 [Hyalella azteca]	1.22324	2	2	1	1	1635	179	4.88	0.912	0.845	0.859	1.105	1.123	1.156	0.872	1.128	0.77305	0.000535693
1371969013	dolichyl-diphosphooligosaccharide--protein glycosyltransferase subunit STT3A-like [Hirondellea gigas]	1.66205	1	1	1	1	722	82.1	7.87	0.87	0.888	0.862	1.085	1.061	1.234	0.873333	1.12667	0.775148	0.00976984
1067071408	PREDICTED: 14-3-3 protein zeta isoform X2 [Hyalella azteca]	32.1138	7	19	0	1	246	28.1	4.89	0.886	0.814	0.923	1.085	1.147	1.145	0.874333	1.12567	0.776725	0.00268789
1371968441	AFG3-like protein 2, partial [Hirondellea gigas]	3.04709	2	2	2	1	722	79.7	7.75	0.895	0.81	0.921	1.123	1.147	1.106	0.875333	1.12533	0.777844	0.00215804
1371961187	protein unc-79 homolog, partial [Hirondellea gigas]	2.15232	1	1	1	1	604	64.7	7.37	0.899	0.815	0.917	1.004	1.221	1.144	0.877	1.123	0.780944	0.0255552
1371968467	fructose 1,6-bisphosphatase [Hirondellea gigas]	8.33333	2	3	1	1	276	30	5.35	0.928	0.774	0.936	1.12	1.099	1.143	0.879333	1.12067	0.784652	0.0112429
1562029772	Ubiquitin-protein ligase E3C [Armadillidium vulgare]	0.872093	1	2	1	1	1032	117.5	6.76	0.876	0.829	0.933	1.177	1.154	1.03	0.879333	1.12033	0.784885	0.0116123
1562033237	Protein CREG1 [Armadillidium vulgare]	3.57143	1	2	1	1	224	25.5	5.26	0.886	0.883	0.875	1.041	1.121	1.194	0.881333	1.11867	0.787843	0.0058586
1562036843	hypothetical protein Avbf_00409 [Armadillidium vulgare]	4.96689	3	5	3	1	604	68.4	5.03	0.934	0.875	0.837	1.128	1.127	1.098	0.882	1.11767	0.789144	0.00139826
1067091261	PREDICTED: calmodulin-like [Hyalella azteca]	18.1818	3	6	1	1	132	14.8	4.41	0.895	0.906	0.848	1.104	1.083	1.164	0.883	1.117	0.79051	0.00147397
1561984326	Myosin light chain alkali [Armadillidium vulgare]	9.44882	1	2	1	1	127	14.6	4.86	0.938	0.864	0.85	1.184	1.056	1.108	0.884	1.116	0.792115	0.00732929
1371965865	serine/threonine-protein phosphatase 4 regulatory subunit 1-like [Hirondellea gigas]	0.522388	1	1	1	1	1340	149.3	4.65	0.904	0.86	0.899	1.129	1.094	1.114	0.887667	1.11233	0.798022	0.000198806
1067085019	PREDICTED: isocitrate dehydrogenase [NADP], mitochondrial-like, partial [Hyalella azteca]	16.4103	3	4	2	1	195	21.7	6.79	0.867	0.854	0.943	1.034	1.089	1.213	0.888	1.112	0.798561	0.0199889
1561980667	hypothetical protein Avbf_16881 [Armadillidium vulgare]	4.12758	2	2	2	1	533	60.8	4.87	0.876	0.893	0.901	1.015	1.137	1.178	0.89	1.11	0.801802	0.0112984
1562011562	Peptidyl-prolyl cis-trans isomerase FKBP7 [Armadillidium vulgare]	13.8095	4	7	4	1	210	23.5	4.79	0.929	0.856	0.886	1.123	1.133	1.073	0.890333	1.10967	0.802343	0.00146632
1562026595	Calreticulin, partial [Armadillidium vulgare]	13.0303	3	5	3	1	330	38.4	4.93	0.877	0.907	0.892	1.079	1.129	1.115	0.892	1.10767	0.805296	0.000234223
1562031457	Transcription elongation factor SPT6 [Armadillidium vulgare]	0.693374	1	1	1	1	1298	149.3	5.64	0.957	0.812	0.908	1.012	1.207	1.104	0.892333	1.10767	0.805597	0.0380401
1561990168	60 kDa heat shock protein, mitochondrial [Armadillidium vulgare]	14.1856	8	13	8	1	571	60.5	5.41	0.965	0.829	0.884	1.061	1.118	1.144	0.892667	1.10767	0.805898	0.00984324
1371969955	tubulin alpha-3 chain-like, partial [Hirondellea gigas]	34.3182	10	24	1	1	440	48.8	5.05	0.941	0.827	0.917	1.043	1.143	1.129	0.895	1.105	0.809955	0.010853
1562026096	Vacuolar protein sorting-associated protein 28-like protein [Armadillidium vulgare]	5.18868	1	1	1	1	212	24.7	5.11	0.86	0.908	0.919	1.042	1.037	1.235	0.895667	1.10467	0.810803	0.0365989
1562030180	Fatty acid synthase [Armadillidium vulgare]	0.574459	1	2	1	1	2263	248.7	5.49	0.9	0.852	0.939	1.03	1.201	1.077	0.897	1.10267	0.813482	0.0224308
1067101392	PREDICTED: mitogen-activated protein kinase 14B-like [Hyalella azteca]	4.08163	1	1	1	1	392	44	7.3	0.926	0.949	0.82	1.19	1.079	1.036	0.898333	1.10167	0.815431	0.0285546
1202288454	Insulin receptor substrate 2-B, partial [Ornithodoros moubata]	2.34742	1	1	1	1	426	46.2	6.38	0.941	0.83	0.924	1.068	1.135	1.101	0.898333	1.10133	0.815678	0.00683602
1562032308	Charged multivesicular body protein 5 [Armadillidium vulgare]	3.22581	1	1	1	1	217	24.6	4.78	0.898	0.912	0.893	1.027	1.087	1.184	0.901	1.09933	0.819588	0.0126155
1067089815	PREDICTED: isocitrate dehydrogenase [NADP] cytoplasmic-like [Hyalella azteca]	5.63725	2	2	1	1	408	45.7	6.74	0.901	0.878	0.925	1.187	1.041	1.068	0.901333	1.09867	0.820388	0.0135707
1562023122	Clathrin light chain [Armadillidium vulgare]	3.28638	1	1	1	1	213	24.4	5.07	0.954	0.824	0.934	1.086	1.111	1.09	0.904	1.09567	0.825068	0.00960684
1562030151	hypothetical protein Avbf_03632 [Armadillidium vulgare]	4.61095	1	1	1	1	347	40.9	7.01	0.923	0.854	0.938	1.073	1.104	1.108	0.905	1.095	0.826484	0.0025056
1371966397	kynurenine--oxoglutarate transaminase 3-like, partial [Hirondellea gigas]	2.68595	1	2	1	1	484	53.9	7.71	0.893	0.899	0.923	1.054	1.153	1.078	0.905	1.095	0.826484	0.00367362
1371970216	heat shock protein HSP 90-alpha-like [Hirondellea gigas]	7.48588	5	7	0	1	708	82	5.05	0.951	0.883	0.89	1.099	1.067	1.11	0.908	1.092	0.831502	0.00185769
1562032021	Ubiquitin carboxyl-terminal hydrolase 7 [Armadillidium vulgare]	1.1839	1	1	1	1	1267	145.5	5.77	0.979	0.835	0.912	1.005	1.143	1.125	0.908667	1.091	0.832875	0.0385518
1562031882	PI-actitoxin-Aeq3a [Armadillidium vulgare]	6.50888	1	1	1	1	169	19.5	4.81	0.923	0.916	0.889	1.183	1.068	1.022	0.909333	1.091	0.833486	0.0206824
1561978497	Isocitrate dehydrogenase [NADP] cytoplasmic [Armadillidium vulgare]	4.65116	1	2	1	1	215	24.2	7.39	0.934	0.874	0.92	1.087	1.142	1.043	0.909333	1.09067	0.833741	0.00588331
1562029713	putative heat shock protein HSP 90-alpha A4 [Armadillidium vulgare]	10.8607	5	8	2	1	488	55.7	5.08	0.941	0.867	0.92	1.063	1.114	1.094	0.909333	1.09033	0.833996	0.00242
1562031639	Delta-1-pyrroline-5-carboxylate dehydrogenase, mitochondrial [Armadillidium vulgare]	6.639	3	8	1	1	482	53.3	8.03	0.954	0.869	0.906	1.07	1.135	1.067	0.909667	1.09067	0.834046	0.00545788
1371965305	stress-activated protein kinase JNK-like [Hirondellea gigas]	3.14342	1	1	1	1	509	57.2	7.4	0.961	0.923	0.845	1.154	0.988	1.129	0.909667	1.09033	0.834301	0.0433708
1562036602	Eukaryotic translation initiation factor 1A, Y-chromosomal [Armadillidium vulgare]	7.43243	1	1	1	1	148	16.9	5.36	0.953	0.832	0.946	1.016	1.116	1.136	0.910333	1.08933	0.835679	0.0295195
1561972858	Prefoldin subunit 1 [Armadillidium vulgare]	14.0496	2	2	2	1	121	14.1	9.63	0.945	0.872	0.917	1.125	1.107	1.035	0.911333	1.089	0.836853	0.0069267
1371967416	E3 ubiquitin-protein ligase UBR4-like, partial [Hirondellea gigas]	0.19674	1	1	1	1	3558	382.5	5.92	0.978	0.81	0.949	1.085	1.131	1.047	0.912333	1.08767	0.838799	0.037569
1561983952	hypothetical protein Avbf_13599, partial [Armadillidium vulgare]	4.74684	2	3	2	1	316	36.1	8.07	0.976	0.825	0.937	1.075	1.113	1.073	0.912667	1.087	0.83962	0.0207963
1067083067	PREDICTED: S-phase kinase-associated protein 1 [Hyalella azteca]	12.3457	2	2	2	1	162	18.4	4.53	0.908	0.897	0.934	1.127	1.087	1.047	0.913	1.087	0.839926	0.0024356
1561968011	hypothetical protein Avbf_16757, partial [Armadillidium vulgare]	9.57447	2	7	2	1	188	20.7	7.06	0.94	0.873	0.933	1.082	1.088	1.084	0.915333	1.08467	0.843884	0.0013646
1067108698	PREDICTED: LOW QUALITY PROTEIN: mediator of RNA polymerase II transcription subunit 11-like [Hyalella azteca]	8.18182	1	1	1	1	110	12.6	8.19	0.964	0.899	0.885	1.013	1.166	1.074	0.916	1.08433	0.844759	0.0293609
1562036618	Bleomycin hydrolase [Armadillidium vulgare]	4.7619	1	1	1	1	252	29	6.64	0.971	0.915	0.864	0.989	1.129	1.131	0.916667	1.083	0.846414	0.0416778
262305275	glycogen synthase, partial [Armadillidium vulgare]	6.30915	2	3	2	1	317	36.2	7.64	0.928	0.876	0.947	1.058	1.137	1.053	0.917	1.08267	0.846983	0.00863844
1562027280	Proteasome subunit beta type-5 [Armadillidium vulgare]	4.60993	1	2	1	1	282	31.5	6.65	0.912	0.892	0.948	1.14	1.099	1.009	0.917333	1.08267	0.847291	0.0170291
1561992339	putative serine/threonine-protein phosphatase PP2A regulatory subunit [Armadillidium vulgare]	10.4384	4	5	4	1	479	53	5.21	0.89	0.936	0.926	1.167	1.035	1.046	0.917333	1.08267	0.847291	0.0206077
1067092188	PREDICTED: ras-related protein Rab-11A-like [Hyalella azteca]	28.1106	6	12	6	1	217	24.1	5.49	0.955	0.855	0.942	1.054	1.085	1.109	0.917333	1.08267	0.847291	0.00932737
1067069887	PREDICTED: small ubiquitin-related modifier-like [Hyalella azteca]	21.2766	2	2	2	1	94	10.7	5.1	0.964	0.872	0.919	1.056	1.144	1.044	0.918333	1.08133	0.84926	0.0167584
1562027677	Myosin heavy chain, non-muscle [Armadillidium vulgare]	5.68966	4	6	2	1	580	68.1	5.21	0.961	0.853	0.942	1.034	1.136	1.074	0.918667	1.08133	0.849568	0.021814
1067078073	PREDICTED: heat shock protein HSP 90-alpha-like [Hyalella azteca]	10.2351	7	10	1	1	723	83	5	0.942	0.888	0.932	0.989	1.117	1.132	0.920667	1.07933	0.852996	0.0303771
1562029240	cAMP-dependent protein kinase regulatory subunit [Armadillidium vulgare]	6.64452	2	3	1	1	301	33.7	4.91	0.941	0.862	0.96	1.04	1.045	1.152	0.921	1.079	0.853568	0.028773
1561973609	Laminin subunit gamma-1 [Armadillidium vulgare]	0.90009	1	1	1	1	1111	122.3	5.01	0.956	0.87	0.938	1.025	1.118	1.093	0.921333	1.07867	0.854141	0.0146055
1371964077	dystrophin, isoforms A/C/F/G/H-like, partial [Hirondellea gigas]	0.800641	1	1	1	1	1249	140.8	6.92	0.96	0.893	0.912	0.98	1.131	1.123	0.921667	1.078	0.854978	0.041868
1562003254	Cullin-associated NEDD8-dissociated protein 1 [Armadillidium vulgare]	3.31715	4	5	4	1	1236	138.5	6.99	0.96	0.837	0.969	1.055	1.131	1.048	0.922	1.078	0.855288	0.0359412
1067067475	PREDICTED: 26S protease regulatory subunit 7 [Hyalella azteca]	15.0115	6	10	1	1	433	48.3	5.77	0.942	0.879	0.945	1.023	1.058	1.152	0.922	1.07767	0.855552	0.0242661
1067080497	PREDICTED: longitudinals lacking protein-like [Hyalella azteca]	7.14286	1	2	1	1	126	14.5	6.52	0.919	0.918	0.93	1.066	1.048	1.118	0.922333	1.07733	0.856126	0.00190682
1561979364	Protein disulfide-isomerase A3 [Armadillidium vulgare]	3.45679	1	2	1	1	405	45.6	5.62	0.961	0.836	0.973	1.099	1.109	1.022	0.923333	1.07667	0.857585	0.0413451
1562026619	14-3-3 protein epsilon [Armadillidium vulgare]	28.6996	7	10	5	1	223	25	4.84	0.97	0.877	0.923	1.064	1.103	1.063	0.923333	1.07667	0.857585	0.00684992
1067067169	PREDICTED: proteasome subunit alpha type-3-like [Hyalella azteca]	7.48031	2	2	2	1	254	27.9	5.4	0.958	0.903	0.912	1.019	1.084	1.125	0.924333	1.076	0.859046	0.0126176
1371969659	pyruvate carboxylase, mitochondrial-like [Hirondellea gigas]	1.94585	2	3	2	1	1182	130.1	6.42	0.966	0.851	0.956	1.007	1.104	1.116	0.924333	1.07567	0.859312	0.0399167
1562028298	Prohibitin-2 [Armadillidium vulgare]	3.93013	1	1	1	1	229	25.5	9.69	0.908	0.911	0.954	1.092	1.106	1.029	0.924333	1.07567	0.859312	0.00564241
1241822721	mitochondrial glutamate dehydrogenase 1 [Eulimnogammarus verrucosus]	6.38686	3	7	1	1	548	60.4	7.27	0.929	0.937	0.911	1.047	1.056	1.119	0.925667	1.074	0.861887	0.00343866
1562033906	hypothetical protein Avbf_00417, partial [Armadillidium vulgare]	1.36286	2	2	1	1	1174	133	8.66	0.975	0.889	0.914	1.074	1.075	1.072	0.926	1.07367	0.862465	0.0044555
1562001699	Carnosine N-methyltransferase [Armadillidium vulgare]	1.63043	1	1	1	1	368	42.3	5.57	0.949	0.924	0.907	1.038	1.133	1.049	0.926667	1.07333	0.863354	0.0105884
1371957609	inositol monophosphatase family domain containing protein [Hirondellea gigas]	4.46429	2	2	2	1	336	35.5	7.01	1	0.91	0.875	1.035	1.071	1.109	0.928333	1.07167	0.866252	0.0288584
1562033622	Thymosin beta-4 [Armadillidium vulgare]	3.15315	1	2	1	1	222	24.7	5.72	0.988	0.879	0.92	1.027	1.084	1.101	0.929	1.07067	0.867684	0.0218805
1562035786	Heat shock 70 kDa protein cognate 5 [Armadillidium vulgare]	10.9827	6	9	6	1	692	75.4	6	0.953	0.879	0.957	1.027	1.123	1.061	0.929667	1.07033	0.868577	0.0205447
1067071597	PREDICTED: V-type proton ATPase subunit G-like [Hyalella azteca]	7.5	1	1	1	1	120	13.7	9.66	0.963	0.947	0.88	1.019	1.095	1.096	0.93	1.07	0.869159	0.0177223
1562012446	ATP synthase subunit beta, mitochondrial [Armadillidium vulgare]	19.2607	6	25	2	1	514	54.8	5.25	0.935	0.87	0.985	1.052	1.093	1.064	0.93	1.06967	0.86943	0.0169566
1562004595	Acyl-coenzyme A thioesterase 13 [Armadillidium vulgare]	6.25	1	1	1	1	144	15.3	9.33	0.896	0.974	0.924	1.051	1.051	1.104	0.931333	1.06867	0.871491	0.00890789
1371959847	venom dipeptidyl peptidase 4-like, partial [Hirondellea gigas]	3.50318	1	1	1	1	314	35.1	5.87	0.915	0.93	0.952	0.987	1.089	1.127	0.932333	1.06767	0.873244	0.0349886
1561981195	NADH dehydrogenase [ubiquinone] iron-sulfur protein 3, mitochondrial [Armadillidium vulgare]	4.19847	1	1	1	1	262	30.2	5.72	0.968	0.873	0.957	1.051	1.031	1.12	0.932667	1.06733	0.873829	0.0288699
1562013198	L-lactate dehydrogenase [Armadillidium vulgare]	7.43405	3	8	3	1	417	45.3	6.74	0.934	0.934	0.937	1.032	1.112	1.052	0.935	1.06533	0.87766	0.00562632
1562036473	COP9 signalosome complex subunit 4, partial [Armadillidium vulgare]	8.69565	3	3	3	1	391	45	6.3	1.003	0.87	0.932	1.05	1.077	1.068	0.935	1.065	0.877934	0.0295596
1067080307	PREDICTED: myosin heavy chain, non-muscle-like isoform X1 [Hyalella azteca]	6.85343	12	16	10	1	1999	230.4	5.57	0.944	0.91	0.953	1.133	1.052	1.008	0.935667	1.06433	0.879111	0.0296701
1561982068	ATP synthase subunit b, mitochondrial [Armadillidium vulgare]	6.03015	1	1	1	1	199	22.9	7.93	0.942	0.928	0.94	1.016	1.069	1.107	0.936667	1.064	0.880326	0.00890181
1562033018	Spectrin alpha chain [Armadillidium vulgare]	22.5989	39	63	16	1	1770	203.4	5.14	0.958	0.905	0.954	1.054	1.062	1.068	0.939	1.06133	0.884736	0.00221046
1371970126	spectrin alpha chain-like [Hirondellea gigas]	14.2268	33	50	5	1	2425	278.8	5.21	0.977	0.874	0.968	1.057	1.06	1.064	0.939667	1.06033	0.886199	0.0216422
1562029050	Microtubule-associated protein RP/EB family member 1 [Armadillidium vulgare]	10.4418	2	3	2	1	249	27.9	6.79	0.96	0.9	0.96	1.017	1.093	1.071	0.94	1.06033	0.886514	0.0162717
1562002620	V-type proton ATPase subunit E [Armadillidium vulgare]	3.9823	1	1	1	1	226	26.1	6.93	0.892	0.945	0.985	1.042	1.061	1.075	0.940667	1.05933	0.88798	0.0142383
1371969817	V-type proton ATPase subunit C-like [Hirondellea gigas]	2.06718	1	1	1	1	387	44.5	7.21	0.919	0.943	0.962	1.032	1.04	1.105	0.941333	1.059	0.888889	0.0109698
1561983039	ATPase family AAA domain-containing protein 3-B [Armadillidium vulgare]	2.69414	2	3	2	1	631	71.9	9.11	0.979	0.886	0.963	1.054	1.073	1.045	0.942667	1.05733	0.891551	0.0184778
1562025281	26S protease regulatory subunit 6B [Armadillidium vulgare]	10.3614	4	4	1	1	415	46.8	5.38	0.971	0.897	0.961	1.027	1.041	1.104	0.943	1.05733	0.891866	0.0260487
1562033119	Proteasome subunit beta type-3 [Armadillidium vulgare]	7.72727	2	3	2	1	220	24.8	6.99	0.972	0.869	0.994	1.068	1.056	1.041	0.945	1.055	0.895735	0.0489003
1067091865	PREDICTED: LOW QUALITY PROTEIN: propionyl-CoA carboxylase alpha chain, mitochondrial-like [Hyalella azteca]	0.966851	1	1	1	1	724	80.6	7.25	0.936	0.922	0.98	1.033	1.093	1.036	0.946	1.054	0.897533	0.0145832
1371967351	GRIP and coiled-coil domain-containing protein 2-like, partial [Hirondellea gigas]	0.842105	1	1	1	1	950	107.1	4.61	0.959	0.918	0.974	1.029	1.077	1.042	0.950333	1.04933	0.905654	0.0108825
1067067173	PREDICTED: heat shock protein 75 kDa, mitochondrial-like [Hyalella azteca]	1.67832	1	1	1	1	715	80.3	7.55	0.975	0.92	0.957	1.028	1.099	1.022	0.950667	1.04967	0.905684	0.0285801
1562026424	Coatomer subunit zeta-1 [Armadillidium vulgare]	6.21469	1	1	1	1	177	20.3	5.41	0.914	0.957	0.991	1.033	1.012	1.093	0.954	1.046	0.912046	0.0491821
1562035085	78 kDa glucose-regulated protein [Armadillidium vulgare]	12.5737	7	13	4	1	509	56.4	5.02	0.993	0.915	0.955	1.046	1.055	1.035	0.954333	1.04533	0.912946	0.0173351
1562029184	Spectrin beta chain [Armadillidium vulgare]	12.0829	29	39	16	1	2847	328.2	5.5	0.971	0.91	0.983	1.031	1.055	1.051	0.954667	1.04567	0.912974	0.0186917
1067087551	PREDICTED: prostaglandin reductase 1-like [Hyalella azteca]	2.18069	1	1	1	1	321	35.6	6.98	0.972	0.979	0.94	1.019	1.021	1.07	0.963667	1.03667	0.929582	0.0237421
372001231	heat shock protein 70 [Eulimnogammarus verrucosus]	17.236	7	24	0	1	644	70.4	5.34	0.979	0.978	0.938	1.045	1.005	1.056	0.965	1.03533	0.932067	0.0267318
1067096082	PREDICTED: uncharacterized protein LOC108667470 isoform X1 [Hyalella azteca]	0.355774	2	3	1	1	3654	414.4	7.28	0.983	0.985	0.939	1.024	1.056	1.012	0.969	1.03067	0.940168	0.0365057
1561999904	Fumarate hydratase, mitochondrial [Armadillidium vulgare]	10.6029	4	5	2	1	481	52.1	7.94	0.992	0.951	0.966	1.022	1.02	1.05	0.969667	1.03067	0.940815	0.0166704
1562035713	Plastin-3 [Armadillidium vulgare]	9.78441	4	7	4	1	603	68.2	6.21	0.967	0.982	0.968	1	1.022	1.062	0.972333	1.028	0.94585	0.0413992
1561979752	DEAD-box ATP-dependent RNA helicase 45 [Armadillidium vulgare]	11.5207	2	2	1	1	217	24.4	10.02	1.005	1.031	1.033	0.953	0.993	0.984	1.023	0.976667	1.04744	0.0373748
1562025745	26S protease regulatory subunit 4 [Armadillidium vulgare]	25.3378	5	10	4	1	296	32.8	6.09	1.046	1.007	1.041	0.937	0.999	0.969	1.03133	0.968333	1.06506	0.0439301
1561977687	Filamin-A, partial [Armadillidium vulgare]	13.8142	9	18	7	1	818	88.5	6.76	1.06	1.021	1.023	0.988	0.952	0.956	1.03467	0.965333	1.07182	0.0152543
1067092207	PREDICTED: valine--tRNA ligase-like [Hyalella azteca]	1.24777	1	1	1	1	1122	126.3	6.76	1.059	1.038	1.012	0.951	0.936	1.005	1.03633	0.964	1.07503	0.0442879
1562008953	T-complex protein 1 subunit gamma [Armadillidium vulgare]	11.2426	6	7	6	1	507	55.8	5.49	1.074	1.007	1.032	0.968	0.932	0.987	1.03767	0.962333	1.07828	0.0410362
1371969682	acetyl-CoA carboxylase, partial [Hirondellea gigas]	1.63582	3	3	3	1	2323	260.7	6.35	1.035	1.039	1.042	0.965	0.992	0.927	1.03867	0.961333	1.08044	0.015119
1562025679	NAD(P) transhydrogenase, mitochondrial [Armadillidium vulgare]	2.35043	2	2	2	1	936	99.9	6.76	1.062	1.039	1.019	0.917	0.964	0.998	1.04	0.959667	1.08371	0.039015
1562001488	Integrin-linked protein kinase-like protein pat-4 [Armadillidium vulgare]	4.22222	2	2	2	1	450	50.6	7.01	1.058	1.044	1.019	0.934	0.982	0.962	1.04033	0.959333	1.08443	0.0108162
1067080152	PREDICTED: twitchin-like isoform X1 [Hyalella azteca]	1.68776	15	25	10	1	8769	977.2	6.04	1.064	0.997	1.061	0.944	0.989	0.944	1.04067	0.959	1.08516	0.0368837
1067067547	PREDICTED: ATP synthase lipid-binding protein, mitochondrial-like [Hyalella azteca]	5.98291	1	3	1	1	117	12	9.85	1.081	0.991	1.053	0.96	0.943	0.973	1.04167	0.958667	1.08658	0.041266
1371969570	malate dehydrogenase, cytoplasmic-like [Hirondellea gigas]	9.69697	3	9	2	1	330	35	6.67	1.03	1.025	1.075	0.993	0.969	0.908	1.04333	0.956667	1.09059	0.0441016
1561988011	Elongation factor 2 [Armadillidium vulgare]	9.9537	9	13	9	1	864	96.4	6.8	1.06	0.998	1.073	0.979	0.943	0.947	1.04367	0.956333	1.09132	0.0276299
1561980093	Bifunctional trehalose-6-phosphate synthase/phosphatase [Armadillidium vulgare]	4.15225	3	5	3	1	867	97.7	7.58	1.049	1.011	1.071	0.977	0.932	0.959	1.04367	0.956	1.0917	0.0160057
1562031410	Ankyrin-3 [Armadillidium vulgare]	21.7295	7	7	7	1	451	48	7.84	1.056	1.025	1.053	0.96	0.923	0.983	1.04467	0.955333	1.09351	0.0112413
1561989757	Delta-1-pyrroline-5-carboxylate synthase [Armadillidium vulgare]	6.75991	4	5	4	1	858	94	6.74	1.057	0.986	1.097	0.938	0.961	0.962	1.04667	0.953667	1.09752	0.0495509
1067086591	PREDICTED: 40S ribosomal protein S2 [Hyalella azteca]	9.25267	3	4	3	1	281	30.5	10.08	1.099	1.003	1.059	0.929	0.965	0.945	1.05367	0.946333	1.11342	0.0225382
1561969448	Histone H2B [Armadillidium vulgare]	30.3448	5	12	3	1	145	16.2	10.36	1.064	1.045	1.056	0.91	0.979	0.947	1.055	0.945333	1.11601	0.00607766
1562027193	Basement membrane-specific heparan sulfate proteoglycan core protein, partial [Armadillidium vulgare]	3.11526	1	1	1	1	321	35.6	4.3	1.094	1.026	1.046	0.919	0.965	0.95	1.05533	0.944667	1.11715	0.0103866
1562014060	Talin-1 [Armadillidium vulgare]	1.91388	1	1	1	1	418	48.8	6.05	1.058	1.029	1.084	0.945	0.948	0.936	1.057	0.943	1.12089	0.00219382
1562034612	60S ribosomal protein L34 [Armadillidium vulgare]	4.27807	1	2	1	1	187	21	10.17	1.135	1.012	1.026	0.949	0.926	0.952	1.05767	0.942333	1.12239	0.0440055
1562026317	Laminin subunit beta-1 variant [Armadillidium vulgare]	2.73038	1	1	1	1	293	32.5	8.9	1.012	1.066	1.104	0.96	0.955	0.902	1.06067	0.939	1.12957	0.0200747
1067066447	PREDICTED: actin, muscle-type A2-like isoform X1 [Hyalella azteca]	22.6064	7	94	1	1	376	41.7	5.49	1.091	1.018	1.08	0.904	0.969	0.937	1.063	0.936667	1.13488	0.0127772
1067081800	PREDICTED: 2-oxoglutarate dehydrogenase, mitochondrial-like, partial [Hyalella azteca]	1.74419	2	2	2	1	1032	115.4	7.49	1.074	1.027	1.091	0.982	0.963	0.863	1.064	0.936	1.13675	0.0369817
1561982271	Aspartate aminotransferase, mitochondrial [Armadillidium vulgare]	6.13208	3	3	3	1	424	47.1	9.09	1.09	1.003	1.104	0.882	0.975	0.946	1.06567	0.934333	1.14056	0.0349527
1562027201	Titin [Armadillidium vulgare]	1.02708	1	1	1	1	1071	120.5	4.91	1.118	0.996	1.083	0.914	0.905	0.984	1.06567	0.934333	1.14056	0.0406333
1561971646	Actin-related protein 2/3 complex subunit 1A [Armadillidium vulgare]	3.2	1	1	1	1	375	41.5	8.37	1.121	1.018	1.06	0.882	1.001	0.919	1.06633	0.934	1.14168	0.0456043
1562031484	Enolase [Armadillidium vulgare]	23.6434	4	23	1	1	258	27.5	7.58	1.012	1.136	1.052	0.962	0.888	0.95	1.06667	0.933333	1.14286	0.036544
1561996773	Valine--tRNA ligase [Armadillidium vulgare]	0.857633	1	2	1	1	1166	133.2	7.03	1.107	1.033	1.062	0.91	0.914	0.974	1.06733	0.932667	1.14439	0.0107462
1371968743	mitochondrial 2-oxoglutarate/malate carrier protein-like, partial [Hirondellea gigas]	5.44218	1	2	1	1	294	31.7	9.5	1.019	1.03	1.153	0.952	0.906	0.94	1.06733	0.932667	1.14439	0.0405156
1561987635	Surfeit locus protein 4-like protein [Armadillidium vulgare]	3.7594	1	1	1	1	266	30.4	9.07	1.11	1.006	1.089	0.874	0.977	0.944	1.06833	0.931667	1.14669	0.0358474
1561996885	Mitochondrial-processing peptidase subunit beta [Armadillidium vulgare]	3.14233	2	5	2	1	541	61	7.93	1.102	0.981	1.124	0.917	0.957	0.92	1.069	0.931333	1.14782	0.0409536
1562031856	Glutamate dehydrogenase, mitochondrial [Armadillidium vulgare]	7.47253	3	3	1	1	455	50.5	6.99	1.078	1.046	1.091	0.991	0.943	0.852	1.07167	0.928667	1.15398	0.0290108
1067080876	PREDICTED: sodium/potassium-transporting ATPase subunit alpha-like [Hyalella azteca]	7.08955	2	5	1	1	268	30.2	7.49	1.089	1.049	1.08	0.845	0.994	0.943	1.07267	0.927333	1.15672	0.0327925
1562026890	Sodium/potassium-transporting ATPase subunit alpha [Armadillidium vulgare]	20.0943	17	39	5	1	1060	117.4	5.27	1.088	1.03	1.101	0.945	0.907	0.928	1.073	0.926667	1.15791	0.00391001
1371969264	elongation factor 1-alpha-like, partial [Hirondellea gigas]	9.52381	3	4	1	1	252	27.6	9.35	1.152	1.042	1.027	0.907	0.952	0.92	1.07367	0.926333	1.15905	0.0239994
1562026082	60S ribosomal protein L11-2 [Armadillidium vulgare]	8.93855	2	2	2	1	179	20.4	10.13	1.124	0.993	1.104	0.905	0.954	0.92	1.07367	0.926333	1.15905	0.0271056
1067085178	PREDICTED: succinate dehydrogenase [ubiquinone] flavoprotein subunit, mitochondrial-like [Hyalella azteca]	5.27108	3	4	1	1	664	72.4	6.81	1.08	1.016	1.127	0.982	0.899	0.896	1.07433	0.925667	1.1606	0.0254369
1371969057	aconitate hydratase, mitochondrial-like [Hirondellea gigas]	5.58376	5	7	3	1	788	85.3	6.8	1.116	1.008	1.1	0.892	0.958	0.927	1.07467	0.925667	1.16097	0.0182644
1561968815	Methionine aminopeptidase 1 [Armadillidium vulgare]	2.4024	1	1	1	1	333	37.8	6.46	1.157	1.029	1.04	0.91	0.899	0.965	1.07533	0.924667	1.16294	0.030149
1371956571	ribosomal protein L9, partial [Hirondellea gigas]	5	1	1	1	1	200	22.4	9.89	1.11	1.034	1.084	0.861	0.968	0.942	1.076	0.923667	1.16492	0.0177271
1371968479	septin-1-like, partial [Hirondellea gigas]	2.11268	1	1	1	1	426	47.2	7.5	1.029	1.098	1.103	0.831	0.967	0.972	1.07667	0.923333	1.16606	0.0420128
1067080223	PREDICTED: PDZ and LIM domain protein 5-like [Hyalella azteca]	1.16429	1	1	1	1	773	86.7	8.35	1.081	1.003	1.149	0.882	0.929	0.954	1.07767	0.921667	1.16926	0.0297232
1562025028	Ras-like GTP-binding protein Rho1, partial [Armadillidium vulgare]	23.5849	4	5	4	1	212	23.8	7.11	1.071	1.044	1.121	0.905	0.95	0.91	1.07867	0.921667	1.17034	0.00416575
1561985388	Ras-related protein Rab-2 [Armadillidium vulgare]	3.68852	2	2	2	1	488	52.1	6.86	1.048	1.099	1.09	0.887	0.891	0.985	1.079	0.921	1.17155	0.0114263
1562031686	Endophilin-B1 [Armadillidium vulgare]	2.76817	1	1	1	1	289	32.2	5.53	1.156	1.055	1.026	0.87	0.936	0.957	1.079	0.921	1.17155	0.0288665
1067100289	PREDICTED: ADP-ribosylation factor 1 [Hyalella azteca]	18.6813	3	3	3	1	182	20.7	6.58	1.097	1.005	1.135	0.953	0.843	0.967	1.079	0.921	1.17155	0.04538
1561989251	60S ribosomal protein L30 [Armadillidium vulgare]	14.2857	1	2	1	1	112	12.3	9.69	1.175	1.028	1.037	0.916	0.976	0.867	1.08	0.919667	1.17434	0.0483342
1067080243	PREDICTED: ADP/ATP translocase 3-like [Hyalella azteca]	5.51948	2	4	1	1	308	33.6	9.77	1.041	1.063	1.139	0.928	0.881	0.948	1.081	0.919	1.17628	0.0105313
1561977436	putative aconitate hydratase, mitochondrial, partial [Armadillidium vulgare]	6.92308	3	6	1	1	390	43	8.73	1.107	1.064	1.073	0.855	1.005	0.895	1.08133	0.918333	1.1775	0.0251449
1562027208	Titin, partial [Armadillidium vulgare]	5.78009	22	47	16	1	4429	498.8	5.78	1.089	1.065	1.092	0.923	0.926	0.904	1.082	0.917667	1.17908	0.000115883
1067080981	PREDICTED: ATP-dependent RNA helicase dbp2-like isoform X1 [Hyalella azteca]	4.27807	3	3	2	1	748	82	9.29	1.129	1.041	1.079	0.914	0.9	0.937	1.083	0.917	1.18103	0.0038846
1562010461	Clathrin heavy chain 1 [Armadillidium vulgare]	6.88623	3	3	2	1	668	74.9	6.49	1.098	1.075	1.077	0.869	0.871	1.01	1.08333	0.916667	1.18182	0.0242829
164632863	masquerade-like protein, partial [Armadillidium vulgare]	5.78947	1	4	1	1	190	21.3	6.92	1.086	1.056	1.111	0.995	0.877	0.875	1.08433	0.915667	1.1842	0.0168674
1067101286	PREDICTED: protein transport protein Sec61 subunit alpha [Hyalella azteca]	1.88285	1	1	1	1	478	52.5	8.24	1.162	0.998	1.094	0.881	0.931	0.934	1.08467	0.915333	1.185	0.0286303
1562005386	Elongation factor 1-alpha 1 [Armadillidium vulgare]	5.20607	3	4	0	1	461	51	8.95	1.155	0.986	1.114	0.88	0.956	0.908	1.085	0.914667	1.18622	0.0373726
1371969450	rab GDP dissociation inhibitor alpha-like [Hirondellea gigas]	8.98876	4	6	2	1	445	49.9	5.68	1.11	1.055	1.093	0.863	0.932	0.947	1.086	0.914	1.18818	0.00489638
262304417	clathrin heavy chain, partial [Armadillidium vulgare]	20.3883	6	8	3	1	309	35.5	5.45	1.093	1.053	1.115	0.863	0.952	0.924	1.087	0.913	1.19058	0.00550998
1562000034	Cdc42-like protein [Armadillidium vulgare]	20.9424	4	5	3	1	191	21.4	6.55	1.122	1.039	1.1	0.898	0.95	0.891	1.087	0.913	1.19058	0.00496627
1562034976	ADP/ATP translocase 2 [Armadillidium vulgare]	12.1795	4	6	3	1	312	33.7	9.8	1.13	1.012	1.119	0.881	0.979	0.878	1.087	0.912667	1.19102	0.0254722
1561993252	40S ribosomal protein S21 [Armadillidium vulgare]	10.9756	1	1	1	1	82	9.2	7.08	1.116	1.028	1.12	0.895	0.95	0.89	1.088	0.911667	1.19342	0.0077805
1562009016	Plasma membrane calcium-transporting ATPase 3 [Armadillidium vulgare]	2.41265	2	4	2	1	1202	132.5	6.07	1.079	1.069	1.117	0.882	0.877	0.976	1.08833	0.911667	1.19378	0.00751285
1561973971	Histone H1.0 [Armadillidium vulgare]	3.76344	1	1	1	1	186	19.7	10.71	1.308	1.039	1.038	0.901	0.885	0.829	1.12833	0.871667	1.29446	0.050005
1562009230	DnaJ-like protein subfamily A member 2 [Armadillidium vulgare]	1.50376	1	1	1	1	399	44.2	7.02	1.002	0.878	0.915	1.121	1.005	1.079	0.931667	1.06833	0.872075	0.0522795
1561968335	Tubulin alpha chain [Armadillidium vulgare]	14.0056	4	11	1	1	357	39.7	4.94	0.93	0.997	0.921	1.107	1.017	1.028	0.949333	1.05067	0.903553	0.0524667
1562000860	V-type proton ATPase subunit B [Armadillidium vulgare]	6.917	3	4	3	1	506	56.4	5.78	1.072	0.997	1.081	0.903	0.957	0.99	1.05	0.95	1.10526	0.0530065
1067096463	PREDICTED: guanine nucleotide-binding protein G(I)/G(S)/G(T) subunit beta-1 [Hyalella azteca]	9.70588	3	3	3	1	340	37.3	6.18	1.176	0.966	1.139	0.954	0.891	0.874	1.09367	0.906333	1.20669	0.0535748
1561973397	Nascent polypeptide-associated complex subunit alpha [Armadillidium vulgare]	6.54206	1	2	1	1	214	22.6	4.91	1.014	0.892	0.938	1.079	1.028	1.049	0.948	1.052	0.901141	0.0541278
1371966560	hemocyanin subunit 1, partial [Hirondellea gigas]	1.18168	1	1	1	1	677	77.9	5.54	0.185	0.188	0.17	3.014	1.415	1.028	0.181	1.819	0.0995052	0.0543973
1067082904	PREDICTED: venom peptide isomerase heavy chain-like [Hyalella azteca]	2.22841	1	1	1	1	359	37.7	7.71	0.996	0.644	0.836	1.14	1.33	1.053	0.825333	1.17433	0.70281	0.055611
1561971619	Protein ROP [Armadillidium vulgare]	2.45902	1	1	1	1	488	55.7	7.02	1.064	1.018	1.042	0.921	0.941	1.014	1.04133	0.958667	1.08623	0.0571516
1067072463	PREDICTED: eukaryotic initiation factor 4A-III [Hyalella azteca]	7.71144	3	3	3	1	402	45.9	6.24	0.949	0.955	0.949	0.98	1.107	1.06	0.951	1.049	0.906578	0.0576005
1562024328	40S ribosomal protein S6 [Armadillidium vulgare]	2.68007	2	3	2	1	597	64.9	10.46	1.089	0.974	1.097	0.939	0.944	0.959	1.05333	0.947333	1.11189	0.0577157
1067069917	PREDICTED: LOW QUALITY PROTEIN: ryanodine receptor-like, partial [Hyalella azteca]	0.85796	1	1	1	1	1049	117.2	4.94	1.188	1.018	1.046	0.987	0.893	0.868	1.084	0.916	1.18341	0.0582103
1371968967	dihydrolipoyl dehydrogenase, mitochondrial-like, partial [Hirondellea gigas]	1.84162	1	2	1	1	543	57.8	6.48	1.067	0.992	1.06	0.928	0.96	0.993	1.03967	0.960333	1.08261	0.0594474
1562000942	Catenin alpha [Armadillidium vulgare]	1.38728	1	1	1	1	865	96.6	7.83	0.924	0.777	0.778	1.42	1.079	1.022	0.826333	1.17367	0.704061	0.059953
1562028665	Programmed cell death 6-interacting protein [Armadillidium vulgare]	1.03211	1	1	1	1	872	96.4	5.97	1.062	1.019	1.119	0.854	1.001	0.945	1.06667	0.933333	1.14286	0.0614142
1067097140	PREDICTED: adenosylhomocysteinase-like isoform X2 [Hyalella azteca]	7.37327	3	9	2	1	434	48	6.42	1	0.867	0.968	1.06	1.079	1.027	0.945	1.05533	0.895452	0.0617055
1067066455	PREDICTED: actin, muscle-like isoform X1 [Hyalella azteca]	28.4574	9	97	1	1	376	41.6	5.39	1.021	1.125	1.079	1.014	0.841	0.92	1.075	0.925	1.16216	0.0619567
1371969356	heat shock protein 70 cognate 3 [Hirondellea gigas]	8.66261	5	10	1	1	658	72.7	5.1	0.922	0.913	1.009	1.097	1.054	1.005	0.948	1.052	0.901141	0.0622751
1067092495	PREDICTED: phosphoglycerate mutase 2-like [Hyalella azteca]	14.9606	4	16	2	1	254	28.6	6.81	0.975	0.936	0.996	1.064	1.014	1.014	0.969	1.03067	0.940168	0.0635923
1561978526	Succinate dehydrogenase [ubiquinone] flavoprotein subunit, mitochondrial [Armadillidium vulgare]	5.95238	3	3	1	1	504	54.5	6.81	1.078	0.999	1.066	0.898	0.963	0.996	1.04767	0.952333	1.10011	0.0654627
1561991980	Ras-related protein Rab-10 [Armadillidium vulgare]	14.0127	2	2	1	1	157	17.8	8.1	1.064	1.006	1.082	1.016	0.921	0.911	1.05067	0.949333	1.10674	0.0668898
1562028895	Spliceosome RNA helicase Ddx39b [Armadillidium vulgare]	13.3929	3	4	1	1	224	25.2	6.34	0.965	1.106	1.213	0.945	0.859	0.912	1.09467	0.905333	1.20913	0.067534
1067093630	PREDICTED: serine/arginine-rich splicing factor 3-like [Hyalella azteca]	6.08108	1	1	1	1	148	17.2	11.63	0.918	0.816	0.983	0.977	1.142	1.163	0.905667	1.094	0.827849	0.0690616
1562032928	Serine/threonine-protein phosphatase 2A 56 kDa regulatory subunit alpha isoform [Armadillidium vulgare]	7.14286	2	3	2	1	364	42	6.73	1.062	0.983	1.064	0.983	0.941	0.968	1.03633	0.964	1.07503	0.0694635
1371962246	cyclin-dependent serine/threonine-protein kinase DDB_G0272797/DDB_G0274007, partial [Hirondellea gigas]	10.4294	1	1	1	1	163	18.7	5.33	0.824	0.544	0.707	0.886	1.324	1.714	0.691667	1.308	0.528797	0.0711843
1562032674	Tubulin alpha-3 chain [Armadillidium vulgare]	39.7778	13	28	1	1	450	49.8	5.15	1	0.946	0.928	0.99	1.057	1.08	0.958	1.04233	0.919092	0.07138
1371969388	guanine nucleotide-binding protein subunit beta-2-like 1 [Hirondellea gigas]	19.0625	4	8	4	1	320	36	7.94	1.027	1.081	1.119	1.023	0.921	0.828	1.07567	0.924	1.16414	0.0716877
1067106449	PREDICTED: ras-related protein Rab-14 [Hyalella azteca]	6.33484	1	1	1	1	221	24.3	6.2	0.95	0.745	0.966	1.158	0.993	1.189	0.887	1.11333	0.796707	0.0729296
1562035659	Ras-related protein Rac1 [Armadillidium vulgare]	18.2292	3	4	2	1	192	21.4	8.32	1.076	0.981	1.052	0.969	0.977	0.944	1.03633	0.963333	1.07578	0.0730014
1371969398	40S ribosomal protein S3a-like, partial [Hirondellea gigas]	8.13008	1	1	1	1	123	14.1	9.01	1.153	0.959	1.167	0.831	0.938	0.952	1.093	0.907	1.20507	0.0737024
1561994957	Protein transport protein Sec23A [Armadillidium vulgare]	2.07612	1	1	1	1	867	97.7	6.21	0.832	0.847	0.995	0.978	1.233	1.114	0.891333	1.10833	0.804211	0.0738478
1562002058	putative maltase, partial [Armadillidium vulgare]	3.0581	1	1	1	1	327	38.4	6.44	1.009	0.876	0.899	1.033	1.024	1.159	0.928	1.072	0.865672	0.0739083
1067087185	PREDICTED: UTP--glucose-1-phosphate uridylyltransferase-like isoform X1 [Hyalella azteca]	7.08661	3	6	2	1	508	57	6.77	0.995	0.849	0.94	0.99	1.095	1.131	0.928	1.072	0.865672	0.0743922
1371969810	V-type proton ATPase catalytic subunit A-like [Hirondellea gigas]	6.91318	4	6	2	1	622	69.1	5.44	1.078	0.971	1.123	0.967	0.91	0.95	1.05733	0.942333	1.12204	0.0752645
1562035356	40S ribosomal protein S3 [Armadillidium vulgare]	14.1762	3	7	0	1	261	28.8	9.77	1.022	0.996	1.115	0.938	0.969	0.959	1.04433	0.955333	1.09316	0.0752745
1067067471	PREDICTED: ras-related protein Rab-8A-like [Hyalella azteca]	5.04587	1	2	1	1	218	24.2	8.7	1.146	0.959	1.12	0.889	0.918	0.969	1.075	0.925333	1.16174	0.0763019
1067099352	PREDICTED: ATP-dependent RNA helicase Ddx1-like [Hyalella azteca]	1.22449	1	1	1	1	735	81.2	6.58	0.976	0.962	0.982	1.006	1.07	1.004	0.973333	1.02667	0.948052	0.0765234
1067095903	PREDICTED: delta-1-pyrroline-5-carboxylate dehydrogenase, mitochondrial-like [Hyalella azteca]	7.59717	4	9	2	1	566	62.4	7.14	0.96	0.898	0.979	1.129	1.035	0.999	0.945667	1.05433	0.896933	0.0767069
1562029208	Synaptobrevin [Armadillidium vulgare]	21.5686	3	3	3	1	153	17	6.84	0.955	0.85	0.9	0.945	1.16	1.191	0.901667	1.09867	0.820692	0.0767285
1241822728	mitochondrial pyruvate kinase [Gammarus lacustris]	12.8544	6	18	6	1	529	57.7	6.61	1.026	1.003	1.023	0.96	0.984	1.004	1.01733	0.982667	1.03528	0.0767891
1561977311	Heterogeneous nuclear ribonucleoprotein 27C [Armadillidium vulgare]	2.51397	1	1	1	1	358	38.5	8.92	1.215	1.025	1.09	1.005	0.75	0.914	1.11	0.889667	1.24766	0.0771895
1371969991	glutamine synthetase-like [Hirondellea gigas]	2.1978	1	1	1	1	364	41	5.96	0.965	1.098	1.203	0.918	0.855	0.96	1.08867	0.911	1.19502	0.0777627
1371966987	eukaryotic translation initiation factor 5B-like, partial [Hirondellea gigas]	1.30916	1	1	1	1	993	110.4	5.22	0.912	0.946	0.859	0.974	1.074	1.235	0.905667	1.09433	0.827597	0.078131
1067095955	PREDICTED: tubulin alpha-8 chain-like [Hyalella azteca]	18.7919	7	12	0	1	447	50.2	5.19	1.011	0.901	0.938	0.998	1.06	1.092	0.95	1.05	0.904762	0.0782311
1562030468	26S proteasome non-ATPase regulatory subunit 2 [Armadillidium vulgare]	1.98413	1	2	1	1	504	54.7	6.04	1.13	1.011	1.05	0.869	1.012	0.928	1.06367	0.936333	1.13599	0.0789366
1067092830	PREDICTED: 26S proteasome non-ATPase regulatory subunit 14-like [Hyalella azteca]	4.18006	1	2	1	1	311	34.4	6.32	0.98	0.882	0.957	1.019	1.018	1.146	0.939667	1.061	0.885642	0.07912
1561976362	Tubulin alpha-3 chain [Armadillidium vulgare]	31.9209	9	20	1	1	354	39.3	5.07	0.894	0.987	0.937	1.144	1.047	0.991	0.939333	1.06067	0.885607	0.0805472
1067076088	PREDICTED: ATP-dependent RNA helicase DDX3X-like isoform X1 [Hyalella azteca]	3.88889	2	2	2	1	720	78.3	9.13	1.104	0.995	1.018	0.971	0.959	0.953	1.039	0.961	1.08117	0.0809524
1067067755	PREDICTED: glucose-6-phosphate 1-epimerase-like [Hyalella azteca]	4.7619	1	1	1	1	231	26.2	7.78	1.211	0.974	1.08	0.844	0.943	0.948	1.08833	0.911667	1.19378	0.0819583
1561975964	ATP-binding cassette sub-family E member 1 [Armadillidium vulgare]	4.32526	2	2	2	1	578	65.6	6.93	1.153	0.956	1.099	0.909	0.936	0.948	1.06933	0.931	1.14859	0.0820599
1067099312	PREDICTED: 40S ribosomal protein S19-like [Hyalella azteca]	4.52261	1	2	1	1	199	22.1	10.74	0.808	0.869	0.923	1.352	1.05	0.997	0.866667	1.133	0.764931	0.0823036
1067074062	PREDICTED: troponin T, skeletal muscle-like [Hyalella azteca]	4.53333	2	3	1	1	375	44	4.88	0.991	0.825	0.937	1.055	1.183	1.009	0.917667	1.08233	0.84786	0.0824031
1371969751	beta-actin, partial [Hirondellea gigas]	36.2205	3	10	1	1	127	14.2	7.78	1.004	1.259	1.392	1.022	0.502	0.821	1.21833	0.781667	1.55864	0.0824556
1562029749	Prostaglandin E synthase 3 [Armadillidium vulgare]	4.4843	1	1	1	1	223	26.8	8.82	1.021	0.8	0.938	1.048	1.135	1.057	0.919667	1.08	0.851543	0.0841823
1067064255	PREDICTED: guanine nucleotide-binding protein G(q) subunit alpha isoform X1 [Hyalella azteca]	2.54958	1	1	1	1	353	41.5	5.31	1.112	0.983	1.078	0.961	0.879	0.987	1.05767	0.942333	1.12239	0.0843865
1562005557	RB1-inducible coiled-coil protein 1 [Armadillidium vulgare]	1.53621	1	2	1	1	1367	158.8	5.59	0.968	0.67	0.72	0.887	1.37	1.385	0.786	1.214	0.647446	0.084792
1562011096	hypothetical protein Avbf_14182 [Armadillidium vulgare]	7.3913	1	1	1	1	230	25.2	4.64	1.009	0.693	0.688	0.918	1.318	1.373	0.796667	1.203	0.662233	0.0850239
1562035516	Glutamine--fructose-6-phosphate aminotransferase [isomerizing] 2 [Armadillidium vulgare]	4.35511	2	2	2	1	597	67	6.77	0.978	0.87	0.973	0.984	1.112	1.082	0.940333	1.05933	0.887665	0.0851172
1371970177	actin-5, muscle-specific-like, partial [Hirondellea gigas]	48.8304	13	160	2	1	342	37.8	5.36	0.99	1.174	1.027	0.952	0.925	0.933	1.06367	0.936667	1.13559	0.088864
1562009627	Fructose-1,6-bisphosphatase 1 [Armadillidium vulgare]	11.3793	3	5	2	1	290	31.6	6.55	1.131	1.208	1.006	1.053	0.822	0.78	1.115	0.885	1.25989	0.0899204
1067105175	PREDICTED: adenylate kinase isoenzyme 1-like [Hyalella azteca]	15.2709	3	4	0	1	203	22.2	7.3	0.988	0.975	0.975	0.987	1.049	1.026	0.979333	1.02067	0.959504	0.0904733
1067076335	PREDICTED: cAMP-dependent protein kinase regulatory subunit-like isoform X1 [Hyalella azteca]	5.57029	2	3	1	1	377	42.2	5	0.989	0.904	0.916	0.963	1.102	1.126	0.936333	1.06367	0.880288	0.090511
1067096174	PREDICTED: ferritin-like [Hyalella azteca]	8.60927	1	4	1	1	151	17.3	5.35	1.011	0.934	0.979	1.035	1.019	1.022	0.974667	1.02533	0.950585	0.0910432
1561992211	NADH-cytochrome b5 reductase 2 [Armadillidium vulgare]	2.64026	1	1	1	1	303	34.2	9.06	0.746	0.853	0.747	0.851	1.293	1.51	0.782	1.218	0.642036	0.0914386
1562000299	Actin-3, muscle-specific [Armadillidium vulgare]	38.8112	9	119	1	1	286	31.7	5.06	1.005	1.004	1.133	0.96	0.947	0.951	1.04733	0.952667	1.09937	0.0925268
1562034127	Sodium/calcium exchanger 2 [Armadillidium vulgare]	0.91638	1	1	1	1	873	96	5.17	1.184	0.937	1.145	0.872	0.956	0.907	1.08867	0.911667	1.19415	0.0926168
1562009444	NEDD8-activating enzyme E1 regulatory subunit [Armadillidium vulgare]	1.67598	1	1	1	1	537	60.7	5.57	1.011	0.853	0.966	1.087	1.016	1.067	0.943333	1.05667	0.892744	0.0927274
1562024023	putative isocitrate dehydrogenase [NAD] subunit alpha, mitochondrial, partial [Armadillidium vulgare]	4.92611	1	1	1	1	203	22.6	8.9	1.066	1.011	1.042	1.021	0.909	0.952	1.03967	0.960667	1.08223	0.0951245
1562034778	T-complex protein 1 subunit delta [Armadillidium vulgare]	10.4796	6	7	1	1	563	61.3	7.65	1.03	0.99	1.078	0.98	0.987	0.936	1.03267	0.967667	1.06717	0.0964131
1371967339	alpha-N-acetylgalactosaminidase-like, partial [Hirondellea gigas]	2.94737	1	1	1	1	475	53.7	6.09	1.011	0.793	0.961	1.055	1.042	1.138	0.921667	1.07833	0.854714	0.0966772
1562012114	Proteasome subunit alpha type-2 [Armadillidium vulgare]	9.80392	2	2	2	1	204	22.7	7.43	1.071	1.032	1.059	0.912	0.884	1.042	1.054	0.946	1.11416	0.0969985
1371963259	alpha-soluble NSF attachment protein-like [Hirondellea gigas]	7.53425	2	2	1	1	292	32.8	5.91	0.98	0.694	0.739	0.942	1.158	1.487	0.804333	1.19567	0.672707	0.0974841
1067075505	PREDICTED: septin-2-like [Hyalella azteca]	2.45902	1	1	1	1	488	56.3	6.96	0.818	0.881	0.941	0.968	1.068	1.324	0.88	1.12	0.785714	0.0983376
1371969644	actin-57B-like, partial [Hirondellea gigas]	37.9808	6	41	1	1	208	23	5.43	1.341	1.023	1.15	1.064	0.808	0.613	1.17133	0.828333	1.41408	0.0986446
1371964432	exportin-2-like [Hirondellea gigas]	0.823893	1	1	1	1	971	109.3	5.68	1.015	0.94	0.953	1.01	1.018	1.064	0.969333	1.03067	0.940492	0.0986723
1067103896	PREDICTED: C-1-tetrahydrofolate synthase, cytoplasmic-like isoform X1 [Hyalella azteca]	0.855615	1	1	1	1	935	100.1	6.86	1.038	0.89	0.899	1.018	1.102	1.052	0.942333	1.05733	0.891236	0.0991737
1067085429	PREDICTED: titin-like [Hyalella azteca]	2.80565	13	26	5	1	4883	549.8	6.01	1.09	0.993	1.023	0.933	0.986	0.976	1.03533	0.965	1.07288	0.0997786
1067069421	PREDICTED: serine/threonine-protein phosphatase PP1-beta catalytic subunit [Hyalella azteca]	5.53846	2	2	1	1	325	37.2	5.97	0.682	1.022	0.903	0.988	1.192	1.212	0.869	1.13067	0.768573	0.0998295
1371958439	ribosomal protein L26 [Hirondellea gigas]	5.55556	1	1	1	1	144	16.8	10.7	1.065	0.969	1.148	0.972	0.893	0.953	1.06067	0.939333	1.12917	0.100084
1067067753	PREDICTED: phosphatidylinositol-binding clathrin assembly protein LAP-like [Hyalella azteca]	1.77936	1	1	1	1	562	60.5	5.48	0.976	1.195	1.043	0.897	0.933	0.956	1.07133	0.928667	1.15363	0.100367
1067091259	PREDICTED: ruvB-like 2 [Hyalella azteca]	4.74138	2	3	2	1	464	51	5.39	0.971	0.864	1.019	1.052	1.042	1.053	0.951333	1.049	0.906895	0.1007
1067074760	PREDICTED: peroxiredoxin-1-like [Hyalella azteca]	5.78512	1	2	1	1	242	26.6	7.01	0.736	0.903	0.93	1.302	1.223	0.906	0.856333	1.14367	0.748761	0.10103
1562032611	hypothetical protein Avbf_04217 [Armadillidium vulgare]	3.58744	1	2	1	1	446	50.9	9.54	1.006	1.03	1.076	0.932	1.02	0.935	1.03733	0.962333	1.07794	0.101567
1067074357	PREDICTED: tubulin alpha-1A chain [Hyalella azteca]	32.5991	11	24	0	1	454	50.4	5.06	1.055	0.845	0.877	1.029	1.119	1.075	0.925667	1.07433	0.86162	0.101947
1067098150	PREDICTED: kinesin light chain-like isoform X1 [Hyalella azteca]	1.70648	1	2	1	1	586	65.6	6.73	1.014	0.908	0.967	1.015	1.025	1.072	0.963	1.03733	0.928342	0.103278
1562032068	PHD finger protein 3 [Armadillidium vulgare]	0.697051	1	1	1	1	1865	209.3	8.88	0.93	0.973	0.785	1.004	1.264	1.043	0.896	1.10367	0.811839	0.103763
1562013591	60S ribosomal protein L7 [Armadillidium vulgare]	5.22088	1	1	1	1	249	29	10.87	0.941	0.722	0.901	0.961	1.102	1.374	0.854667	1.14567	0.745999	0.103795
1562030758	1,4-alpha-glucan-branching enzyme [Armadillidium vulgare]	2.09268	1	2	1	1	669	76.4	6.51	1.007	1.257	1.007	0.954	0.89	0.884	1.09033	0.909333	1.19905	0.103941
1562033712	Nuclear pore complex protein Nup93, partial [Armadillidium vulgare]	1.16959	1	1	1	1	684	76.8	6.87	1.098	1.101	1.132	0.682	1.021	0.966	1.11033	0.889667	1.24803	0.104875
1561976764	40S ribosomal protein S3a [Armadillidium vulgare]	20.1342	3	6	3	1	149	16.9	9.01	1.022	1.017	1.16	1.017	0.91	0.873	1.06633	0.933333	1.1425	0.105135
1561990216	putative aminopeptidase NPEPL1 [Armadillidium vulgare]	24.2775	3	7	1	1	173	19	6.1	0.929	0.819	1.024	1.019	1.159	1.05	0.924	1.076	0.858736	0.105332
1562026527	Protein singed [Armadillidium vulgare]	5.11111	2	2	2	1	450	50.2	6.37	0.961	0.9	0.991	1.045	1.119	0.984	0.950667	1.04933	0.905972	0.105471
1562024499	Adenylate kinase isoenzyme 1 [Armadillidium vulgare]	22.1239	3	5	1	1	113	13	6.57	0.996	0.929	0.902	1.126	0.965	1.082	0.942333	1.05767	0.890955	0.106604
1561971457	Proteasome subunit alpha type-4 [Armadillidium vulgare]	15.8228	2	2	2	1	158	17.6	9.07	0.971	0.846	0.989	1.018	1.151	1.025	0.935333	1.06467	0.878522	0.106773
1371969849	myosin regulatory light chain sqh-like, partial [Hirondellea gigas]	9.94475	1	1	1	1	181	20.7	4.84	0.839	0.761	0.694	0.838	1.257	1.611	0.764667	1.23533	0.618996	0.107151
1067066378	PREDICTED: heat shock 70 kDa protein cognate 4-like [Hyalella azteca]	14.9068	7	15	0	1	644	70.6	5.66	1.01	0.937	0.986	1.016	1.027	1.025	0.977667	1.02267	0.955997	0.10731
1562030568	Cytosolic purine 5'-nucleotidase, partial [Armadillidium vulgare]	1.69851	1	1	1	1	471	54.6	7.56	0.926	0.886	0.992	0.955	1.125	1.117	0.934667	1.06567	0.877072	0.107771
1067079987	PREDICTED: enoyl-CoA hydratase, mitochondrial-like [Hyalella azteca]	12.2517	3	5	3	1	302	32.7	8.88	1.07	0.968	1.074	0.978	0.967	0.943	1.03733	0.962667	1.07756	0.108078
1561970257	hypothetical protein Avbf_17690 [Armadillidium vulgare]	24.7967	5	7	4	1	246	27.5	6.95	1.04	1.017	1.078	1.027	0.949	0.89	1.045	0.955333	1.09386	0.108172
1371965669	peptidyl-prolyl cis-trans isomerase FKBP1B-like, partial [Hirondellea gigas]	11.6505	1	2	1	1	103	11	8.72	0.892	0.799	0.952	0.979	1.05	1.329	0.881	1.11933	0.787076	0.108505
1561987719	Heterogeneous nuclear ribonucleoprotein 87F [Armadillidium vulgare]	4.43213	2	2	2	1	361	38.5	8.98	1.027	1.074	1.256	1.061	0.836	0.746	1.119	0.881	1.27015	0.111324
1067078665	PREDICTED: ras-related protein Rab-5B-like [Hyalella azteca]	9.86547	2	3	2	1	223	23.9	7.77	1.023	0.997	1.038	0.957	0.977	1.008	1.01933	0.980667	1.03943	0.112478
1371969993	glycogen phosphorylase-like [Hirondellea gigas]	8.60849	7	15	6	1	848	97.7	6.61	1.042	1.09	0.973	0.952	0.97	0.973	1.035	0.965	1.07254	0.112969
1067077639	PREDICTED: coatomer subunit gamma-2-like [Hyalella azteca]	1	1	1	1	1	900	98	5.52	1.086	1.014	1.009	0.965	0.918	1.008	1.03633	0.963667	1.07541	0.11351
1561972850	Collagen alpha-2(I) chain [Armadillidium vulgare]	1.07599	1	2	1	1	1487	150.3	5.36	0.994	1.34	1.363	1.158	0.616	0.529	1.23233	0.767667	1.6053	0.113622
1067069257	PREDICTED: glucose-6-phosphate 1-dehydrogenase-like isoform X2 [Hyalella azteca]	2.77264	2	2	2	1	541	61.6	7.08	1.074	1.001	1.073	0.879	1.026	0.947	1.04933	0.950667	1.10379	0.113629
1562026092	Heat shock protein 26 [Armadillidium vulgare]	2.55102	1	1	1	1	392	43.9	9.07	0.957	1.011	0.902	1.098	1.034	0.998	0.956667	1.04333	0.916933	0.113813
270037147	elongation factor-1 alpha, partial [Cyamus ovalis]	3.52423	2	2	1	1	454	50	9.03	1.128	1.073	0.973	0.877	0.953	0.997	1.058	0.942333	1.12274	0.113816
1562024874	Sarcoplasmic calcium-binding protein 1 [Armadillidium vulgare]	12.1053	2	2	2	1	190	21.8	4.82	1.138	0.94	1.131	0.908	0.979	0.904	1.06967	0.930333	1.14977	0.114679
1562028901	Actin-interacting protein 1 [Armadillidium vulgare]	4.70588	1	1	1	1	170	18.8	7.21	1.07	1.073	1.039	0.85	1.052	0.917	1.06067	0.939667	1.12877	0.115632
1562027206	hypothetical protein Avbf_00050 [Armadillidium vulgare]	0.377477	1	3	1	1	3179	353.2	4.45	0.983	0.797	0.852	0.903	1.23	1.236	0.877333	1.123	0.781241	0.11663
1067100103	PREDICTED: dihydropteridine reductase-like [Hyalella azteca]	3.82979	1	1	1	1	235	24.6	7.43	0.962	0.879	0.989	0.992	1.146	1.032	0.943333	1.05667	0.892744	0.116644
1067067289	PREDICTED: LOW QUALITY PROTEIN: uncharacterized protein LOC108674277 [Hyalella azteca]	1.50565	1	4	1	1	797	91.9	7.06	0.972	0.786	0.861	0.897	1.263	1.221	0.873	1.127	0.774623	0.117447
1067089448	PREDICTED: uncharacterized protein F54F2.9-like [Hyalella azteca]	1.4433	1	2	1	1	485	56.3	5.64	0.898	1.052	0.811	1.129	1.004	1.106	0.920333	1.07967	0.852424	0.118065
1562034804	Moesin/ezrin/radixin-like protein 1 [Armadillidium vulgare]	5.20231	3	4	2	1	519	62	6.09	1.051	0.991	1.044	1.003	0.982	0.93	1.02867	0.971667	1.05866	0.118934
1562031586	Small nuclear ribonucleoprotein G [Armadillidium vulgare]	15.625	1	1	1	1	64	7.1	7.25	1.035	1.242	1.238	1.148	0.688	0.65	1.17167	0.828667	1.41392	0.120034
1067075469	PREDICTED: rRNA 2'-O-methyltransferase fibrillarin-like [Hyalella azteca]	2.20126	1	2	1	1	318	33.6	9.98	0.982	1.161	1.29	1.084	0.784	0.699	1.14433	0.855667	1.33736	0.121049
1371970270	glyceraldehyde-3-phosphate dehydrogenase [Hirondellea gigas]	12.3188	2	5	1	1	276	29.5	6.01	1.237	1.009	1.078	1.057	0.858	0.761	1.108	0.892	1.24215	0.121582
1371961075	sorting nexin-6-like, partial [Hirondellea gigas]	2.57611	1	1	1	1	427	49	7.06	0.817	0.645	0.896	1.237	0.845	1.56	0.786	1.214	0.647446	0.1231
1050792096	lysyl-tRNA synthetase, partial [Paraplatyarthrus sp. 9 MJ-2016]	6.10687	1	1	1	1	262	30.3	4.86	0.781	0.728	1.048	1.047	1.018	1.377	0.852333	1.14733	0.742882	0.124014
1067085913	PREDICTED: serine-threonine kinase receptor-associated protein-like [Hyalella azteca]	10.061	2	3	2	1	328	35.5	6.04	0.941	0.934	1.016	1.036	1.083	0.99	0.963667	1.03633	0.929881	0.125022
1562035312	Calcium uniporter protein, mitochondrial [Armadillidium vulgare]	6.54206	1	1	1	1	214	25	8.84	1.052	1.125	1.064	1.073	0.883	0.804	1.08033	0.92	1.17428	0.125447
1067062319	PREDICTED: calcium-binding mitochondrial carrier protein Aralar1-like [Hyalella azteca]	1.36612	1	1	1	1	732	79.8	8	0.977	0.903	1.008	1	1.079	1.033	0.962667	1.03733	0.928021	0.125645
1067100161	PREDICTED: peptidyl-prolyl cis-trans isomerase 5-like [Hyalella azteca]	3.33333	1	2	1	1	210	22.7	8.53	0.995	0.836	0.996	1.072	1.004	1.098	0.942333	1.058	0.890674	0.126608
1067085594	PREDICTED: clathrin heavy chain 1-like [Hyalella azteca]	5.2381	8	9	4	1	1680	191.9	5.8	1.083	0.961	1.089	0.915	0.975	0.976	1.04433	0.955333	1.09316	0.127087
1067066471	PREDICTED: actin-related protein 3-like [Hyalella azteca]	10.2871	3	3	3	1	418	47.3	6.16	1.11	0.984	1.114	1.015	0.958	0.819	1.06933	0.930667	1.149	0.127105
1067063656	PREDICTED: proteasome subunit alpha type-6-like [Hyalella azteca]	9.7561	2	2	1	1	246	27.4	6.14	0.947	0.743	0.923	0.893	1.25	1.244	0.871	1.129	0.771479	0.127383
1562015033	Actin-like protein 6A [Armadillidium vulgare]	1.93705	1	1	1	1	413	45.9	5.52	1.034	0.976	1.12	0.928	0.954	0.988	1.04333	0.956667	1.09059	0.12824
1562015735	60S ribosomal protein L10a [Armadillidium vulgare]	6.48148	1	1	1	1	216	24.7	9.77	1.028	1.247	1.371	1.171	0.691	0.491	1.21533	0.784333	1.54951	0.128317
1562031951	Alanine aminotransferase 2-like, partial [Armadillidium vulgare]	8.92388	2	3	2	1	381	42	6.25	0.972	0.866	1.015	1.083	0.998	1.066	0.951	1.049	0.906578	0.128857
1562012579	Eukaryotic translation initiation factor 3 subunit L [Armadillidium vulgare]	5.37428	3	4	3	1	521	61.6	6.39	0.969	0.929	1.014	0.992	1.05	1.047	0.970667	1.02967	0.9427	0.129343
1067074440	PREDICTED: potassium channel subfamily K member 10-like [Hyalella azteca]	1.92644	1	2	1	1	571	65.1	6.46	1.018	0.947	0.938	1.053	0.987	1.057	0.967667	1.03233	0.937359	0.129849
1562030143	Cartilage oligomeric matrix protein [Armadillidium vulgare]	4.34153	2	7	2	1	691	76.4	4.3	1.01	1.029	0.993	0.98	0.991	0.996	1.01067	0.989	1.02191	0.130682
1562011962	Cuticle protein [Armadillidium vulgare]	3.26409	1	1	1	1	337	36.2	6.25	0.761	0.837	0.827	0.965	1.593	1.017	0.808333	1.19167	0.678322	0.131486
1562028934	hypothetical protein Avbf_02960 [Armadillidium vulgare]	5.91398	1	1	1	1	186	21.2	4.97	1.06	1.013	1.044	0.917	0.927	1.039	1.039	0.961	1.08117	0.133138
1067077531	PREDICTED: myosin heavy chain, muscle-like isoform X1 [Hyalella azteca]	18.6178	41	209	39	1	1939	221.1	6.13	0.978	1.191	1.021	0.969	0.905	0.935	1.06333	0.936333	1.13564	0.133507
1562015852	CAAX prenyl protease 1-like protein [Armadillidium vulgare]	1.71306	1	1	1	1	467	54.1	8.37	1.077	0.986	1.015	0.963	0.969	0.989	1.026	0.973667	1.05375	0.134628
1371963746	CAAX prenyl protease 1 homolog [Hirondellea gigas]	2.13675	1	1	1	1	468	53	7.21	1.048	0.974	1.071	0.946	0.999	0.962	1.031	0.969	1.06398	0.135283
1371970007	electron transfer flavoprotein subunit alpha, mitochondrial-like, partial [Hirondellea gigas]	7.00809	2	3	2	1	371	39	8.37	1.045	0.888	0.834	0.973	1.155	1.105	0.922333	1.07767	0.855861	0.135927
1562032298	Glucose-6-phosphate isomerase [Armadillidium vulgare]	9.75057	3	4	3	1	441	49	7.31	0.964	1.141	1.246	1.057	0.862	0.73	1.117	0.883	1.26501	0.136073
1561989174	40S ribosomal protein SA [Armadillidium vulgare]	3.53357	1	1	1	1	283	31	5.35	0.903	0.833	1.022	1.155	0.947	1.14	0.919333	1.08067	0.850709	0.136505
1067083575	PREDICTED: protein ELYS-like [Hyalella azteca]	0.400641	1	1	1	1	2496	273.5	5.5	1.089	1.039	0.978	0.987	0.983	0.924	1.03533	0.964667	1.07326	0.136546
1562027181	Tripeptidyl-peptidase 2 [Armadillidium vulgare]	4.60251	1	2	1	1	239	26.8	6.57	1.141	1.065	0.99	0.846	1.036	0.922	1.06533	0.934667	1.1398	0.136798
1371969655	serine/threonine-protein phosphatase alpha-2 isoform [Hirondellea gigas]	15.5015	5	5	4	1	329	37.5	6.76	1.067	0.965	1.091	0.972	0.989	0.916	1.041	0.959	1.08551	0.139019
1562023178	Hrp65 protein [Armadillidium vulgare]	1.89983	1	1	1	1	579	66.2	7.14	1.097	0.96	1.127	1.014	0.935	0.867	1.06133	0.938667	1.13068	0.139658
1067067080	PREDICTED: ATP-dependent RNA helicase dbp2-like [Hyalella azteca]	2.62697	2	2	0	1	571	61.3	9.54	1.06	0.979	1.063	0.949	1.015	0.934	1.034	0.966	1.07039	0.140711
1561993662	Heat shock 70 kDa protein cognate 4 [Armadillidium vulgare]	18.5583	10	21	4	1	652	71.1	5.33	1.006	0.916	0.967	0.976	1.055	1.081	0.963	1.03733	0.928342	0.143571
1561998661	Eukaryotic translation initiation factor 3 subunit I [Armadillidium vulgare]	3.56083	1	1	1	1	337	37.6	6.39	0.902	0.911	0.86	0.871	1.238	1.218	0.891	1.109	0.803427	0.143866
1371970118	protein disulfide isomerase 2 [Hirondellea gigas]	10.6383	2	5	1	1	188	21.6	4.5	0.837	0.897	0.921	1.352	1.066	0.927	0.885	1.115	0.793722	0.145761
1371962392	sarcalumenin-like, partial [Hirondellea gigas]	1.9685	1	1	1	1	508	57.1	6.05	1.108	0.993	1.017	0.908	0.989	0.986	1.03933	0.961	1.08151	0.149132
1561992840	Beta-ureidopropionase [Armadillidium vulgare]	3.7422	1	1	1	1	481	54.8	7.71	0.915	0.878	0.825	0.862	1.18	1.34	0.872667	1.12733	0.774098	0.149279
1562016435	Twitchin [Armadillidium vulgare]	6.29934	30	52	25	1	6080	677.3	6.21	1.081	0.974	1.04	0.933	0.984	0.987	1.03167	0.968	1.06577	0.149576
1562007143	28S ribosomal protein S18a, mitochondrial [Armadillidium vulgare]	10.0671	1	1	1	1	149	16.8	9.96	1.031	0.772	0.983	1.064	1.061	1.088	0.928667	1.071	0.867102	0.149857
1562036615	Bleomycin hydrolase [Armadillidium vulgare]	4.7619	1	1	1	1	231	26.7	5.49	1.003	1.117	1.224	0.897	1.074	0.684	1.11467	0.885	1.25951	0.150938
1562033183	Prefoldin subunit 3 [Armadillidium vulgare]	12.5	1	1	1	1	104	12	7.88	1.005	0.416	0.709	0.738	1.484	1.648	0.71	1.29	0.550388	0.151368
1562033285	Histidine triad nucleotide-binding protein 1 [Armadillidium vulgare]	4.16667	1	1	1	1	168	18.8	7.94	1.022	0.901	0.982	1.023	1.031	1.041	0.968333	1.03167	0.938611	0.153093
1562016616	F-actin-capping protein subunit beta [Armadillidium vulgare]	6.47482	2	2	2	1	278	31.3	6.18	1.016	0.851	0.962	1.01	1.143	1.018	0.943	1.057	0.892148	0.153885
1371969944	26S proteasome non-ATPase regulatory subunit 3, partial [Hirondellea gigas]	3.5225	2	2	2	1	511	58.6	8.34	1.094	0.977	1.037	0.934	1.01	0.948	1.036	0.964	1.07469	0.154417
1561984147	60S ribosomal protein L8 [Armadillidium vulgare]	7.00389	2	2	2	1	257	28	10.78	1.042	1.103	1.091	0.872	0.8	1.092	1.07867	0.921333	1.17077	0.154605
1067103602	PREDICTED: 60S ribosomal protein L4-A-like [Hyalella azteca]	2.82258	1	1	1	1	496	56.1	11.18	0.899	0.881	1.009	1.013	1.209	0.989	0.929667	1.07033	0.868577	0.15488
1562035136	Phosphorylase b kinase regulatory subunit alpha, liver isoform [Armadillidium vulgare]	2.8169	1	1	1	1	213	24	7.52	0.9	0.976	1.009	1.037	1.09	0.987	0.961667	1.038	0.926461	0.156939
1067086491	PREDICTED: heterogeneous nuclear ribonucleoprotein Q-like isoform X1 [Hyalella azteca]	2.33918	2	2	1	1	855	94.4	6.76	1.15	1.036	1.059	1.092	0.817	0.846	1.08167	0.918333	1.17786	0.15702
1371968592	calcineurin subunit A [Hirondellea gigas]	5.09434	3	4	1	1	530	58.8	6.54	1.013	0.992	1.107	1.01	0.953	0.926	1.03733	0.963	1.07719	0.160152
1562033057	MOB kinase activator-like 1 [Armadillidium vulgare]	5.47945	1	1	1	1	219	25.2	6.86	1.155	0.922	1.145	0.859	0.918	1	1.074	0.925667	1.16024	0.160949
1371965228	Calcium/calmodulin-dependent protein kinase type II subunit beta, partial [Hirondellea gigas]	10.2094	3	3	3	1	382	42.9	7.09	1.081	0.998	1.058	1.045	0.885	0.932	1.04567	0.954	1.09609	0.162034
1562027802	NADH dehydrogenase [ubiquinone] 1 alpha subcomplex subunit 7 [Armadillidium vulgare]	9.40171	1	1	1	1	117	13	10.27	1.034	1.113	1.109	1.091	0.759	0.894	1.08533	0.914667	1.18659	0.162297
1561984504	Polyadenylate-binding protein 4 [Armadillidium vulgare]	3.0303	2	2	2	1	627	69.4	9.35	1.039	0.89	0.934	1.005	1.105	1.027	0.954333	1.04567	0.912655	0.163643
1562028641	Ubiquitin-conjugating enzyme E2 K [Armadillidium vulgare]	5.61224	1	2	1	1	196	22.2	6.21	0.956	0.921	1.025	0.992	1.033	1.074	0.967333	1.033	0.936431	0.164541
1562000866	Presequence protease, mitochondrial [Armadillidium vulgare]	0.998004	1	1	1	1	1002	113.3	6.3	0.977	0.562	0.743	0.742	1.39	1.586	0.760667	1.23933	0.613771	0.164738
1562003940	RNA-binding protein 14 [Armadillidium vulgare]	11.5578	2	2	2	1	199	22.4	9.67	1.103	0.98	1.02	0.966	0.932	0.998	1.03433	0.965333	1.07148	0.167109
1067068307	PREDICTED: tropomyosin isoform X24 [Hyalella azteca]	37.6761	14	64	0	1	284	32.5	4.78	0.808	1.117	0.811	1.061	1.073	1.13	0.912	1.088	0.838235	0.168027
1562030737	Tropomodulin-1, partial [Armadillidium vulgare]	4.28135	1	2	1	1	327	37	4.82	0.939	0.748	0.874	0.818	1.285	1.335	0.853667	1.146	0.74491	0.168085
1371968333	succinyl-CoA:3-ketoacid coenzyme A transferase 1, mitochondrial-like, partial [Hirondellea gigas]	3.25581	1	1	1	1	430	46.9	5.4	0.976	1.228	1.324	1.185	0.693	0.595	1.176	0.824333	1.42661	0.16928
1561981216	Peroxiredoxin 1 [Armadillidium vulgare]	6.26866	2	5	2	1	335	37.5	5.67	1.027	0.937	0.918	0.977	1.09	1.052	0.960667	1.03967	0.924014	0.169825
1561973732	Peroxiredoxin-4 [Armadillidium vulgare]	4.80769	1	1	1	1	208	23.5	9.73	0.977	0.869	1.023	1.056	0.993	1.082	0.956333	1.04367	0.916321	0.173062
1561969619	cytochrome P450 2L1, partial [Armadillidium vulgare]	2.83505	1	2	1	1	388	44.5	6.54	0.898	0.634	0.791	0.709	1.41	1.557	0.774333	1.22533	0.631937	0.173421
1067092168	PREDICTED: vinculin-like, partial [Hyalella azteca]	1.85676	1	1	1	1	377	41.7	5.48	1.031	0.909	0.967	1.052	1.005	1.036	0.969	1.031	0.939864	0.176641
1067094711	PREDICTED: transaldolase-like [Hyalella azteca]	2.04082	1	2	1	1	588	66.5	8.05	0.846	0.98	1.012	1.089	0.97	1.103	0.946	1.054	0.897533	0.177482
1371968834	60S ribosomal protein L3-like, partial [Hirondellea gigas]	2.52294	1	1	1	1	436	49.1	10.49	1.182	0.961	1.052	0.988	0.976	0.842	1.065	0.935333	1.13863	0.177728
1067066782	PREDICTED: protein l(2)37Cc-like [Hyalella azteca]	7.22022	2	3	2	1	277	30.5	8.09	0.99	0.947	0.964	0.963	1.039	1.096	0.967	1.03267	0.936411	0.18027
1562008331	hypothetical protein Avbf_17221 [Armadillidium vulgare]	6.47773	2	3	2	1	247	28.1	8.4	1.016	0.866	0.884	0.918	1.202	1.113	0.922	1.07767	0.855552	0.181218
1561997844	Transcription factor BTF3-like protein [Armadillidium vulgare]	11.0345	1	1	1	1	145	15.9	6.34	1.074	0.656	0.86	0.905	1.201	1.303	0.863333	1.13633	0.759754	0.183025
1561975245	GTP-binding protein Rheb [Armadillidium vulgare]	5.52764	1	2	1	1	199	22.4	5.03	1.043	1.066	0.995	0.936	1.041	0.919	1.03467	0.965333	1.07182	0.186248
1562019243	Vesicle-fusing ATPase 1 [Armadillidium vulgare]	4.7486	2	3	1	1	716	80	7.15	1.035	0.992	1.041	0.986	1.014	0.933	1.02267	0.977667	1.04603	0.187308
1561987670	Transitional endoplasmic reticulum ATPase TER94 [Armadillidium vulgare]	18.6536	11	20	10	1	713	79.1	5.21	1.016	0.955	0.983	1.002	1.014	1.031	0.984667	1.01567	0.969478	0.187698
1067080884	PREDICTED: sodium/potassium-transporting ATPase subunit alpha-like isoform X1 [Hyalella azteca]	17.8336	11	24	1	1	757	83.7	5.67	0.933	0.949	1.015	0.969	1.09	1.043	0.965667	1.034	0.933914	0.189224
1561995270	Protein hu-li tai shao [Armadillidium vulgare]	5.14019	2	3	2	1	428	47.7	7.91	0.984	1.487	0.944	0.832	0.882	0.87	1.13833	0.861333	1.32159	0.189353
1067068120	PREDICTED: hemocyanin-like [Hyalella azteca]	1.62722	2	16	2	1	676	77.4	5.6	0.952	1.034	0.904	0.997	1.025	1.089	0.963333	1.037	0.928962	0.1899
1562026183	Bridging integrator 2 [Armadillidium vulgare]	1.77778	1	2	1	1	450	50.4	5.19	0.967	0.899	0.942	0.905	1.135	1.152	0.936	1.064	0.879699	0.19394
1067064583	PREDICTED: calcium uptake protein 1 homolog, mitochondrial-like [Hyalella azteca]	1.28205	1	1	1	1	702	79.4	5.22	0.927	0.93	0.976	1.1	0.919	1.147	0.944333	1.05533	0.89482	0.194455
1067076923	PREDICTED: cullin-1-like [Hyalella azteca]	1.00251	1	1	1	1	798	91.5	8.44	1.2	0.937	1.071	0.838	0.991	0.963	1.06933	0.930667	1.149	0.195477
1561980710	Long-chain-fatty-acid--CoA ligase 4 [Armadillidium vulgare]	5.32725	3	4	3	1	657	73.1	7.56	1.087	1.006	0.987	0.996	0.945	0.98	1.02667	0.973667	1.05443	0.19572
1067106694	PREDICTED: heat shock protein HSP 90-alpha-like [Hyalella azteca]	7.60563	5	6	1	1	710	81.7	5.07	0.983	0.923	1.012	1.019	0.989	1.073	0.972667	1.027	0.947095	0.204997
1269636305	NADH dehydrogenase subunit 3 (mitochondrion) [Tachaea chinensis]	10.3448	1	2	1	1	116	13.5	6.61	1.024	0.976	1.158	1.035	0.9	0.907	1.05267	0.947333	1.11119	0.206504
1371955943	actin, partial [Hirondellea gigas]	11.1111	2	3	1	1	261	29.3	5.08	0.999	0.691	0.763	0.75	1.297	1.501	0.817667	1.18267	0.691375	0.207094
1371965170	60S ribosomal protein L12-like [Hirondellea gigas]	9.09091	1	2	1	1	165	17.6	9.74	1.097	0.986	1.03	0.911	1.038	0.937	1.03767	0.962	1.07866	0.207792
1067066451	PREDICTED: actin-5, muscle-specific-like isoform X1 [Hyalella azteca]	35.9043	11	123	0	1	376	41.6	5.39	0.979	0.812	0.848	0.835	1.17	1.356	0.879667	1.12033	0.785183	0.208495
1562001644	hypothetical protein Avbf_07328 [Armadillidium vulgare]	3.92157	1	1	1	1	153	17.9	4.72	1.039	0.883	0.95	0.972	1.071	1.086	0.957333	1.043	0.917865	0.211303
1562026647	Sialin [Armadillidium vulgare]	1.91847	1	1	1	1	417	46.2	7.72	1.034	0.955	0.899	0.999	1.013	1.1	0.962667	1.03733	0.928021	0.211971
1371968657	heat shock cognate 71 kDa protein-like, partial [Hirondellea gigas]	6.37584	3	9	1	1	596	66.2	5.91	0.989	0.886	0.97	0.927	1.115	1.112	0.948333	1.05133	0.902029	0.213876
1562033767	26S proteasome non-ATPase regulatory subunit 8 [Armadillidium vulgare]	9.56175	2	2	2	1	251	28.6	5.19	0.858	1.021	0.918	0.927	1.074	1.203	0.932333	1.068	0.872971	0.217805
1562022580	hypothetical protein Avbf_12445 [Armadillidium vulgare]	5.61404	2	2	2	1	285	32.6	6.89	1.052	1.019	0.985	1	0.949	0.996	1.01867	0.981667	1.03769	0.218064
1067101020	PREDICTED: actin-5C [Hyalella azteca]	32.1809	10	98	0	1	376	41.9	5.48	0.959	1.139	1.023	0.979	0.924	0.975	1.04033	0.959333	1.08443	0.218716
1562034010	Calcium-binding mitochondrial carrier protein Aralar1, partial [Armadillidium vulgare]	1.60428	1	1	1	1	561	61.9	9.07	1.061	0.841	0.958	1.061	1.046	1.033	0.953333	1.04667	0.910828	0.218877
1067064376	PREDICTED: uncharacterized protein LOC108672887 [Hyalella azteca]	2.36842	1	7	1	1	380	41.5	6	1.016	0.951	0.926	0.954	1.07	1.082	0.964333	1.03533	0.931423	0.219683
1562036035	Trifunctional enzyme subunit alpha, mitochondrial [Armadillidium vulgare]	1.65062	1	1	1	1	727	79.7	9.1	1.062	0.969	1.079	0.906	1.033	0.951	1.03667	0.963333	1.07612	0.220151
1562032117	Selenide, water dikinase [Armadillidium vulgare]	3.13589	1	2	1	1	287	31.8	7.33	1.016	0.82	0.986	0.961	1.067	1.149	0.940667	1.059	0.888259	0.221128
1562034002	Long-chain fatty acid transport protein 4 [Armadillidium vulgare]	1.3245	1	1	1	1	604	66.9	7.74	0.923	0.969	0.996	0.947	1.107	1.058	0.962667	1.03733	0.928021	0.223683
1371968270	serine/threonine-protein phosphatase 2A catalytic subunit beta isoform [Hirondellea gigas]	17.4757	4	6	1	1	309	35.5	5.44	1.076	0.95	1.063	0.952	0.991	0.967	1.02967	0.97	1.06151	0.224712
1562007311	40S ribosomal protein S26 [Armadillidium vulgare]	6.38298	1	1	1	1	141	16.6	10.35	1.037	0.933	1.239	0.951	0.983	0.856	1.06967	0.93	1.15018	0.22564
1562034038	Ubiquitin-conjugating enzyme E2 N [Armadillidium vulgare]	19.5652	2	4	2	1	138	15.2	6.55	0.987	1.002	0.897	1.007	1.121	0.986	0.962	1.038	0.926782	0.226579
1561969018	Proteasome subunit alpha type-7 [Armadillidium vulgare]	16.8033	4	4	4	1	244	27.4	7.11	0.966	0.929	0.895	0.902	1.073	1.234	0.93	1.06967	0.86943	0.227325
1562007266	T-complex protein 1 subunit beta [Armadillidium vulgare]	14.2056	7	11	7	1	535	57.8	6.04	0.994	0.903	1.018	1.05	1.046	0.99	0.971667	1.02867	0.944588	0.227508
1371968151	26S proteasome non-ATPase regulatory subunit 12-like [Hirondellea gigas]	1.31827	1	2	1	1	531	60.2	7.5	1.157	1.04	0.953	0.956	1.013	0.881	1.05	0.95	1.10526	0.228424
1561991977	DNA-binding protein HEXBP [Armadillidium vulgare]	4.10959	1	1	1	1	219	24.2	8.07	1.104	0.906	1.246	0.918	1.034	0.792	1.08533	0.914667	1.18659	0.230728
1561972034	Heat shock 70 kDa protein cognate 4 [Armadillidium vulgare]	17.0279	7	16	2	1	646	70.9	5.35	0.995	1.111	1.404	1.236	0.717	0.538	1.17	0.830333	1.40907	0.233302
1067070319	PREDICTED: hydroxysteroid dehydrogenase-like protein 2 [Hyalella azteca]	1.66667	1	1	1	1	420	44.6	7.77	1.225	0.947	1.006	0.932	0.944	0.947	1.05933	0.941	1.12575	0.234863
1561995187	Arginine--tRNA ligase, cytoplasmic [Armadillidium vulgare]	1.20664	1	1	1	1	663	75.7	6.28	0.978	0.894	0.989	0.945	1.15	1.044	0.953667	1.04633	0.911437	0.235088
240114287	hemocyanin subunit 1, partial [Eurydice pulchra]	3.66032	3	57	3	1	683	78.2	5.87	0.928	1.061	0.896	0.993	1.067	1.056	0.961667	1.03867	0.925866	0.237826
1562026732	GPI mannosyltransferase 4 [Armadillidium vulgare]	9.38967	2	2	2	1	213	24.4	7.83	1.043	1.003	1.021	1.038	0.946	0.949	1.02233	0.977667	1.04569	0.239126
1067083399	PREDICTED: sex-lethal homolog [Hyalella azteca]	3.24484	1	2	1	1	339	37.1	9.06	1.005	0.916	1.003	0.981	1.05	1.044	0.974667	1.025	0.950894	0.242256
1562015506	Outer dense fiber protein 3 [Armadillidium vulgare]	4.00802	1	1	1	1	499	55.5	9.06	1.088	0.894	1.234	0.979	0.855	0.949	1.072	0.927667	1.15559	0.242431
1067082988	PREDICTED: V-type proton ATPase subunit D-like [Hyalella azteca]	4.01606	1	1	1	1	249	28	9.29	1.041	0.861	0.986	1.014	1.052	1.046	0.962667	1.03733	0.928021	0.242871
1562006863	hypothetical protein Avbf_10987 [Armadillidium vulgare]	1.25348	1	1	1	1	718	80.8	5.59	1.003	0.866	1.004	1.124	1.017	0.986	0.957667	1.04233	0.918772	0.244034
1562036780	Transketolase [Armadillidium vulgare]	1.43541	1	1	1	1	627	67.7	7.01	0.966	0.986	1.213	0.977	0.938	0.92	1.055	0.945	1.1164	0.245897
1067076907	PREDICTED: 97 kDa heat shock protein-like isoform X1 [Hyalella azteca]	1.68269	1	1	1	1	832	92.2	5.26	1.191	0.995	0.984	0.884	1.042	0.904	1.05667	0.943333	1.12014	0.246684
1371962274	UPF0047 protein YjbQ-like [Hirondellea gigas]	6.28571	1	1	1	1	175	19.6	8.79	0.826	0.926	1.06	0.94	1.098	1.15	0.937333	1.06267	0.882058	0.247501
1067070901	PREDICTED: beta-centractin-like isoform X1 [Hyalella azteca]	9.84043	2	2	2	1	376	42.2	7.03	0.97	1.018	0.878	0.966	1.025	1.144	0.955333	1.045	0.914195	0.249062
1562033711	Succinate--CoA ligase [ADP-forming] subunit beta, mitochondrial [Armadillidium vulgare]	4	2	2	2	1	450	48.6	5.34	1.034	0.914	0.966	0.98	1.059	1.047	0.971333	1.02867	0.944264	0.249184
1562029846	Coatomer subunit gamma, partial [Armadillidium vulgare]	2.87958	1	1	1	1	382	42.5	8.03	0.889	0.897	0.924	0.809	1.232	1.249	0.903333	1.09667	0.823708	0.251377
1067117136	PREDICTED: cell division control protein 42 homolog [Hyalella azteca]	5.85106	1	1	1	1	188	20.8	7.91	1.05	1.024	1.026	0.882	1.053	0.964	1.03333	0.966333	1.06933	0.251929
1067087059	PREDICTED: GTP-binding nuclear protein Ran [Hyalella azteca]	20.8333	4	6	4	1	216	24.7	7.11	1.124	0.927	1.096	0.946	1.022	0.886	1.049	0.951333	1.10266	0.252142
1067111958	PREDICTED: aspartate aminotransferase, mitochondrial-like [Hyalella azteca]	1.87793	1	1	1	1	426	46.5	9.04	1.121	0.91	1.109	0.948	0.98	0.932	1.04667	0.953333	1.0979	0.252496
1561982067	26S proteasome non-ATPase regulatory subunit 4 [Armadillidium vulgare]	7.43405	3	3	3	1	417	45.1	4.87	1.04	0.948	1.106	0.984	0.949	0.973	1.03133	0.968667	1.06469	0.253007
1562028411	Polypyrimidine tract-binding protein 1 [Armadillidium vulgare]	3.26679	2	3	2	1	551	60.1	9.48	1.081	0.935	1.095	0.959	0.927	1.003	1.037	0.963	1.07684	0.254735
1371969599	ATP synthase subunit beta, mitochondrial [Hirondellea gigas]	13.5755	5	13	1	1	523	56.1	5.27	1.098	0.883	0.815	0.983	1.045	1.176	0.932	1.068	0.872659	0.255325
1067090231	PREDICTED: enolase isoform X1 [Hyalella azteca]	16.9265	5	24	2	1	449	48.5	6.21	0.993	1.137	0.978	0.953	0.938	1.002	1.036	0.964333	1.07432	0.256948
1067094013	PREDICTED: T-complex protein 1 subunit alpha-like [Hyalella azteca]	5.59567	3	4	2	1	554	59.9	6.84	0.999	0.901	0.988	0.942	1.081	1.088	0.962667	1.037	0.928319	0.260446
1562033204	Phosphoenolpyruvate carboxykinase, cytosolic [GTP] [Armadillidium vulgare]	5.19878	2	2	1	1	654	73.5	7.11	0.899	1.059	0.878	0.935	1.09	1.14	0.945333	1.055	0.896051	0.262276
1561992816	NEDD8-activating enzyme E1 catalytic subunit [Armadillidium vulgare]	2.46305	1	1	1	1	406	45.7	5.82	0.959	0.934	0.892	0.872	1.096	1.247	0.928333	1.07167	0.866252	0.264983
1067070021	PREDICTED: V-type proton ATPase subunit d 1-like [Hyalella azteca]	2.80112	1	1	1	1	357	40.9	4.94	1.093	0.874	0.878	0.996	1.114	1.045	0.948333	1.05167	0.901743	0.266208
1067086120	PREDICTED: cytochrome P450 2L1-like isoform X1 [Hyalella azteca]	1.20724	1	1	1	1	497	57	6.99	0.972	0.929	1.019	1.083	1.026	0.971	0.973333	1.02667	0.948052	0.267948
1067059815	PREDICTED: dTDP-4-amino-4,6-dideoxy-D-glucose transaminase-like [Hyalella azteca]	2.06186	1	1	1	1	388	42.4	6.92	1.004	0.884	0.976	0.924	1.104	1.109	0.954667	1.04567	0.912974	0.268214
1562003112	Glucose-6-phosphate 1-epimerase [Armadillidium vulgare]	5.2381	1	1	1	1	210	24.5	6.54	1.076	0.985	1.051	0.862	1	1.027	1.03733	0.963	1.07719	0.268245
1269636301	cytochrome c oxidase subunit 2 (mitochondrion) [Tachaea chinensis]	7.11111	1	2	1	1	225	26	5.85	0.77	0.963	0.966	1.381	1.004	0.916	0.899667	1.10033	0.817631	0.269455
1562024024	Isocitrate dehydrogenase [NAD] subunit alpha, mitochondrial [Armadillidium vulgare]	11.25	2	2	2	1	160	17.3	4.6	0.974	1.106	1.26	1.196	0.777	0.687	1.11333	0.886667	1.25564	0.270179
1067065556	PREDICTED: muscle-specific protein 20-like [Hyalella azteca]	4.11765	1	1	1	1	170	19	7.43	0.928	1.255	1.405	1.341	0.627	0.443	1.196	0.803667	1.48818	0.271649
1067101640	PREDICTED: glycogen synthase kinase-3 beta-like isoform X1 [Hyalella azteca]	3.64807	1	1	1	1	466	52.8	6.15	1.16	0.902	1.137	1.061	0.858	0.882	1.06633	0.933667	1.14209	0.272647
1067111762	PREDICTED: pre-mRNA-processing factor 19-like [Hyalella azteca]	1.92308	1	1	1	1	520	55.8	6.89	0.995	0.948	1.014	1.038	1.003	1.003	0.985667	1.01467	0.971419	0.272727
1067089959	PREDICTED: LOW QUALITY PROTEIN: probable pyruvate dehydrogenase E1 component subunit alpha, mitochondrial [Hyalella azteca]	3.28228	2	2	2	1	457	50.9	7.68	1.067	0.956	1.042	0.964	0.991	0.979	1.02167	0.978	1.04465	0.274469
1067066277	PREDICTED: tubulin beta-1 chain [Hyalella azteca]	29.2683	9	29	4	1	451	50.7	4.97	0.982	1.037	1.092	1.061	0.921	0.907	1.037	0.963	1.07684	0.274766
1561995508	DNA-directed RNA polymerase II subunit RPB3 [Armadillidium vulgare]	4.42804	1	1	1	1	271	30.8	4.89	0.897	0.933	0.913	0.827	1.282	1.147	0.914333	1.08533	0.842445	0.274975
1371964477	peroxisomal membrane protein PMP34-like [Hirondellea gigas]	2.53968	1	1	1	1	315	34.4	9.72	0.914	1.055	0.914	1.118	1.014	0.985	0.961	1.039	0.924928	0.27655
1561992593	NADP-dependent malic enzyme, partial [Armadillidium vulgare]	10.8527	4	8	4	1	516	58.1	6.49	0.988	0.925	0.956	0.919	1.062	1.15	0.956333	1.04367	0.916321	0.278605
1371954239	vacuolar H+-ATPase, partial [Hirondellea gigas]	4.10959	1	1	1	1	219	24.9	6.57	0.976	1.255	1.326	1.364	0.612	0.467	1.18567	0.814333	1.456	0.280479
1561997026	Septin-2 [Armadillidium vulgare]	8.43672	2	2	2	1	403	46.7	7.36	0.998	0.894	1.029	1.005	1.031	1.043	0.973667	1.02633	0.948685	0.281439
1067064662	PREDICTED: NEDD8 [Hyalella azteca]	14.1026	1	1	1	1	78	8.8	7.25	1.004	1.003	0.962	1.017	1.022	0.992	0.989667	1.01033	0.979545	0.282582
1067071362	PREDICTED: paramyosin, long form-like isoform X1 [Hyalella azteca]	3.49345	3	7	1	1	916	106.5	6.02	1.084	0.954	1.055	0.909	0.992	1.007	1.031	0.969333	1.06362	0.283406
1371963118	sulfite oxidase-like [Hirondellea gigas]	1.14379	1	1	1	1	612	67.3	7.55	1.022	0.886	0.981	0.948	1.08	1.083	0.963	1.037	0.92864	0.285164
1561987009	Protein sel-1-like protein 1 [Armadillidium vulgare]	1.40351	1	1	1	1	570	63.7	5.99	0.967	0.997	0.965	0.953	1.04	1.078	0.976333	1.02367	0.953761	0.285391
1562012187	Fructose-bisphosphate aldolase [Armadillidium vulgare]	26.4798	5	19	4	1	321	34.8	7.71	0.951	1.195	1.001	1.006	0.907	0.94	1.049	0.951	1.10305	0.28727
1371967566	NADH-quinone oxidoreductase subunit B-like [Hirondellea gigas]	6.82927	1	1	1	1	205	22.9	9.51	1.079	0.831	0.754	0.801	1.266	1.27	0.888	1.11233	0.798322	0.289694
1562028562	Serine/threonine-protein phosphatase 2A catalytic subunit beta isoform [Armadillidium vulgare]	17.8322	4	6	1	1	286	32.8	5.4	1.129	0.936	1.038	0.968	0.947	0.982	1.03433	0.965667	1.07111	0.292273
1562003381	60S ribosomal protein L15 [Armadillidium vulgare]	4.24528	1	1	1	1	212	25.2	11.46	0.942	0.797	1.06	0.987	0.986	1.229	0.933	1.06733	0.874141	0.292778
1562001304	V-type proton ATPase catalytic subunit A [Armadillidium vulgare]	6.09952	3	4	1	1	623	69.5	5.53	1.039	0.698	1.023	1.161	1.143	0.936	0.92	1.08	0.851852	0.293703
1371958005	dynactin subunit 1-like, partial [Hirondellea gigas]	1.16279	1	2	1	1	602	67.1	4.89	1.035	1.008	1.045	0.887	0.972	1.052	1.02933	0.970333	1.0608	0.294114
1562013443	NEDD8-conjugating enzyme Ubc12 [Armadillidium vulgare]	4.94505	1	1	1	1	182	21	7.24	1.076	0.948	1.073	1.021	0.905	0.977	1.03233	0.967667	1.06683	0.297632
1371963748	transmembrane emp24 domain-containing protein 2-like, partial [Hirondellea gigas]	11.5854	2	3	2	1	164	18.2	4.87	0.96	0.908	0.994	0.934	1.02	1.184	0.954	1.046	0.912046	0.300745
1067100308	PREDICTED: 40S ribosomal protein S13-like [Hyalella azteca]	4.63576	1	1	1	1	151	17.5	10.51	1.051	1.03	0.995	0.958	0.916	1.05	1.02533	0.974667	1.05198	0.302116
1067066465	PREDICTED: actin, muscle-like [Hyalella azteca]	32.2222	10	101	0	1	360	40.1	5.72	0.952	1.48	0.903	0.837	0.865	0.964	1.11167	0.888667	1.25094	0.302718
1562008725	3-hydroxyacyl-CoA dehydrogenase type-2, partial [Armadillidium vulgare]	3.84615	1	2	1	1	260	28.2	6.77	1.027	0.853	0.997	0.955	1.103	1.066	0.959	1.04133	0.920935	0.303082
1067100489	PREDICTED: dystonin-like isoform X1 [Hyalella azteca]	0.823782	4	5	3	1	5584	636.7	5.97	1.07	0.957	1.053	0.99	1.012	0.918	1.02667	0.973333	1.05479	0.303422
1371965875	guanine nucleotide-binding protein G(o) subunit alpha 1 [Hirondellea gigas]	8.47458	3	4	3	1	354	40.3	5.43	1.057	0.985	1.027	0.919	0.979	1.033	1.023	0.977	1.04708	0.303427
1561984606	Phosphoglycerate kinase [Armadillidium vulgare]	23.822	8	24	8	1	382	40.9	6.57	1.045	0.939	0.865	0.923	1.075	1.153	0.949667	1.05033	0.904157	0.303698
1562029497	Ras-related protein Rab-7a [Armadillidium vulgare]	21.4634	3	4	3	1	205	23.1	5.71	1.006	0.925	0.977	0.943	1.099	1.049	0.969333	1.03033	0.940796	0.303711
1371956963	fumarate hydratase, mitochondrial, partial [Hirondellea gigas]	8.48329	2	2	1	1	389	41.8	6.39	1.105	0.982	1.012	0.907	1.047	0.949	1.033	0.967667	1.06752	0.305149
1067061712	PREDICTED: chromosome partition protein Smc-like isoform X1 [Hyalella azteca]	1.14007	1	1	1	1	614	70.9	5.25	0.912	1.137	1.442	1.302	0.602	0.605	1.16367	0.836333	1.39139	0.30568
1371968606	Calponin-3 [Hirondellea gigas]	5.71429	1	3	1	1	245	26.9	7.99	1.003	0.892	1.018	0.98	1.025	1.082	0.971	1.029	0.943635	0.306319
1067070891	PREDICTED: ryanodine receptor-like, partial [Hyalella azteca]	2	1	1	1	1	700	77.9	4.98	1.071	0.995	1.053	0.844	0.973	1.064	1.03967	0.960333	1.08261	0.307026
1371967060	eukaryotic translation initiation factor 3 subunit M [Hirondellea gigas]	2.07792	1	1	1	1	385	43.6	5.45	1.037	0.978	0.92	0.991	1.034	1.04	0.978333	1.02167	0.957586	0.308049
1561974487	Tubulin-specific chaperone A [Armadillidium vulgare]	15.4545	1	1	1	1	110	12.5	5.38	0.864	0.967	1.013	1.018	0.938	1.199	0.948	1.05167	0.901426	0.308286
1562036925	Protein E(sev)2B [Armadillidium vulgare]	19.6429	3	4	3	1	168	19.6	5.17	1.024	0.895	1.003	1.002	1.011	1.064	0.974	1.02567	0.949626	0.309215
1067076966	PREDICTED: 26S protease regulatory subunit 8 [Hyalella azteca]	10.3448	4	8	3	1	406	45.7	8.94	1.013	1.028	1.008	1.037	0.944	0.969	1.01633	0.983333	1.03356	0.310287
1561979270	Phosphate carrier protein, mitochondrial [Armadillidium vulgare]	5.9322	2	3	1	1	354	38.9	9.13	0.873	1.234	1.17	1.127	0.851	0.745	1.09233	0.907667	1.20345	0.31047
1562030300	Formin-1 [Armadillidium vulgare]	0.881612	1	1	1	1	794	87.2	5.47	1.054	1.004	1.037	0.882	0.959	1.064	1.03167	0.968333	1.0654	0.311743
1371966849	GMP reductase 2-like, partial [Hirondellea gigas]	5.80475	2	2	2	1	379	41.4	8.25	1.094	0.932	1.086	1.038	0.932	0.918	1.03733	0.962667	1.07756	0.314153
1562027757	Proteasome subunit beta type-6 [Armadillidium vulgare]	3.53535	1	1	1	1	198	21.8	5.47	1.076	1.049	0.962	1.042	0.951	0.922	1.029	0.971667	1.05901	0.314582
1561971933	putative aspartate aminotransferase, cytoplasmic, partial [Armadillidium vulgare]	10.3343	3	4	3	1	329	37.1	5.16	1.071	0.969	1.031	0.947	0.948	1.034	1.02367	0.976333	1.04848	0.316429
262305815	triosephosphate isomerase, partial [Armadillidium vulgare]	27.8912	4	12	4	1	147	16.1	5.99	1.028	0.998	1.105	1.085	0.937	0.847	1.04367	0.956333	1.09132	0.316482
1067074284	PREDICTED: spectrin beta chain-like [Hyalella azteca]	7.52599	16	21	3	1	2405	276.4	5.47	1.021	0.891	1.014	1.01	1.028	1.035	0.975333	1.02433	0.952164	0.316773
1562032701	26S proteasome non-ATPase regulatory subunit 6 [Armadillidium vulgare]	5.16432	1	1	1	1	213	24.8	5.29	1.01	0.976	1.077	0.952	0.964	1.022	1.021	0.979333	1.04255	0.319738
1562035087	Phosphoglycerate mutase 2, partial [Armadillidium vulgare]	12.1495	3	8	1	1	214	24.7	7.2	1.032	0.906	0.956	0.979	1.136	0.991	0.964667	1.03533	0.931745	0.320361
1067080361	PREDICTED: V-type proton ATPase 116 kDa subunit a-like isoform X1 [Hyalella azteca]	1.06007	1	1	1	1	849	97.2	6.13	1.044	0.975	1.042	0.939	1.033	0.967	1.02033	0.979667	1.04151	0.320892
1562005765	Catalase, partial [Armadillidium vulgare]	8.23045	2	2	2	1	243	27.2	7.46	1.127	1.029	0.939	0.971	0.943	0.991	1.03167	0.968333	1.0654	0.321619
1067064361	PREDICTED: glutamate dehydrogenase, mitochondrial-like [Hyalella azteca]	9.25553	4	5	1	1	497	55.5	7.36	1.096	0.922	1.113	0.995	1.012	0.863	1.04367	0.956667	1.09094	0.322167
1561995466	Hemolymph clottable protein [Armadillidium vulgare]	0.712106	1	2	1	1	983	110.8	7.3	1.01	0.837	0.969	0.884	1.089	1.21	0.938667	1.061	0.8847	0.322662
1562006792	Phosphoribosyl pyrophosphate synthase-associated protein 2 [Armadillidium vulgare]	3.62694	1	1	1	1	386	42.9	8.09	1.056	0.967	0.88	1.01	1.086	1.001	0.967667	1.03233	0.937359	0.32379
1562013437	Alpha-aminoadipic semialdehyde dehydrogenase [Armadillidium vulgare]	2.14477	1	1	1	1	373	40.3	5.47	0.943	0.967	0.979	0.956	0.988	1.166	0.963	1.03667	0.928939	0.328001
1562016010	Proteasome-associated protein ECM29-like protein [Armadillidium vulgare]	0.592034	1	1	1	1	1858	207.5	6.73	1.006	0.902	1.022	1.013	1.059	0.997	0.976667	1.023	0.954708	0.331426
19073351	myosin heavy chain, partial [Pentidotea resecata]	12.8492	2	2	1	1	179	19.7	8.38	1.042	0.903	0.956	0.954	1.038	1.107	0.967	1.033	0.936108	0.332926
1067080269	PREDICTED: hemocyanin-like [Hyalella azteca]	1.03858	1	6	1	1	674	76.8	5.73	0.742	1.993	0.951	1.081	0.64	0.593	1.22867	0.771333	1.59291	0.334306
1067094450	PREDICTED: vesicle-fusing ATPase 1-like isoform X1 [Hyalella azteca]	4.31849	2	3	0	1	741	82.5	6.52	0.916	1.043	0.98	1.022	1.01	1.029	0.979667	1.02033	0.960144	0.334348
1371969065	sorting nexin-12-like [Hirondellea gigas]	11.6564	2	2	2	1	163	18.9	8.9	1.007	0.975	1.073	0.959	1.016	0.969	1.01833	0.981333	1.0377	0.334925
1067073312	PREDICTED: elongation factor 1-delta-like [Hyalella azteca]	4.10448	1	1	1	1	268	29.7	4.79	1.18	0.937	1.01	0.991	0.981	0.901	1.04233	0.957667	1.08841	0.335548
1371967049	MAP kinase-activated protein kinase 2-like, partial [Hirondellea gigas]	2.22772	1	1	1	1	404	45.3	7.9	1.052	0.958	1.039	0.979	0.976	0.996	1.01633	0.983667	1.03321	0.338254
1371969248	protein mago nashi homolog [Hirondellea gigas]	17.6871	2	2	2	1	147	17.3	5.87	1.096	0.923	1.074	0.933	0.997	0.976	1.031	0.968667	1.06435	0.339625
1561969531	putative oxidoreductase GLYR1-like protein [Armadillidium vulgare]	6.54206	1	1	1	1	214	23.1	4.88	0.953	0.913	0.933	0.825	1.145	1.23	0.933	1.06667	0.874687	0.341167
1562031311	Isochorismatase domain-containing protein 1 [Armadillidium vulgare]	1.2844	1	1	1	1	545	63.4	4.39	0.969	0.996	0.964	0.99	0.972	1.11	0.976333	1.024	0.953451	0.343834
1067095334	PREDICTED: hydroxyacyl-coenzyme A dehydrogenase, mitochondrial-like [Hyalella azteca]	2	1	1	1	1	350	37.4	5.78	0.888	1.252	1.359	1.376	0.656	0.469	1.16633	0.833667	1.39904	0.345124
1067072908	PREDICTED: vinculin-like [Hyalella azteca]	12.8571	2	2	2	1	140	15.7	8.95	0.98	0.896	1.051	1.014	1.016	1.044	0.975667	1.02467	0.95218	0.345239
1562002716	Prolyl 4-hydroxylase subunit alpha-1 [Armadillidium vulgare]	2.10158	1	1	1	1	571	65.1	6.05	1.067	0.956	1.067	1.054	0.937	0.919	1.03	0.97	1.06186	0.345949
1562035925	Nuclear migration protein nudC [Armadillidium vulgare]	7.18954	1	2	1	1	153	17.8	7.18	1.004	0.96	0.903	0.893	1.087	1.153	0.955667	1.04433	0.915097	0.347258
1067108845	PREDICTED: alpha-actinin, sarcomeric-like isoform X1 [Hyalella azteca]	27.2222	21	43	9	1	900	103.6	5.38	1.041	0.968	1.036	1.007	0.994	0.954	1.015	0.985	1.03046	0.350948
1371960356	glyceraldehyde 3-phosphate dehydrogenase, partial [Hirondellea gigas]	1.70455	1	1	1	1	352	38.7	7.64	0.943	1.014	1.14	0.97	1.004	0.929	1.03233	0.967667	1.06683	0.352698
1561982600	Serine hydroxymethyltransferase, cytosolic [Armadillidium vulgare]	5.15021	2	2	2	1	466	51.6	7.15	0.886	1.012	0.913	1.268	1.046	0.875	0.937	1.063	0.881468	0.353116
1067074470	PREDICTED: isocitrate dehydrogenase [NADP], mitochondrial-like, partial [Hyalella azteca]	3.43348	1	2	1	1	233	25.6	7.74	1.126	0.964	1.109	1.041	1.058	0.702	1.06633	0.933667	1.14209	0.354565
1562028581	Cathepsin B [Armadillidium vulgare]	6.66667	1	1	1	1	300	33.6	5.66	1.032	0.857	0.924	1.125	0.852	1.21	0.937667	1.06233	0.882648	0.355447
1067111706	PREDICTED: malate dehydrogenase, cytoplasmic-like [Hyalella azteca]	7.57576	2	3	1	1	330	35.1	6.4	1.05	0.979	1.071	0.926	0.893	1.081	1.03333	0.966667	1.06897	0.35834
1561975724	6-phosphogluconate dehydrogenase, decarboxylating [Armadillidium vulgare]	7.64463	2	6	2	1	484	52.8	6.55	0.992	1.059	1	0.966	1.033	0.95	1.017	0.983	1.03459	0.361808
1562025103	Myophilin [Armadillidium vulgare]	20.7792	2	3	2	1	154	17.1	7.44	0.977	1.008	1.071	0.943	1.025	0.976	1.01867	0.981333	1.03804	0.364206
1562026573	Protein peanut, partial [Armadillidium vulgare]	5.42005	2	2	2	1	369	42.8	6.76	1.011	0.96	0.943	0.935	1.118	1.034	0.971333	1.029	0.943959	0.366614
1562000827	Eukaryotic translation initiation factor 3 subunit A [Armadillidium vulgare]	0.520059	1	1	1	1	1346	160.2	8.62	1.147	0.985	1.006	0.805	1.025	1.033	1.046	0.954333	1.09605	0.367804
1269636308	NADH dehydrogenase subunit 5 (mitochondrion) [Tachaea chinensis]	5.16014	2	3	2	1	562	63.2	9.25	0.938	0.958	0.985	0.891	1.079	1.148	0.960333	1.03933	0.92399	0.368393
1562011045	Xylose isomerase [Armadillidium vulgare]	4.25056	2	3	2	1	447	52	8.29	0.917	1.111	1.233	1.198	0.822	0.719	1.087	0.913	1.19058	0.369457
1562036360	Exportin-1 [Armadillidium vulgare]	1.64654	1	1	1	1	911	104.2	5.54	0.937	0.991	1.025	0.982	1.045	1.021	0.984333	1.016	0.968832	0.371894
526454100	phosphoenolpyruvate carboxykinase, partial [Ligia cinerascens]	14.433	2	2	1	1	194	21.4	6.1	1.021	0.881	0.952	0.894	1.051	1.202	0.951333	1.049	0.906895	0.373923
1562002670	Stearoyl-CoA desaturase 5, partial [Armadillidium vulgare]	3.66197	1	1	1	1	355	41.5	8.69	1.124	0.868	0.871	0.988	1.043	1.106	0.954333	1.04567	0.912655	0.374358
1561997227	Muscle LIM protein Mlp84B [Armadillidium vulgare]	9.70588	2	2	2	1	340	37.3	8.19	1.118	0.92	1.061	0.926	1.025	0.951	1.033	0.967333	1.06788	0.375603
1562029894	Methylcrotonoyl-CoA carboxylase beta chain, mitochondrial [Armadillidium vulgare]	1.9469	1	1	1	1	565	61.7	8.19	1.136	0.952	0.995	0.967	0.973	0.977	1.02767	0.972333	1.05691	0.376325
1562033108	T-complex protein 1 subunit alpha [Armadillidium vulgare]	12.5749	2	2	1	1	167	18.2	7.99	1.103	0.811	0.828	0.799	1.197	1.261	0.914	1.08567	0.841879	0.376584
1067075681	PREDICTED: histone H2A-like [Hyalella azteca]	14.7059	3	5	2	1	136	14.7	10.42	1.098	0.923	1.096	0.926	1.065	0.892	1.039	0.961	1.08117	0.376728
1371969515	alpha-aminoadipic semialdehyde dehydrogenase-like, partial [Hirondellea gigas]	4.44444	1	1	1	1	180	19.9	7.85	0.995	1.213	1.173	1.363	0.69	0.566	1.127	0.873	1.29095	0.378117
1561975837	actin [Armadillidium vulgare]	41.6107	5	64	1	1	149	16.5	5.96	0.94	1.031	0.935	0.926	1.112	1.055	0.968667	1.031	0.939541	0.380162
1562026849	hypothetical protein Avbf_09701 [Armadillidium vulgare]	3.08219	1	1	1	1	292	32	9.04	0.786	1.332	1.468	1.48	0.496	0.438	1.19533	0.804667	1.4855	0.380968
1067080808	PREDICTED: tubulin beta chain-like isoform X2 [Hyalella azteca]	16.1148	6	15	1	1	453	50.9	5.02	0.909	1.195	1.173	1.238	0.773	0.712	1.09233	0.907667	1.20345	0.385725
1561980860	Rab GDP dissociation inhibitor beta [Armadillidium vulgare]	13.8095	5	8	3	1	420	47.1	5.8	1.094	0.947	1.036	0.913	1.017	0.993	1.02567	0.974333	1.05269	0.38814
1067077739	PREDICTED: EH domain-containing protein 1-like isoform X1 [Hyalella azteca]	3.81818	2	2	1	1	550	62.4	6.62	1	0.975	1.075	1.01	0.987	0.954	1.01667	0.983667	1.03355	0.388725
1371968144	medium-chain specific acyl-CoA dehydrogenase, mitochondrial-like [Hirondellea gigas]	1.90476	1	1	1	1	420	45.9	6.99	1.041	0.995	0.883	0.979	1.018	1.084	0.973	1.027	0.94742	0.389805
1561996542	High mobility group protein DSP1 [Armadillidium vulgare]	7	2	2	2	1	200	23.8	8.6	1.051	0.823	0.966	1.06	0.896	1.205	0.946667	1.05367	0.89845	0.390888
1067066683	PREDICTED: 40S ribosomal protein S23 [Hyalella azteca]	15.3846	2	2	2	1	143	16.1	10.61	0.988	0.858	0.91	0.767	1.15	1.327	0.918667	1.08133	0.849568	0.391627
1562034726	Syntaxin-1A [Armadillidium vulgare]	2.50696	1	1	1	1	359	41.3	5.45	0.984	0.93	1.025	1.085	0.992	0.984	0.979667	1.02033	0.960144	0.392977
1562032041	putative ATP-dependent RNA helicase me31b [Armadillidium vulgare]	3.54167	2	2	2	1	480	54.7	7.91	1.22	0.933	1.037	0.747	0.961	1.101	1.06333	0.936333	1.13564	0.393023
1561972691	T-complex protein 1 subunit eta [Armadillidium vulgare]	13.2353	6	8	6	1	544	59.2	6.49	1.021	0.92	0.992	0.951	1.05	1.066	0.977667	1.02233	0.956309	0.394374
1371969147	pyruvate dehydrogenase E1 component subunit beta, mitochondrial-like [Hirondellea gigas]	4.49438	1	2	1	1	356	38.8	5.83	1.148	0.745	0.752	0.717	1.212	1.426	0.881667	1.11833	0.788376	0.395073
1067074943	PREDICTED: tubulin alpha-3 chain-like [Hyalella azteca]	34.4444	11	26	0	1	450	50	5.14	0.981	0.902	1.05	1.012	1.062	0.994	0.977667	1.02267	0.955997	0.395728
1562032667	Gamma-soluble NSF attachment protein [Armadillidium vulgare]	2.8481	1	1	1	1	316	35.1	5.62	0.8	1.093	0.949	1.193	0.95	1.014	0.947333	1.05233	0.900222	0.399847
1067066221	PREDICTED: LOW QUALITY PROTEIN: alpha-aminoadipic semialdehyde dehydrogenase-like [Hyalella azteca]	5.8	2	3	2	1	500	53.3	6.95	1.03	0.844	1.036	1.011	1.041	1.038	0.97	1.03	0.941748	0.399848
1371968870	60S ribosomal protein L35-like [Hirondellea gigas]	5.51181	1	1	1	1	127	14.8	11.68	1.004	0.951	0.99	0.971	0.996	1.087	0.981667	1.018	0.964309	0.400405
1371965117	alpha-aminoadipic semialdehyde synthase, mitochondrial [Hirondellea gigas]	0.849257	1	1	1	1	942	104.4	6.6	1.142	0.937	1.041	0.851	0.966	1.063	1.04	0.96	1.08333	0.40084
1562030202	1-phosphatidylinositol 4,5-bisphosphate phosphodiesterase delta-4 [Armadillidium vulgare]	1.0596	1	1	1	1	755	85.8	6.38	1.058	0.928	1.089	0.937	1.006	0.982	1.025	0.975	1.05128	0.401345
1562007267	putative small nuclear ribonucleoprotein Sm D2 [Armadillidium vulgare]	17.4603	2	2	2	1	126	14.3	9.8	1.065	0.951	1.043	0.944	1.024	0.973	1.01967	0.980333	1.04012	0.402261
1371963001	phosphatidylinositol 5-phosphate 4-kinase type-2 alpha, partial [Hirondellea gigas]	1.86916	1	1	1	1	428	48.8	6.04	0.887	1.076	0.883	0.92	1.012	1.221	0.948667	1.051	0.902632	0.402835
1562031126	putative adenosylhomocysteinase 3, partial [Armadillidium vulgare]	4.5584	2	2	2	1	351	38.8	5.57	1.06	0.918	0.962	1.036	1.007	1.017	0.98	1.02	0.960784	0.403127
1562004302	Eukaryotic translation initiation factor 3 subunit C [Armadillidium vulgare]	1.13379	1	1	1	1	882	103	5.83	0.897	0.997	1.003	0.904	1.087	1.112	0.965667	1.03433	0.933613	0.406146
1494245713	beta-actin, partial [Gammarus fossarum]	23.0769	2	2	1	1	78	8.8	4.81	1.071	0.96	1.054	0.919	0.92	1.074	1.02833	0.971	1.05905	0.407431
1561987233	Clathrin interactor 1, partial [Armadillidium vulgare]	0.859951	1	1	1	1	814	89.7	8.4	0.918	0.837	0.935	1.495	0.727	1.088	0.896667	1.10333	0.812689	0.408202
1067089155	PREDICTED: iron-sulfur cluster assembly scaffold protein IscU-like [Hyalella azteca]	4.8913	1	1	1	1	184	19.9	4.87	0.964	0.925	1.005	0.944	1.181	0.982	0.964667	1.03567	0.931445	0.408859
1067094088	PREDICTED: circumsporozoite protein-like [Hyalella azteca]	1.84049	1	2	1	1	326	36.5	7.59	1.023	1.048	1.051	0.949	0.811	1.117	1.04067	0.959	1.08516	0.410364
1067064703	PREDICTED: proteasome subunit alpha type-1-like [Hyalella azteca]	7.8853	2	3	2	1	279	30.9	5.14	1.035	1.066	0.948	0.984	0.993	0.974	1.01633	0.983667	1.03321	0.412458
1561991317	Hemocyte protein-glutamine gamma-glutamyltransferase, partial [Armadillidium vulgare]	3.125	1	1	1	1	256	29.5	8.09	1.257	0.81	1.144	1.077	0.886	0.826	1.07033	0.929667	1.15131	0.412862
1067099134	PREDICTED: eukaryotic translation initiation factor 3 subunit B-like [Hyalella azteca]	1.45138	1	1	1	1	689	80.3	6.77	0.987	1.109	1.034	1.125	0.92	0.826	1.04333	0.957	1.09021	0.415568
1371966395	titin-like, partial [Hirondellea gigas]	3.53749	6	15	1	1	1894	212.1	5.57	0.991	1.018	1.069	0.904	0.941	1.077	1.026	0.974	1.05339	0.41586
1562036420	Beta-arrestin-1 [Armadillidium vulgare]	8.22785	1	1	1	1	158	18.4	6.77	0.907	0.971	1.025	0.951	0.99	1.155	0.967667	1.032	0.937661	0.417438
1561971319	Tubulin alpha-1 chain [Armadillidium vulgare]	29.8077	9	18	1	1	416	46.3	5.17	0.968	1.179	1.265	1.436	0.665	0.486	1.13733	0.862333	1.3189	0.41755
1562011097	hypothetical protein Avbf_14183 [Armadillidium vulgare]	2.32843	2	3	1	1	816	91.2	7.94	1.035	0.942	0.964	0.954	1.069	1.036	0.980333	1.01967	0.961425	0.424089
1371969091	protein translation factor SUI1 homolog [Hirondellea gigas]	13.6364	1	1	1	1	110	12.3	6.77	0.939	1.031	1.109	0.992	1.019	0.911	1.02633	0.974	1.05373	0.42432
1371967925	cytosol aminopeptidase-like [Hirondellea gigas]	2.33463	1	1	1	1	514	54.1	7.24	0.977	1.065	0.869	1.011	1.098	0.98	0.970333	1.02967	0.942376	0.424494
1561982313	Nucleoplasmin-like protein [Armadillidium vulgare]	14.0127	1	1	1	1	157	17.5	4.31	0.721	1.193	0.864	0.921	1.236	1.065	0.926	1.074	0.862197	0.425
1562010125	Tensin-1, partial [Armadillidium vulgare]	1.08696	1	1	1	1	828	89.1	9.2	1.05	0.753	1.06	1.031	1.015	1.092	0.954333	1.046	0.912365	0.425437
1067068285	PREDICTED: tropomyosin isoform X13 [Hyalella azteca]	37.6761	13	79	1	1	284	32.8	4.73	0.729	1.319	0.672	1.01	1.095	1.175	0.906667	1.09333	0.829268	0.428787
1561988380	Succinate--CoA ligase subunit alpha, mitochondrial [Armadillidium vulgare]	3.1746	1	1	1	1	252	27.2	8.9	1.258	0.853	1.053	1.028	0.888	0.92	1.05467	0.945333	1.11566	0.428925
1371969855	Heat shock protein 70 KDa form 2, partial [Hirondellea gigas]	15.798	7	20	0	1	614	67.3	5.38	1.074	0.913	1.141	1.089	0.939	0.844	1.04267	0.957333	1.08914	0.434338
1562033019	ATP-binding cassette sub-family F member 2 [Armadillidium vulgare]	2.47934	1	1	1	1	484	54.3	7.91	1.069	0.928	1.079	1.031	0.914	0.978	1.02533	0.974333	1.05234	0.438527
1067069297	PREDICTED: uncharacterized protein LOC108683327 [Hyalella azteca]	3.19149	1	1	1	1	188	21	6.14	1.031	0.885	1.015	1.075	1.01	0.984	0.977	1.023	0.955034	0.438918
1562034565	60S ribosomal protein L23a [Armadillidium vulgare]	2.46305	1	3	1	1	406	41.5	11.11	1.05	0.823	0.914	0.772	1.178	1.262	0.929	1.07067	0.867684	0.439081
1067081744	PREDICTED: ras-like protein 2 [Hyalella azteca]	4.56853	1	1	1	1	197	21.9	8.79	1.05	0.932	1.085	0.93	0.988	1.014	1.02233	0.977333	1.04604	0.43986
1371969374	40S ribosomal protein S3-like [Hirondellea gigas]	14.0625	3	7	0	1	256	28.2	9.85	1.045	0.94	1.086	0.911	0.992	1.026	1.02367	0.976333	1.04848	0.439964
1067113530	PREDICTED: 14-3-3 protein epsilon-like [Hyalella azteca]	21.5517	3	4	1	1	116	13.2	4.88	0.937	1.043	1.161	1.13	0.888	0.84	1.047	0.952667	1.09902	0.44188
1561978585	Obg-like ATPase 1 [Armadillidium vulgare]	11.4504	4	4	4	1	393	44.1	7.2	0.936	1.079	1.065	1.002	0.887	1.03	1.02667	0.973	1.05516	0.443181
1067075833	PREDICTED: histone H2A.V [Hyalella azteca]	13.2812	2	5	1	1	128	13.4	10.58	1.074	0.939	1.043	0.959	1.011	0.975	1.01867	0.981667	1.03769	0.444142
1067095372	PREDICTED: 40S ribosomal protein S18 [Hyalella azteca]	7.23684	1	1	1	1	152	17.5	10.39	0.996	0.93	1.02	0.961	1.075	1.018	0.982	1.018	0.964637	0.444755
1067068933	PREDICTED: coatomer subunit beta'-like [Hyalella azteca]	2.11335	2	2	2	1	1041	114.3	5.2	0.871	0.984	1.012	0.868	1.069	1.196	0.955667	1.04433	0.915097	0.44501
1562000403	40S ribosomal protein S8, partial [Armadillidium vulgare]	6.19048	1	1	1	1	210	24.2	10.27	1.089	0.935	0.882	1.009	0.975	1.11	0.968667	1.03133	0.939237	0.445599
1562028227	Annexin B9 [Armadillidium vulgare]	1.94986	1	1	1	1	359	41.7	5.07	1.08	0.757	1.029	1.103	0.984	1.047	0.955333	1.04467	0.914486	0.446732
1371966091	ubiquitin-conjugating enzyme E2 L3-like [Hirondellea gigas]	11.6883	2	4	2	1	154	17.8	8.53	0.989	1.016	0.955	1.013	0.968	1.059	0.986667	1.01333	0.973684	0.446877
1561992547	Aspartate--tRNA ligase, cytoplasmic [Armadillidium vulgare]	2.80899	1	1	1	1	534	60.5	7.08	0.852	1.498	0.915	0.916	0.831	0.987	1.08833	0.911333	1.19422	0.447807
1562027329	Talin-1 [Armadillidium vulgare]	4.44655	5	7	4	1	1057	114.8	5.62	1.004	0.949	1.017	0.99	1.027	1.012	0.99	1.00967	0.980522	0.448804
1561992765	Solute carrier family 12 member 1 [Armadillidium vulgare]	10.6557	1	1	1	1	122	13.7	9.03	1.046	0.974	1.024	0.939	0.982	1.035	1.01467	0.985333	1.02977	0.44906
1067118091	PREDICTED: superoxide dismutase [Mn], mitochondrial-like [Hyalella azteca]	3.7931	1	1	1	1	290	31.7	6.25	1.028	0.692	1.109	1.028	1.15	0.992	0.943	1.05667	0.892429	0.451275
1561986268	Protein Mo25 [Armadillidium vulgare]	2.50696	1	1	1	1	359	42.3	8.48	1.029	0.928	0.986	1	1.089	0.969	0.981	1.01933	0.962394	0.454838
1561979569	Methylmalonic aciduria type A protein, mitochondrial [Armadillidium vulgare]	2.03488	1	1	1	1	344	37.8	9.01	1.032	0.957	0.959	0.987	1.084	0.98	0.982667	1.017	0.966241	0.456115
1067075005	PREDICTED: protein arginine N-methyltransferase 1-like [Hyalella azteca]	2.84238	1	1	1	1	387	44.3	7.83	1.021	1.021	0.873	0.999	1.124	0.963	0.971667	1.02867	0.944588	0.457485
1067077641	PREDICTED: signal peptidase complex catalytic subunit SEC11A-like [Hyalella azteca]	3.74332	1	1	1	1	187	21	8.38	0.885	0.922	1.054	1.104	1.185	0.85	0.953667	1.04633	0.911437	0.458973
1561988619	Band 4.1-like protein 1 [Armadillidium vulgare]	3.55515	3	3	3	1	1097	119.4	7.34	1.086	0.87	0.901	0.863	1.096	1.185	0.952333	1.048	0.908715	0.46058
1067080806	PREDICTED: tubulin beta chain-like isoform X1 [Hyalella azteca]	16.1148	6	17	0	1	453	50.8	4.97	1.012	0.961	0.982	0.949	1.036	1.06	0.985	1.015	0.970443	0.460974
1562010663	Short-chain specific acyl-CoA dehydrogenase, mitochondrial [Armadillidium vulgare]	1.55317	1	1	1	1	837	90.7	8.21	0.831	1.114	0.93	1.087	0.922	1.116	0.958333	1.04167	0.92	0.462202
1561990713	Proclotting enzyme, partial [Armadillidium vulgare]	3.87097	1	1	1	1	310	35.2	6.04	1.107	0.959	1.011	0.98	0.893	1.051	1.02567	0.974667	1.05233	0.463491
1067100573	PREDICTED: uncharacterized protein LOC108669542 isoform X1 [Hyalella azteca]	0.924974	3	3	3	1	3892	441.8	4.91	1.131	0.969	0.98	0.892	1.021	1.007	1.02667	0.973333	1.05479	0.466518
1561992267	Serine/arginine-rich splicing factor 1 [Armadillidium vulgare]	3.7037	1	2	1	1	243	27.2	9.92	0.794	1.074	1.01	0.978	0.991	1.153	0.959333	1.04067	0.921845	0.468683
1371966367	myosin heavy chain, muscle-like 8, partial [Hirondellea gigas]	12.7119	2	2	1	1	118	13.6	8.73	1.004	0.991	0.886	0.86	1.087	1.173	0.960333	1.04	0.923397	0.472551
1562029019	Arginine kinase [Armadillidium vulgare]	23.1844	8	59	4	1	358	40.3	6.32	0.948	1.147	0.98	1.001	0.945	0.978	1.025	0.974667	1.05164	0.474287
1561976837	Alpha-L-fucosidase [Armadillidium vulgare]	1.73267	1	1	1	1	404	47.2	6.2	1.055	0.981	1.014	0.939	1.055	0.957	1.01667	0.983667	1.03355	0.475173
1562032778	DnaJ protein-like 1 [Armadillidium vulgare]	2.84091	1	1	1	1	352	39	9.11	1.073	0.95	1.029	0.98	0.94	1.028	1.01733	0.982667	1.03528	0.475458
1067105220	PREDICTED: ubiquitin-fold modifier 1 [Hyalella azteca]	7.95455	1	1	1	1	88	9.5	9.6	1.059	0.989	0.994	0.933	0.995	1.029	1.014	0.985667	1.02875	0.475608
1561972609	GMP synthase [glutamine-hydrolyzing] [Armadillidium vulgare]	2.08333	1	1	1	1	624	69.9	6.37	1.097	0.839	0.958	1.121	0.945	1.04	0.964667	1.03533	0.931745	0.477379
1561984825	cytochrome c [Armadillidium vulgare]	22.1154	2	2	2	1	104	11.4	9.58	1.059	0.928	1.104	1.01	1.042	0.857	1.03033	0.969667	1.06256	0.478837
1562027790	Eukaryotic translation initiation factor 5A [Armadillidium vulgare]	38.5827	5	9	5	1	127	14	5.54	0.972	1.05	1.072	1.114	0.926	0.866	1.03133	0.968667	1.06469	0.480426
1067094096	PREDICTED: elongation factor Tu, mitochondrial-like [Hyalella azteca]	3.41151	2	2	2	1	469	51.9	8.15	1.063	0.974	1.01	1.018	1.013	0.921	1.01567	0.984	1.03218	0.480729
1561979035	Histone H4 [Armadillidium vulgare]	50.4854	5	14	3	1	103	11.4	11.36	1.144	0.945	1.017	0.826	1.028	1.041	1.03533	0.965	1.07288	0.481415
1067099544	PREDICTED: long-chain-fatty-acid--CoA ligase 5-like [Hyalella azteca]	1.22494	1	1	1	1	898	100.3	8.79	1.175	0.908	1.012	0.931	0.952	1.021	1.03167	0.968	1.06577	0.482444
1371969105	V-type proton ATPase subunit F-like [Hirondellea gigas]	6.50407	1	1	1	1	123	13.7	5.16	0.986	0.983	0.965	0.917	1.112	1.037	0.978	1.022	0.956947	0.484422
1561995384	26S protease regulatory subunit 7 [Armadillidium vulgare]	15.7407	6	11	1	1	432	48.3	6.07	1.032	0.951	0.974	0.99	0.982	1.071	0.985667	1.01433	0.971738	0.484674
1562006288	S-adenosylmethionine synthase isoform type-1 [Armadillidium vulgare]	2.82486	1	1	1	1	354	39.5	8.65	0.954	1.061	1.081	0.86	1.109	0.935	1.032	0.968	1.06612	0.486747
1067066461	PREDICTED: actin-5, muscle-specific-like isoform X4 [Hyalella azteca]	31.5508	9	112	0	1	374	41.4	5.3	0.992	0.919	0.849	0.673	1.227	1.34	0.92	1.08	0.851852	0.488937
1562033069	Beta-parvin [Armadillidium vulgare]	5.70866	2	3	2	1	508	57.8	5.94	1.074	0.91	1.122	0.864	0.936	1.094	1.03533	0.964667	1.07326	0.491622
1067117784	PREDICTED: ras-related protein Rab-2-like [Hyalella azteca]	18.0617	3	5	1	1	227	25.3	7.15	1.012	0.962	1.005	1.025	0.996	0.999	0.993	1.00667	0.986424	0.493159
1067074744	PREDICTED: spectrin alpha chain-like isoform X1 [Hyalella azteca]	11.936	28	43	1	1	2438	280.2	5.17	0.871	1.171	1.096	1.114	0.912	0.837	1.046	0.954333	1.09605	0.49535
1561969809	Myelin P2 protein [Armadillidium vulgare]	9.55882	1	3	1	1	136	15.5	5.47	1.042	0.855	1.023	0.965	1.102	1.014	0.973333	1.027	0.947744	0.495627
1562032382	26S proteasome non-ATPase regulatory subunit 11 [Armadillidium vulgare]	9.85577	4	5	4	1	416	46.3	6.57	1.021	0.932	0.998	0.946	1.053	1.051	0.983667	1.01667	0.967541	0.497473
1562035278	Lamin Dm0 [Armadillidium vulgare]	6.49351	3	3	3	1	385	45.1	5.57	0.997	0.994	1.086	1.099	0.907	0.917	1.02567	0.974333	1.05269	0.500063
1562026597	NAD-dependent alcohol dehydrogenase [Armadillidium vulgare]	4.18719	1	2	1	1	406	44.3	5.62	0.957	1.304	0.898	0.945	0.834	1.063	1.053	0.947333	1.11154	0.500596
1562025101	Myosin heavy chain, muscle [Armadillidium vulgare]	4.25139	2	3	0	1	541	62.8	5.52	0.883	1.068	0.782	0.651	1.211	1.406	0.911	1.08933	0.836291	0.500859
1562031784	Peroxidasin [Armadillidium vulgare]	1.89076	1	1	1	1	476	52.4	4.79	0.814	1.045	0.997	1.269	0.927	0.949	0.952	1.04833	0.908108	0.502972
1371961637	AP-1 complex subunit mu-1-like [Hirondellea gigas]	1.89573	1	1	1	1	422	48.2	6.67	1.067	0.958	1.023	0.937	1.04	0.975	1.016	0.984	1.03252	0.504284
1067113355	PREDICTED: isovaleryl-CoA dehydrogenase, mitochondrial-like [Hyalella azteca]	2.85036	1	1	1	1	421	46.1	6.92	1.055	0.963	0.933	1.012	1.065	0.973	0.983667	1.01667	0.967541	0.507244
1067067451	PREDICTED: dual oxidase 2-like [Hyalella azteca]	0.669915	1	1	1	1	1642	186.5	9.11	0.953	0.989	1.01	0.934	1.048	1.067	0.984	1.01633	0.968186	0.509874
1067089283	PREDICTED: eukaryotic peptide chain release factor subunit 1 isoform X1 [Hyalella azteca]	2.49433	1	2	1	1	441	49.5	5.82	1.059	0.957	0.928	0.972	1.001	1.083	0.981333	1.01867	0.963351	0.510927
1067081849	PREDICTED: tubulin beta chain [Hyalella azteca]	13.0631	5	21	1	1	444	49.9	4.97	1.076	0.908	1.108	1.075	0.961	0.873	1.03067	0.969667	1.06291	0.513784
1067060702	PREDICTED: L-lactate dehydrogenase-like isoform X1 [Hyalella azteca]	2.7027	1	1	1	1	333	35.7	6.61	1.044	1	1	1.039	1.006	0.911	1.01467	0.985333	1.02977	0.514607
1562030732	Acetyl-CoA acetyltransferase, cytosolic [Armadillidium vulgare]	2.51889	1	1	1	1	397	41.7	6.98	0.984	0.929	1.012	1.127	0.901	1.048	0.975	1.02533	0.95091	0.51506
1371969005	40S ribosomal protein S16-like [Hirondellea gigas]	13.6986	2	2	1	1	146	16.5	10.67	0.972	0.937	1.031	1.001	0.946	1.113	0.98	1.02	0.960784	0.516448
1561998274	putative medium-chain specific acyl-CoA dehydrogenase, mitochondrial [Armadillidium vulgare]	2.77778	1	2	1	1	324	35.9	8.44	1.047	0.803	1.06	1.063	1.028	1	0.97	1.03033	0.941443	0.519552
1562035302	Protein SEC13-like protein [Armadillidium vulgare]	3.92157	1	1	1	1	306	34.5	7.31	1.028	0.852	1.005	0.851	1.137	1.127	0.961667	1.03833	0.926164	0.519807
1067064966	PREDICTED: myelin P2 protein-like [Hyalella azteca]	6.52174	1	1	1	1	138	15.4	5.4	0.862	1.081	1.257	1.24	0.809	0.751	1.06667	0.933333	1.14286	0.525527
1067069078	PREDICTED: peroxiredoxin-2-like [Hyalella azteca]	3.25203	1	1	1	1	246	27.3	5.31	1.014	0.909	1.026	1.041	1.057	0.953	0.983	1.017	0.966568	0.528001
1561978211	Vacuolar protein sorting-associated protein 29 [Armadillidium vulgare]	10.1604	2	2	2	1	187	20.9	6.71	1.076	0.939	1.04	0.922	1.039	0.984	1.01833	0.981667	1.03735	0.528118
1561989209	Dynein heavy chain, cytoplasmic [Armadillidium vulgare]	0.323062	1	1	1	1	4024	461.5	6.34	0.868	0.928	1.021	0.874	0.906	1.403	0.939	1.061	0.885014	0.528421
1067074750	PREDICTED: flotillin-1-like isoform X1 [Hyalella azteca]	1.84758	1	2	1	1	433	48	6.3	1.052	0.87	0.993	0.915	1.036	1.135	0.971667	1.02867	0.944588	0.530884
1561977620	T-complex protein 1 subunit theta [Armadillidium vulgare]	6.33245	2	6	2	1	379	41.2	5.57	1.008	0.976	1.059	1.052	0.936	0.969	1.01433	0.985667	1.02908	0.533571
1561973975	Cleavage stimulation factor subunit 1 [Armadillidium vulgare]	7.14286	1	1	1	1	280	31.2	6.23	0.902	0.915	1.077	0.87	1.166	1.069	0.964667	1.035	0.932045	0.534927
1562029832	Sarcalumenin [Armadillidium vulgare]	8.80282	2	2	2	1	284	32.4	9.04	1.104	0.849	0.951	0.924	1.042	1.131	0.968	1.03233	0.937682	0.536711
1067070792	PREDICTED: ATP synthase subunit alpha, mitochondrial-like [Hyalella azteca]	16.426	8	23	2	1	554	59.8	9.09	1.06	0.942	1.039	0.952	1.014	0.993	1.01367	0.986333	1.02771	0.538145
1562033104	40S ribosomal protein S15a [Armadillidium vulgare]	10.7692	1	2	1	1	130	14.5	9.8	1.07	0.809	0.8	0.574	1.11	1.637	0.893	1.107	0.806685	0.539527
1067071824	PREDICTED: fumarylacetoacetase-like isoform X2 [Hyalella azteca]	5.01193	2	2	2	1	419	46	6.46	1.186	0.978	0.938	0.834	1.014	1.05	1.034	0.966	1.07039	0.540902
1067068289	PREDICTED: tropomyosin isoform X15 [Hyalella azteca]	40.1408	14	73	0	1	284	32.8	4.74	0.825	1.148	0.884	1.254	0.95	0.939	0.952333	1.04767	0.909004	0.542087
1067071406	PREDICTED: 14-3-3 protein zeta isoform X1 [Hyalella azteca]	31.7073	7	19	0	1	246	28	4.77	0.89	1.077	0.962	1.115	0.984	0.972	0.976333	1.02367	0.953761	0.542302
1067071975	PREDICTED: elongation factor 1-gamma-like [Hyalella azteca]	1.65094	1	1	1	1	424	48.2	7.3	1.051	0.881	1.149	0.981	1.003	0.936	1.027	0.973333	1.05514	0.542588
1067107045	PREDICTED: DNA-directed RNA polymerase II subunit RPB11-like [Hyalella azteca]	6.77966	1	2	1	1	118	13.6	6.07	1.033	0.972	1.043	0.98	1.06	0.913	1.016	0.984333	1.03217	0.544965
1371970258	THO complex subunit 4-like [Hirondellea gigas]	5.31561	1	2	1	1	301	31.4	11.96	1.063	0.946	1.028	0.976	0.975	1.013	1.01233	0.988	1.02463	0.545201
1067081412	PREDICTED: ras-related protein Rap-1b [Hyalella azteca]	13.9785	3	6	2	1	186	21	6.71	1.003	0.882	1.017	0.854	1.11	1.135	0.967333	1.033	0.936431	0.545319
1561969978	Fructose-bisphosphate aldolase [Armadillidium vulgare]	3.85675	1	7	1	1	363	39.3	7.93	0.956	1.068	1.112	1.211	0.87	0.783	1.04533	0.954667	1.09497	0.54875
1371966507	Neuronal calcium sensor 2 [Hirondellea gigas]	21.2766	3	7	3	1	188	21.5	4.75	0.924	1.08	1.111	1.166	0.877	0.842	1.03833	0.961667	1.07972	0.550812
1561988924	Dihydrolipoyl dehydrogenase, mitochondrial [Armadillidium vulgare]	5.31496	2	3	2	1	508	53.9	6.93	1.054	0.933	1.061	1.028	0.988	0.936	1.016	0.984	1.03252	0.552071
1562009649	40S ribosomal protein S4 [Armadillidium vulgare]	4.52675	1	1	1	1	243	27.4	9.99	1.224	0.868	1.03	0.906	0.872	1.101	1.04067	0.959667	1.0844	0.552967
1561969787	60S ribosomal protein L5 [Armadillidium vulgare]	5.20231	1	1	1	1	173	19.6	8.06	1.058	1.13	0.936	0.761	0.955	1.16	1.04133	0.958667	1.08623	0.554626
1241822713	mitochondrial citrate synthase [Eulimnogammarus verrucosus]	3.38983	1	2	1	1	472	52.1	6.79	1.027	0.817	1.019	0.81	1.093	1.234	0.954333	1.04567	0.912655	0.55603
1561972411	Unc-related protein [Armadillidium vulgare]	2.09677	1	1	1	1	620	70.7	6.92	0.993	0.914	1.192	0.847	1.019	1.036	1.033	0.967333	1.06788	0.556218
1371955857	40S ribosomal protein S27 [Hirondellea gigas]	13.0952	1	1	1	1	84	9.2	9.36	0.777	1.076	1.038	1.036	0.923	1.15	0.963667	1.03633	0.929881	0.560364
1562031755	Serine proteinase stubble [Armadillidium vulgare]	3.94737	1	1	1	1	456	50	5.53	0.796	0.876	1.201	1.122	1.062	0.943	0.957667	1.04233	0.918772	0.563322
1562027097	UTP--glucose-1-phosphate uridylyltransferase [Armadillidium vulgare]	5.63798	2	5	1	1	337	38.1	7.93	1.092	0.98	0.982	1.022	0.896	1.029	1.018	0.982333	1.03631	0.564721
1371967652	mitochondrial sodium/hydrogen exchanger 9B2-like, partial [Hirondellea gigas]	3.37553	1	1	1	1	474	50.3	8.18	1.036	1.184	0.879	1.075	0.874	0.952	1.033	0.967	1.06825	0.566288
1562028910	40S ribosomal protein S12 [Armadillidium vulgare]	13.9665	2	3	2	1	179	19.7	7.93	1.014	0.934	1.002	1.045	1.083	0.922	0.983333	1.01667	0.967213	0.574519
1067079074	PREDICTED: alpha-L-fucosidase-like [Hyalella azteca]	2.04082	1	1	1	1	490	56.1	6.15	1.049	0.967	0.943	1.044	0.95	1.048	0.986333	1.014	0.972715	0.574639
1561986911	Apoptosis-inducing factor 1, mitochondrial [Armadillidium vulgare]	3.60577	1	2	1	1	416	45.7	7.31	0.999	1.019	0.954	0.977	1.056	0.995	0.990667	1.00933	0.981506	0.575686
1371967720	transmembrane emp24 domain-containing protein 7-like, partial [Hirondellea gigas]	6.41711	1	1	1	1	187	21.2	5.24	1.215	1.013	0.875	1.062	0.963	0.872	1.03433	0.965667	1.07111	0.576047
1562036545	Glycerol-3-phosphate dehydrogenase [NAD(+)], cytoplasmic [Armadillidium vulgare]	12.2363	4	7	4	1	474	53	7.3	0.975	1.045	1.005	1.007	1.014	0.953	1.00833	0.991333	1.01715	0.576196
1562009367	Methylcrotonoyl-CoA carboxylase subunit alpha, mitochondrial [Armadillidium vulgare]	1.38313	1	1	1	1	723	80.7	6.84	0.968	0.831	1.106	0.93	1.163	1.003	0.968333	1.032	0.938307	0.5772
1562027231	Synaptic functional regulator FMR1 [Armadillidium vulgare]	2.32143	1	2	1	1	560	61.6	9.19	1.024	0.993	1.057	1.099	0.826	1.001	1.02467	0.975333	1.05058	0.579666
1371957013	elongation factor 1-alpha, partial [Hirondellea gigas]	3.16206	1	2	1	1	253	27.9	8.21	1.105	0.842	0.901	0.756	1.168	1.228	0.949333	1.05067	0.903553	0.579767
1067075078	PREDICTED: casein kinase I [Hyalella azteca]	2.69461	1	1	1	1	334	38.5	9.5	1.064	0.806	1.037	0.924	1.144	1.026	0.969	1.03133	0.93956	0.580007
1562024019	Insulin-degrading enzyme [Armadillidium vulgare]	0.917431	1	2	1	1	981	112.9	5.96	1.007	0.989	1.025	1.033	0.961	0.985	1.007	0.993	1.0141	0.584639
1561970798	Muscle-specific protein 20 [Armadillidium vulgare]	7.59494	1	3	1	1	158	17.6	8.97	1.067	0.944	0.938	0.945	1.085	1.022	0.983	1.01733	0.966252	0.587936
1067086092	PREDICTED: cytoplasmic dynein 1 light intermediate chain 1-like [Hyalella azteca]	3.92749	1	1	1	1	331	37.7	5.25	1.281	1.103	0.755	1.029	0.91	0.922	1.04633	0.953667	1.09717	0.591359
1371968443	cytosolic 10-formyltetrahydrofolate dehydrogenase-like [Hirondellea gigas]	1.22087	1	2	1	1	901	98.3	6.05	1.066	0.857	1.017	0.977	1.07	1.013	0.98	1.02	0.960784	0.591479
195979071	myosin heavy chain, partial [Gammarus duebeni]	10.2439	2	3	1	1	205	22.5	6.29	1.077	0.92	0.942	0.92	1.063	1.079	0.979667	1.02067	0.95983	0.591821
1067086198	PREDICTED: fructose-bisphosphate aldolase-like [Hyalella azteca]	4.65753	1	7	1	1	365	40	6.55	1.017	0.902	1.171	1.093	0.958	0.859	1.03	0.97	1.06186	0.592514
1562016448	Elongation factor 1-alpha 1 [Armadillidium vulgare]	9.89583	3	7	1	1	384	42.5	8.03	1.106	1.029	0.922	0.921	1.055	0.966	1.019	0.980667	1.03909	0.594163
1371969190	staphylococcal nuclease domain-containing protein 1-like, partial [Hirondellea gigas]	1.22905	1	1	1	1	895	99.6	7.93	1.02	0.969	0.942	0.89	1.021	1.158	0.977	1.023	0.955034	0.599073
1562035951	Lysosomal aspartic protease, partial [Armadillidium vulgare]	4.36242	1	2	1	1	298	33	5.73	1.031	1.002	0.94	1.005	0.981	1.041	0.991	1.009	0.982161	0.603862
1562029119	putative citrate synthase 2, mitochondrial [Armadillidium vulgare]	6.22222	1	2	1	1	225	24.9	6.95	1	0.862	1.081	0.985	1.06	1.012	0.981	1.019	0.962709	0.603967
1067108283	PREDICTED: tubulin beta chain-like [Hyalella azteca]	14.0312	5	16	2	1	449	50.5	4.86	0.975	1.008	0.985	1.002	0.951	1.079	0.989333	1.01067	0.978892	0.608705
1562030114	U6 snRNA-associated Sm-like protein LSm7 [Armadillidium vulgare]	5.6	1	1	1	1	125	13.4	5.63	1.142	0.898	1.025	0.913	0.997	1.026	1.02167	0.978667	1.04394	0.611582
1561991959	Coatomer subunit beta [Armadillidium vulgare]	1.04167	1	1	1	1	960	108.4	6.09	0.952	1.082	1.029	1.022	0.848	1.067	1.021	0.979	1.0429	0.613108
1562031549	cAMP-dependent protein kinase catalytic subunit [Armadillidium vulgare]	13.0435	3	3	3	1	322	37.3	8.15	1.035	0.984	1.012	0.964	0.946	1.059	1.01033	0.989667	1.02088	0.615694
1562032165	AP-1 complex subunit beta-1 [Armadillidium vulgare]	2.50855	2	2	2	1	877	97	4.98	0.963	0.944	1.06	1.041	1.011	0.98	0.989	1.01067	0.978562	0.616856
1067096159	PREDICTED: T-complex protein 1 subunit theta-like [Hyalella azteca]	1.86916	1	1	1	1	535	58.5	5.55	1.053	1.01	0.991	0.865	1.088	0.993	1.018	0.982	1.03666	0.620363
1371968973	stress-induced-phosphoprotein 1-like [Hirondellea gigas]	3.20856	2	2	1	1	561	62.8	7.37	0.988	0.924	1.043	1.052	1.067	0.926	0.985	1.015	0.970443	0.622975
1561989382	Cofilin/actin-depolymerizing factor-like protein [Armadillidium vulgare]	12.0253	1	2	1	1	158	18	5.47	0.952	1.037	1.053	1.062	0.981	0.915	1.014	0.986	1.0284	0.624065
1562005838	GDP-mannose 4,6 dehydratase [Armadillidium vulgare]	5.89888	2	2	2	1	356	40.4	7.11	1.031	0.933	1.077	0.925	0.997	1.037	1.01367	0.986333	1.02771	0.637159
1067061457	PREDICTED: ATP-dependent RNA helicase A-like [Hyalella azteca]	0.996933	1	1	1	1	1304	143.5	7.21	1.314	0.753	1.117	1.079	1.149	0.588	1.06133	0.938667	1.13068	0.637749
1067082845	PREDICTED: inositol monophosphatase 2-like isoform X1 [Hyalella azteca]	4.37956	1	1	1	1	274	30.4	5.16	1.139	0.902	1.011	0.973	0.989	0.986	1.01733	0.982667	1.03528	0.640198
1562035629	Arfaptin-2 [Armadillidium vulgare]	4.25532	1	1	1	1	376	41.9	7.31	1.047	1.012	0.839	0.831	1.03	1.241	0.966	1.034	0.934236	0.640247
1371970016	Fumarate hydratase, mitochondrial [Hirondellea gigas]	7.78443	3	3	1	1	501	53.9	7.34	0.967	1.085	0.833	1.292	0.989	0.835	0.961667	1.03867	0.925866	0.640608
1561978472	tRNA (uracil-5-)-methyltransferase-like protein A [Armadillidium vulgare]	1.01937	1	1	1	1	981	108.2	5.6	1.072	0.92	1.052	0.958	1.053	0.945	1.01467	0.985333	1.02977	0.642897
1067066628	PREDICTED: TPPP family protein CG45057-like [Hyalella azteca]	2.28137	1	1	1	1	263	28.8	9.03	0.967	1.103	0.874	1.027	1.071	0.957	0.981333	1.01833	0.963666	0.644711
1562029063	Reticulon-1-A [Armadillidium vulgare]	7.40741	2	4	2	1	216	24.4	8.66	0.974	0.973	1.149	1.178	0.949	0.777	1.032	0.968	1.06612	0.648418
1562029776	SH3 domain-binding glutamic acid-rich protein-like [Armadillidium vulgare]	5.7554	1	1	1	1	139	15.2	4.77	0.909	1.019	1.23	1.317	0.856	0.669	1.05267	0.947333	1.11119	0.648887
1562001206	Heterogeneous nuclear ribonucleoprotein Q, partial [Armadillidium vulgare]	17.2043	6	8	5	1	372	42.3	8.53	1.048	0.977	1.017	0.886	1.004	1.068	1.014	0.986	1.0284	0.649714
1371970262	eukaryotic initiation factor 4A, partial [Hirondellea gigas]	6.06061	2	2	2	1	297	34.3	6.55	1.061	0.993	0.973	0.943	1	1.03	1.009	0.991	1.01816	0.65107
1562036239	Septin-1 [Armadillidium vulgare]	5.70571	1	1	1	1	333	37.3	6.54	0.811	0.991	1.116	1.167	0.981	0.934	0.972667	1.02733	0.946788	0.655402
1562006873	Glycogen phosphorylase [Armadillidium vulgare]	5.08083	2	10	1	1	433	49.6	6.28	1.037	0.952	1.072	1.106	0.994	0.839	1.02033	0.979667	1.04151	0.658106
1371961099	3-hydroxyanthranilate 3,4-dioxygenase-like, partial [Hirondellea gigas]	6.53595	1	2	1	1	153	17.4	6.95	1.099	0.891	0.965	0.998	1.001	1.045	0.985	1.01467	0.970762	0.660959
1562002925	Very-long-chain 3-oxoacyl-CoA reductase-B [Armadillidium vulgare]	2.5641	1	1	1	1	312	34.6	9.7	0.925	1.08	1.05	1.003	0.864	1.079	1.01833	0.982	1.037	0.668834
1067099940	PREDICTED: 60S ribosomal protein L18a-like [Hyalella azteca]	4.51977	1	1	1	1	177	21	10.67	1.042	0.983	0.909	0.858	1.154	1.053	0.978	1.02167	0.957259	0.669676
1067077136	PREDICTED: long-chain specific acyl-CoA dehydrogenase, mitochondrial-like isoform X1 [Hyalella azteca]	5.81395	2	2	2	1	430	47.7	7.06	1.051	0.909	0.995	1.097	0.922	1.026	0.985	1.015	0.970443	0.670628
1562036891	Adenylate kinase isoenzyme 1 [Armadillidium vulgare]	14.8936	2	2	1	1	141	15.6	9.51	0.962	1.046	1.108	1.273	0.889	0.723	1.03867	0.961667	1.08007	0.671012
1067099829	PREDICTED: uncharacterized protein LOC108669201 isoform X1 [Hyalella azteca]	5.91716	1	2	1	1	169	19.1	7.36	0.995	0.982	0.99	0.934	0.998	1.101	0.989	1.011	0.978239	0.675429
1562034469	Nucleolar protein 56 [Armadillidium vulgare]	2.33918	1	1	1	1	513	57	9.38	1.058	1.081	0.929	0.8	1.044	1.088	1.02267	0.977333	1.04638	0.677652
1562004605	40S ribosomal protein S7 [Armadillidium vulgare]	8.58586	2	3	2	1	198	22.7	9.86	1.076	0.888	0.994	0.952	1.032	1.058	0.986	1.014	0.972387	0.680068
1371955585	S-adenosylmethionine synthase-like, partial [Hirondellea gigas]	12.5	1	2	1	1	136	14.8	4.65	0.88	1.125	0.904	0.967	0.871	1.254	0.969667	1.03067	0.940815	0.683408
1067068172	PREDICTED: calpain-B-like [Hyalella azteca]	0.878906	1	1	1	1	1024	111.7	4.93	1.071	0.832	1.045	0.982	1.009	1.06	0.982667	1.017	0.966241	0.686584
1067081574	PREDICTED: LIM domain-binding protein 3-like, partial [Hyalella azteca]	4.40529	1	2	1	1	227	24	8.68	0.891	1.178	0.839	0.871	1.016	1.205	0.969333	1.03067	0.940492	0.690166
1067076547	PREDICTED: casein kinase II subunit alpha [Hyalella azteca]	4.26136	1	1	1	1	352	41.7	7.14	1.045	0.958	1.029	1.03	0.908	1.032	1.01067	0.99	1.02088	0.694585
1562027046	Voltage-dependent anion-selective channel protein 2 [Armadillidium vulgare]	14.1844	3	5	3	1	282	30.4	8.65	1.051	0.976	1.005	0.898	1.043	1.027	1.01067	0.989333	1.02156	0.696259
1371969677	beta-actin, partial [Hirondellea gigas]	58.9928	5	78	1	1	139	15.5	6.27	0.988	0.919	1.136	1.021	0.929	1.006	1.01433	0.985333	1.02943	0.70019
1562034698	putative ATP-citrate synthase subunit 2, partial [Armadillidium vulgare]	9.09091	2	2	2	1	220	23.9	6.21	0.907	1.037	1.015	1.081	0.911	1.048	0.986333	1.01333	0.973355	0.702361
190014502	putative glyceraldehyde-3-phosphate dehydrogenase [Gammarus locusta]	11.0778	3	13	2	1	334	35.7	6.57	0.784	1.628	0.76	0.871	0.926	1.031	1.05733	0.942667	1.12164	0.712029
1561968572	Myosin regulatory light chain 2 [Armadillidium vulgare]	4.54545	1	6	1	1	198	21.9	4.82	0.898	0.909	1.08	1.393	0.929	0.791	0.962333	1.03767	0.927401	0.713925
1371969327	phospholipase D gamma 3-like [Hirondellea gigas]	2.01058	2	3	2	1	945	105.8	6.71	1.063	0.943	0.948	0.897	1.015	1.134	0.984667	1.01533	0.969796	0.717139
1562033809	adenylate kinase [Armadillidium vulgare]	3.67647	1	1	1	1	272	30.6	8.37	0.938	1.056	0.977	1.075	1.007	0.947	0.990333	1.00967	0.980852	0.722421
1562010728	Golgi reassembly-stacking protein 2 [Armadillidium vulgare]	5.03597	2	3	2	1	417	44.1	5.15	1.024	0.986	1.007	0.968	1.05	0.965	1.00567	0.994333	1.0114	0.724241
1371967951	formimidoyltransferase-cyclodeaminase-like [Hirondellea gigas]	2.18579	1	3	1	1	549	59.4	5.92	1.112	0.945	0.982	0.89	1.056	1.014	1.013	0.986667	1.02669	0.729689
1371968930	trifunctional enzyme subunit beta, mitochondrial-like [Hirondellea gigas]	4.86258	2	6	2	1	473	50.6	9.22	1.06	0.895	1.007	0.916	1.061	1.061	0.987333	1.01267	0.974984	0.73051
1561983309	Ubiquitin-conjugating enzyme E2 2 [Armadillidium vulgare]	7.58621	1	1	1	1	145	16.3	6.67	1.012	0.974	1.044	1.061	1.017	0.892	1.01	0.99	1.0202	0.732289
1067077595	PREDICTED: 3-oxoacyl-[acyl-carrier-protein] reductase FabG-like [Hyalella azteca]	5.15464	1	1	1	1	291	31.3	8.57	0.885	0.925	1.137	0.905	1.079	1.069	0.982333	1.01767	0.96528	0.732571
1562030285	Signal peptidase complex catalytic subunit SEC11C [Armadillidium vulgare]	7.00935	2	2	2	1	214	24.4	9.11	1.053	0.908	1.011	0.981	1.066	0.981	0.990667	1.00933	0.981506	0.73563
1561992351	Vigilin [Armadillidium vulgare]	1.92791	2	2	2	1	1193	134.3	6.95	1.033	0.976	0.969	1.071	1.006	0.945	0.992667	1.00733	0.98544	0.742467
1562036845	putative serine--tRNA ligase, cytoplasmic [Armadillidium vulgare]	4.73251	2	2	2	1	486	54.9	5.54	1.133	0.992	0.918	1.048	0.874	1.034	1.01433	0.985333	1.02943	0.747916
1067062566	PREDICTED: actin-related protein 2/3 complex subunit 4-like [Hyalella azteca]	4.39024	1	1	1	1	205	24.3	7.23	1.151	0.861	1.038	0.956	1.08	0.913	1.01667	0.983	1.03425	0.748796
1371953947	tyrosine-protein kinase hopscotch-like, partial [Hirondellea gigas]	7.36842	1	2	1	1	190	21.2	6.68	0.81	1.062	1.222	1.248	0.82	0.838	1.03133	0.968667	1.06469	0.75076
1562003387	Acetyl-CoA acetyltransferase, mitochondrial [Armadillidium vulgare]	2.12314	1	1	1	1	471	51.4	8.38	1.069	0.911	0.99	0.998	1.077	0.954	0.99	1.00967	0.980522	0.751993
1067095796	PREDICTED: NADH-ubiquinone oxidoreductase 75 kDa subunit, mitochondrial-like [Hyalella azteca]	4.75504	3	5	2	1	694	74.6	7.31	1.065	0.925	0.989	0.995	1.038	0.989	0.993	1.00733	0.985771	0.757276
1371970044	fructose-bisphosphate aldolase-like [Hirondellea gigas]	9.31507	3	6	2	1	365	40.1	7.05	0.754	1.668	0.734	0.869	0.886	1.089	1.052	0.948	1.1097	0.758622
1371961611	ras-like protein [Hirondellea gigas]	11.7949	2	2	2	1	195	22.2	6.1	1.014	0.894	1.126	0.948	1.019	0.999	1.01133	0.988667	1.02293	0.763089
1067071537	PREDICTED: fructose-bisphosphate aldolase-like [Hyalella azteca]	2.19178	1	2	1	1	365	39.6	7.75	1.042	0.933	0.997	0.908	1.059	1.061	0.990667	1.00933	0.981506	0.770258
1067073839	PREDICTED: glucosamine-6-phosphate isomerase 2-like isoform X1 [Hyalella azteca]	6.64207	2	2	1	1	271	30.1	6.52	1.114	0.883	0.946	0.825	1.054	1.179	0.981	1.01933	0.962394	0.7735
1562005318	Dihydrolipoyllysine-residue succinyltransferase [Armadillidium vulgare]	2.22222	1	1	1	1	360	40	8.21	0.998	0.962	1.026	1.04	0.957	1.016	0.995333	1.00433	0.991039	0.78494
1067076821	PREDICTED: proteasome subunit beta type-2-like [Hyalella azteca]	3.43137	1	1	1	1	204	23.2	6.21	1.045	1.007	0.933	0.983	1.021	1.011	0.995	1.005	0.99005	0.78808
1067074373	PREDICTED: alpha-N-acetylglucosaminidase-like [Hyalella azteca]	0.842993	1	1	1	1	949	105.4	5.82	0.614	1.533	0.714	1.147	1.22	0.771	0.953667	1.046	0.911727	0.788944
1562022678	Ubiquitin-like modifier-activating enzyme 1 [Armadillidium vulgare]	5.30973	5	5	5	1	1017	113.8	5.36	1.01	0.954	1.025	1.028	1.003	0.98	0.996333	1.00367	0.992693	0.789299
1269636304	cytochrome c oxidase subunit 3 (mitochondrion) [Tachaea chinensis]	4.18251	1	1	1	1	263	30.5	7.01	1.054	0.94	0.958	0.82	1.037	1.191	0.984	1.016	0.968504	0.791585
1067076829	PREDICTED: talin-2-like isoform X1 [Hyalella azteca]	0.514139	2	3	1	1	2723	291.1	6.39	1.021	1.025	0.974	0.904	1.056	1.019	1.00667	0.993	1.01376	0.792519
1562028561	Alpha-soluble NSF attachment protein [Armadillidium vulgare]	13.0584	3	3	2	1	291	32.8	5.45	0.947	1.044	1.045	1.145	0.886	0.933	1.012	0.988	1.02429	0.794115
1371965538	alanine--tRNA ligase, cytoplasmic-like [Hirondellea gigas]	2.59631	3	3	3	1	1194	131.8	6.57	1.048	0.973	0.963	0.968	0.99	1.057	0.994667	1.005	0.989718	0.798578
1562017376	Ribosome maturation protein SBDS [Armadillidium vulgare]	3.57143	1	1	1	1	252	28.7	9	1.007	0.938	1.037	0.95	1.064	1.004	0.994	1.006	0.988072	0.798916
1067067269	PREDICTED: ubiquitin-like [Hyalella azteca]	26.3566	3	9	3	1	129	14.6	9.83	0.865	1.452	0.775	0.811	0.974	1.123	1.03067	0.969333	1.06327	0.8034
1561989322	40S ribosomal protein S20 [Armadillidium vulgare]	10.084	1	1	1	1	119	13.4	9.44	0.993	1.044	0.974	0.952	1.015	1.02	1.00367	0.995667	1.00803	0.804542
1562032463	Myelin P2 protein [Armadillidium vulgare]	6.71642	1	1	1	1	134	15.1	8.12	0.973	0.958	1.096	1.101	0.939	0.932	1.009	0.990667	1.01851	0.807442
1561985013	malate dehydrogenase [Armadillidium vulgare]	6.55738	2	3	2	1	427	46.4	8.35	1.16	0.834	0.957	0.847	1.098	1.104	0.983667	1.01633	0.967858	0.810138
1371968377	moesin/ezrin/radixin homolog 1-like [Hirondellea gigas]	1.94715	2	2	1	1	719	83.7	5.38	1.114	0.847	1.073	0.925	1.013	1.028	1.01133	0.988667	1.02293	0.811556
1561989321	Proliferation-associated protein 2G4 [Armadillidium vulgare]	2.80899	1	1	1	1	356	40.2	6.11	1.111	0.856	1	0.93	1.088	1.015	0.989	1.011	0.978239	0.812399
1371956405	girdin-like, partial [Hirondellea gigas]	0.637755	1	2	1	1	784	91.3	7.58	1.026	0.925	1.066	1.014	1.008	0.961	1.00567	0.994333	1.0114	0.814275
1371960956	U6 snRNA-associated Sm-like protein LSm2, partial [Hirondellea gigas]	5.55556	1	1	1	1	126	14.4	6.54	1.028	1.024	0.937	0.985	1.008	1.019	0.996333	1.004	0.992364	0.818743
1067081762	PREDICTED: endochitinase-like [Hyalella azteca]	2.18579	1	2	1	1	549	60.7	6.38	1.205	0.914	0.931	0.785	1.046	1.119	1.01667	0.983333	1.0339	0.821583
1562027795	tRNA-splicing ligase RtcB-like protein [Armadillidium vulgare]	2.31362	1	1	1	1	389	43	7.75	0.914	1.205	0.926	0.855	0.943	1.157	1.015	0.985	1.03046	0.829694
1371970306	arginine kinase [Hirondellea gigas]	13.8021	7	44	3	1	384	43.2	6.54	0.981	1.078	0.925	1.004	0.967	1.046	0.994667	1.00567	0.989062	0.837223
1562015596	60S ribosomal protein L12 [Armadillidium vulgare]	14.5631	1	1	1	1	103	11.3	9.94	0.812	1.08	1.161	1.218	0.81	0.919	1.01767	0.982333	1.03597	0.837266
1561995506	Spectrin beta chain, non-erythrocytic 5 [Armadillidium vulgare]	1.1335	1	1	1	1	794	91.8	5.55	1.003	1.095	0.924	0.975	1.08	0.923	1.00733	0.992667	1.01478	0.83892
1562007762	40S ribosomal protein S10 [Armadillidium vulgare]	11.465	2	3	2	1	157	17.7	9.94	1.101	0.934	0.947	0.984	1.039	0.995	0.994	1.006	0.988072	0.841366
1562034699	ATP-citrate synthase [Armadillidium vulgare]	2.01005	1	1	1	1	597	66.2	7.02	1.077	0.844	1.134	0.836	0.834	1.276	1.01833	0.982	1.037	0.842749
1561973714	Ufm1-specific protease 1 [Armadillidium vulgare]	6.58436	1	1	1	1	243	27.1	5.2	0.918	0.826	1.203	0.779	1.118	1.154	0.982333	1.017	0.965913	0.843639
1562024390	Epidermal growth factor receptor substrate 15-like 1 [Armadillidium vulgare]	6.34518	2	2	1	1	394	44.8	7.17	0.864	1.108	1.093	1.357	0.824	0.754	1.02167	0.978333	1.04429	0.843766
1562014738	Adenosylhomocysteinase A [Armadillidium vulgare]	7.44186	3	6	2	1	430	47.3	6.21	1.053	0.896	1.072	1.022	1.032	0.926	1.007	0.993333	1.01376	0.844233
1067101070	PREDICTED: glycogen debranching enzyme-like isoform X1 [Hyalella azteca]	2.14286	3	5	3	1	1540	170.7	6.68	0.967	1.022	1.029	1.102	0.961	0.918	1.006	0.993667	1.01241	0.844444
1562007068	Dolichyl-diphosphooligosaccharide--protein glycosyltransferase 48 kDa subunit [Armadillidium vulgare]	4.7619	2	2	2	1	441	49.1	5.83	1.017	0.823	1.129	0.978	0.949	1.105	0.989667	1.01067	0.979222	0.846066
1561986766	60S ribosomal protein L27a [Armadillidium vulgare]	4.57143	1	1	1	1	175	19.9	10.56	1.003	0.929	1.025	1.277	0.937	0.828	0.985667	1.014	0.972058	0.847672
1561972833	Ubiquitin-conjugating enzyme E2 variant 1 [Armadillidium vulgare]	6.71141	1	2	1	1	149	17.1	9.41	1.022	0.901	1.096	0.942	1.043	0.996	1.00633	0.993667	1.01275	0.852505
1067081097	PREDICTED: profilin-like [Hyalella azteca]	10.3175	1	1	1	1	126	13.8	6.29	1.075	0.894	1.011	0.92	1.037	1.064	0.993333	1.007	0.986428	0.852653
1561968970	Paramyosin, short form [Armadillidium vulgare]	21.547	8	16	6	1	362	42	6.32	1.078	0.912	0.993	0.944	1.051	1.021	0.994333	1.00533	0.989058	0.857732
1562029672	U5 small nuclear ribonucleoprotein component [Armadillidium vulgare]	1.33745	1	1	1	1	972	110.4	5.07	1.097	0.953	0.92	0.932	1.198	0.901	0.99	1.01033	0.979875	0.860847
1561978676	60S ribosomal protein L23 [Armadillidium vulgare]	12.1429	2	2	2	1	140	14.8	10.56	0.933	1	1.041	0.899	0.942	1.186	0.991333	1.009	0.982491	0.861159
1561983174	Glyceraldehyde-3-phosphate dehydrogenase [Armadillidium vulgare]	16.0121	5	38	4	1	331	35.5	6.65	0.98	0.99	1.02	1.066	0.979	0.964	0.996667	1.003	0.993686	0.861262
1561978681	T-complex protein 1 subunit epsilon, partial [Armadillidium vulgare]	10.0264	4	6	4	1	379	41.5	5.3	0.954	0.989	1.048	1.036	0.975	0.998	0.997	1.003	0.994018	0.863303
1371969789	filamin-A, partial [Hirondellea gigas]	1.10263	3	5	1	1	2358	250.7	5.91	1.175	0.845	1.007	0.96	0.962	1.051	1.009	0.991	1.01816	0.865747
1067072765	PREDICTED: spliceosome RNA helicase DDX39B-like [Hyalella azteca]	5.80046	3	4	1	1	431	48.9	5.58	1.032	0.912	1.042	0.941	1.039	1.034	0.995333	1.00467	0.99071	0.867624
1067063913	PREDICTED: 26S protease regulatory subunit 10B [Hyalella azteca]	7.45501	3	5	3	1	389	44.3	7.74	1.037	0.963	0.991	0.951	1.025	1.033	0.997	1.003	0.994018	0.867972
1561969796	Cystathionine gamma-lyase [Armadillidium vulgare]	2.30769	1	1	1	1	390	43.6	9.04	1.075	0.962	0.974	0.981	0.967	1.041	1.00367	0.996333	1.00736	0.871137
1562035135	putative phosphorylase b kinase regulatory subunit alpha, partial [Armadillidium vulgare]	1.92308	1	1	1	1	416	46.5	8.09	0.924	1.275	0.841	0.796	1.045	1.118	1.01333	0.986333	1.02737	0.87788
1371970197	ATP synthase subunit alpha, mitochondrial-like [Hirondellea gigas]	13.6937	7	16	1	1	555	60.1	9.04	1.145	0.903	0.971	1.048	0.99	0.944	1.00633	0.994	1.01241	0.882156
1562030884	ATP-dependent 6-phosphofructokinase [Armadillidium vulgare]	5.90551	1	1	1	1	254	28.4	5.69	1.162	0.753	1.056	1.02	1.045	0.965	0.990333	1.01	0.980528	0.882424
1562036814	putative ATP-dependent RNA helicase DDX17 [Armadillidium vulgare]	4	2	2	0	1	475	52.1	9.36	1.044	0.977	0.965	0.906	1.01	1.098	0.995333	1.00467	0.99071	0.885224
1067097587	PREDICTED: UDP-N-acetylglucosamine--peptide N-acetylglucosaminyltransferase 110 kDa subunit-like isoform X1 [Hyalella azteca]	2.55682	2	3	1	1	1056	117.5	6.74	1.049	0.993	0.965	1.011	0.969	1.014	1.00233	0.998	1.00434	0.887096
1562027095	Glucosamine-6-phosphate isomerase [Armadillidium vulgare]	8.88889	2	2	1	1	270	30.5	6.86	1.068	0.908	1.039	0.884	1.02	1.08	1.005	0.994667	1.01039	0.898488
1561978338	Electron transfer flavoprotein subunit beta [Armadillidium vulgare]	16.4634	2	2	2	1	164	18.6	9.5	1.048	0.897	1.068	0.92	0.989	1.077	1.00433	0.995333	1.00904	0.904649
1562016807	Gamma-butyrobetaine dioxygenase, partial [Armadillidium vulgare]	3.09278	1	1	1	1	388	44.7	8.28	0.862	1.137	0.986	0.996	1.002	1.017	0.995	1.005	0.99005	0.906272
1561987008	Catalase [Armadillidium vulgare]	2.1398	1	1	1	1	701	79.4	8.46	0.973	1.013	0.998	0.963	1.177	0.877	0.994667	1.00567	0.989062	0.908568
1067117422	PREDICTED: T-complex protein 1 subunit zeta-like [Hyalella azteca]	5.06567	3	3	3	1	533	58	7.01	1.054	0.956	0.999	0.91	1.047	1.033	1.003	0.996667	1.00635	0.908842
1067082029	PREDICTED: protein transport protein Sec61 subunit beta-like [Hyalella azteca]	10.2041	1	2	1	1	98	10.1	11.8	1.037	0.954	1.015	0.967	0.985	1.042	1.002	0.998	1.00401	0.910913
1562029814	hypothetical protein Avbf_02262 [Armadillidium vulgare]	5.69106	1	2	1	1	246	27.6	9.04	1.113	0.775	1.09	0.952	1.132	0.937	0.992667	1.007	0.985766	0.914745
1561976243	Polyadenylate-binding protein 1 [Armadillidium vulgare]	1.57978	1	1	1	1	633	70.7	9.36	0.988	1.005	1.001	0.927	1.05	1.03	0.998	1.00233	0.995677	0.915699
1561987639	UDP-N-acetylglucosamine--peptide N-acetylglucosaminyltransferase subunit [Armadillidium vulgare]	3.47222	3	3	2	1	1008	113.1	6.83	1.038	0.935	1.016	0.892	1.022	1.097	0.996333	1.00367	0.992693	0.918813
1562027474	Alpha-actinin, sarcomeric [Armadillidium vulgare]	32.7935	15	33	3	1	494	57.3	6.84	1.054	0.948	0.992	0.955	0.999	1.052	0.998	1.002	0.996008	0.928046
1561982589	putative aminopeptidase W07G4.4, partial [Armadillidium vulgare]	3.80952	1	2	1	1	420	45.4	7.72	1.086	0.968	0.953	0.992	0.952	1.049	1.00233	0.997667	1.00468	0.930959
1562035543	26S protease regulatory subunit 6A [Armadillidium vulgare]	4.44965	2	5	1	1	427	47.7	5.27	1.034	0.894	1.081	0.921	1.072	0.997	1.003	0.996667	1.00635	0.933298
1067087507	PREDICTED: serine/threonine-protein phosphatase 2B catalytic subunit 2-like, partial [Hyalella azteca]	6.73317	3	3	1	1	401	46	5.19	1.033	0.938	1.023	0.925	1.058	1.024	0.998	1.00233	0.995677	0.935099
164632871	cyclophilin G, partial [Armadillidium vulgare]	12.5	1	1	1	1	112	12.1	9.44	1.198	0.903	0.875	0.692	1.108	1.224	0.992	1.008	0.984127	0.937502
1371953315	mitochondrial cytochrome c oxidase subunit Va, partial [Hirondellea gigas]	7.14286	1	1	1	1	126	14.2	9.16	1.053	0.963	0.979	0.992	1.057	0.956	0.998333	1.00167	0.996672	0.938389
1561988563	Methylmalonate-semialdehyde dehydrogenase [acylating], mitochondrial [Armadillidium vulgare]	3.22581	1	1	1	1	279	30.2	6.86	1.071	0.92	1.015	1.018	1.025	0.951	1.002	0.998	1.00401	0.940064
1562036405	Vinculin [Armadillidium vulgare]	8.43116	7	11	7	1	937	103.4	6.84	0.97	0.988	1.035	1.111	0.968	0.928	0.997667	1.00233	0.995344	0.940584
1562036722	Stress-induced-phosphoprotein 1 [Armadillidium vulgare]	5.70265	3	4	2	1	491	56	5.73	1.008	0.984	1.006	1.048	0.988	0.967	0.999333	1.001	0.998335	0.950943
1561979255	Tubulin beta-2 chain [Armadillidium vulgare]	10.559	3	6	1	1	322	35.9	5.88	1.129	0.992	0.887	0.996	0.938	1.059	1.00267	0.997667	1.00501	0.952143
1067091684	PREDICTED: dnaJ homolog subfamily B member 4-like [Hyalella azteca]	3.38028	1	1	1	1	355	39.2	8.92	1.08	0.89	1.036	0.991	0.982	1.022	1.002	0.998333	1.00367	0.953179
1561993333	Signal recognition particle 54 kDa protein [Armadillidium vulgare]	2.20264	1	1	1	1	454	50.4	7.44	1.089	0.967	0.949	0.98	0.95	1.065	1.00167	0.998333	1.00334	0.955275
1561997959	Eukaryotic peptide chain release factor GTP-binding subunit ERF3A [Armadillidium vulgare]	8.11321	3	3	3	1	530	59.3	5.59	1.098	0.924	0.984	0.905	1.053	1.036	1.002	0.998	1.00401	0.956685
1561970260	60S ribosomal protein L24 [Armadillidium vulgare]	9.62963	1	2	1	1	135	15.6	11.19	1.086	1.034	0.869	0.773	1.086	1.151	0.996333	1.00333	0.993023	0.960776
1561996415	Nuclear protein localization protein 4-like protein, partial [Armadillidium vulgare]	1.5625	1	1	1	1	576	65.1	6.8	1.089	0.919	0.998	0.863	1.054	1.077	1.002	0.998	1.00401	0.964193
1561976124	4-hydroxyphenylpyruvate dioxygenase-like protein [Armadillidium vulgare]	5.75916	2	3	2	1	382	43.7	6.33	0.999	0.943	1.055	0.966	1.03	1.006	0.999	1.00067	0.998334	0.966532
1562026290	60S ribosomal protein L7a [Armadillidium vulgare]	9.23077	2	4	2	1	260	29.9	10.76	1.046	0.914	1.037	0.986	1.039	0.978	0.999	1.001	0.998002	0.967881
1561972860	60S ribosomal protein L19 [Armadillidium vulgare]	4.7619	1	1	1	1	189	22.5	11.4	1.147	0.995	0.865	0.84	1.051	1.102	1.00233	0.997667	1.00468	0.969398
1067078835	PREDICTED: kinesin heavy chain-like [Hyalella azteca]	0.809353	1	1	1	1	1112	125	6.16	0.947	1.047	1.009	0.905	1.027	1.065	1.001	0.999	1.002	0.973402
1067085600	PREDICTED: UDP-glucose:glycoprotein glucosyltransferase 1-like isoform X1 [Hyalella azteca]	1.13208	2	2	2	1	1590	178	6.18	0.923	0.961	1.12	1.07	0.9	1.026	1.00133	0.998667	1.00267	0.974679
1561987571	COP9 signalosome complex subunit 1 [Armadillidium vulgare]	3.89105	1	1	1	1	514	57.1	7.25	1.056	0.915	1.032	1.014	1.032	0.952	1.001	0.999333	1.00167	0.974926
1562035463	putative N-acetyltransferase san [Armadillidium vulgare]	6.28931	1	1	1	1	159	18.3	8.51	0.99	0.972	1.039	1.026	0.943	1.029	1.00033	0.999333	1.001	0.978307
1371963987	3-oxoacyl-(acyl-carrier-protein) reductase FabG-like [Hirondellea gigas]	5.74713	1	1	1	1	261	28.1	6.4	1.185	0.67	1.151	1.147	0.909	0.938	1.002	0.998	1.00401	0.983555
1067067283	PREDICTED: LOW QUALITY PROTEIN: heat shock 70 kDa protein cognate 3-like [Hyalella azteca]	3.04878	2	4	1	1	656	72.6	5.36	1	1.09	0.912	0.925	1.024	1.05	1.00067	0.999667	1.001	0.988274
1562001205	hypothetical protein Avbf_06794 [Armadillidium vulgare]	11.8421	1	1	1	1	76	8.9	4.75	1.087	0.972	0.94	0.991	1.063	0.947	0.999667	1.00033	0.999334	0.991071
1562035990	Protein arginine N-methyltransferase 1 [Armadillidium vulgare]	2.7027	1	2	1	1	333	39.2	6.11	1.059	0.916	1.024	1.011	0.995	0.994	0.999667	1	0.999667	0.994238
1067072156	PREDICTED: isoleucine--tRNA ligase, cytoplasmic-like [Hyalella azteca]	1.30933	1	1	1	1	1222	137.2	6.46	1.021	0.918	1.061	0.928	0.927	1.145	1	1	1	1
